# Supplementary material for: Hospitalisation rates for children with intellectual disability or autism born in Western Australia 1983–1999: a population-based cohort study
Source: PubMed Central journal article supplement — BMJ Open. 2013 Feb 27;3(2):e002356. doi: 10.1136/bmjopen-2012-002356 (PMC3586131; doi:10.1136/bmjopen-2012-002356), 2013-02-27
Supplement: bmjopen-2012-002356.draft_revisions.pdf [file bmjopen-2012-002356.draft_revisions.pdf]

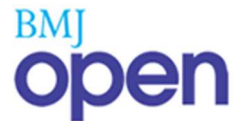

**Hospitalisation rates for children with intellectual disability  
or autism born in Western Australia 1983 – 1999: a  
population-based cohort study**

|                                 |                                                                                                                                                                                                                                                                                                                                                                                                                                                                                                                                                                                                                                                                                                                                                           |
|---------------------------------|-----------------------------------------------------------------------------------------------------------------------------------------------------------------------------------------------------------------------------------------------------------------------------------------------------------------------------------------------------------------------------------------------------------------------------------------------------------------------------------------------------------------------------------------------------------------------------------------------------------------------------------------------------------------------------------------------------------------------------------------------------------|
| Journal:                        | <i>BMJ Open</i>                                                                                                                                                                                                                                                                                                                                                                                                                                                                                                                                                                                                                                                                                                                                           |
| Manuscript ID:                  | bmjopen-2012-002356                                                                                                                                                                                                                                                                                                                                                                                                                                                                                                                                                                                                                                                                                                                                       |
| Article Type:                   | Research                                                                                                                                                                                                                                                                                                                                                                                                                                                                                                                                                                                                                                                                                                                                                  |
| Date Submitted by the Author:   | 16-Nov-2012                                                                                                                                                                                                                                                                                                                                                                                                                                                                                                                                                                                                                                                                                                                                               |
| Complete List of Authors:       | Bebbington, Ami; Telethon Institute for Child Health Research, Centre for Child Health Research, University of Western Australia<br>Glasson, Emma; Telethon Institute for Child Health Research, Centre for Child Health Research, University of Western Australia; The University of Western Australia, School of Population Health Research<br>Bourke, Jenny; Telethon Institute for Child Health Research, Centre for Child Health Research, University of Western Australia<br>de Klerk, Nicholas; Telethon Institute for Child Health Research, Centre for Child Health Research, University of Western Australia<br>Leonard, Helen; Telethon Institute for Child Health Research, Centre for Child Health Research, University of Western Australia |
| <b>Primary Subject Heading</b>: | Epidemiology                                                                                                                                                                                                                                                                                                                                                                                                                                                                                                                                                                                                                                                                                                                                              |
| Secondary Subject Heading:      | Paediatrics, Health services research, Public health                                                                                                                                                                                                                                                                                                                                                                                                                                                                                                                                                                                                                                                                                                      |
| Keywords:                       | EPIDEMIOLOGY, Developmental neurology & neurodisability < PAEDIATRICS, PUBLIC HEALTH                                                                                                                                                                                                                                                                                                                                                                                                                                                                                                                                                                                                                                                                      |
|                                 |                                                                                                                                                                                                                                                                                                                                                                                                                                                                                                                                                                                                                                                                                                                                                           |

SCHOLARONE™  
Manuscripts

1  
2  
3  
4  
5 Title: Hospitalisation rates for children with intellectual disability or autism born in Western  
6 Australia 1983 – 1999: a population-based cohort study  
7

8 Ami Bebbington<sup>1</sup>, BSc (Hons)  
9 Emma Glasson<sup>1,2</sup>, PhD  
10 Jenny Bourke<sup>1</sup>, MPH  
11 Nicholas de Klerk<sup>1</sup>, PhD  
12 Helen Leonard,<sup>1</sup> MBChB MPH  
13

14  
15 <sup>1</sup> Telethon Institute for Child Health Research, Centre for Child Health Research, The University of  
16 Western Australia

17 <sup>2</sup> School of Population Health Research, The University of Western Australia  
18  
19

20  
21 Corresponding author: Helen Leonard  
22 Telethon Institute for Child Health Research  
23 PO Box 855,  
24 West Perth 6872  
25 Western Australia  
26 Phone: +61 8 94897790, mobile 0419956946  
27 Fax: +61 8 94897700  
28  
29

30  
31 Key Words: hospitalisation, intellectual disability, autism, utilisation

32  
33 Word count: 2980  
34  
35  
36  
37  
38  
39  
40  
41  
42  
43  
44  
45  
46  
47  
48  
49  
50  
51  
52  
53  
54  
55  
56  
57  
58  
59  
60

1  
2 Article Summary

3 Focus:

- 4 • Children with an intellectual disability and/or autism often experience co-occurring morbidities.  
5 • The rate of hospital admissions experienced by these children compared with the rest of the population  
6 has not been previously described.  
7

8 Key Messages:

- 9 • The risk of hospitalisation for children with intellectual disability and/or autism is between 2  
10 and 10 times that of those unaffected.  
11 • The increased risk is greatest for those with severe intellectual disability without the presence  
12 of autism and least for those with autism and no intellectual disability.  
13 • Pre-term birth was a risk factor for later hospitalisation independently of year of birth or  
14 presence of intellectual disability or autism.  
15

16 Strengths and Limitations:

- 17 • A strength of our study has been the ability to link population-based data on childhood  
18 disability to hospital admissions.  
19 • The reasons for hospitalisation was not specifically investigated.  
20  
21  
22  
23

24 There are no additional data available.  
25  
26  
27  
28  
29  
30  
31  
32

33 Contributor's Statements

34 Ami Bebbington has contributed to the paper through involvement in study design, statistical  
35 analysis and interpretation and manuscript preparation.

36 Emma Glasson has contributed to the paper through involvement in study design, manuscript  
37 editing and revision and final review.

38 Jenny Bourke has contributed to the paper through involvement in study design, manuscript editing  
39 and revision and final approval.

40 Nicholas de Klerk has contributed to the paper through statistical design and interpretation and final  
41 manuscript review.

42 Helen Leonard has contributed to the paper through involvement in study design, statistical  
43 interpretation, manuscript editing, revision and final approval.  
44  
45  
46  
47  
48  
49  
50  
51  
52  
53  
54  
55  
56  
57  
58  
59  
60

**ABSTRACT**

Objectives: To describe the hospitalisation patterns in children with intellectual disability (ID) and/or autism spectrum disorder (ASD) after the first year of life and compare with those unaffected.

Design : Prospective cohort study using data linkage between births, intellectual disability and hospitalisation population-based data sets.

Setting : Western Australia

Participants : 416,611 individuals born between 1983 -1999 involving 1,027,962 hospital admission records. Five case categories were defined (mild/moderate ID, severe ID, biomedically caused ID, ASD with ID and ASD without ID) and compared with the remainder of children and young people in the birth cohort.

Primary Outcome Measures: Time to event analysis was used to compare time to hospitalisation and rate of hospitalisation between the different case-groups by estimating hazard ratios, accounting for birth year and pre-term birth status.

Results: The presence of ID and/or ASD was found to be associated with an increased risk of hospitalisation compared with the remainder of the population. The increase in risk was highest in those with severe ID and no ASD (HR=10.33, 95% CI 8.66 – 12.31). For those with ID of known biomedical cause or mild ID of unknown cause, the risk of hospitalisation was lower (HR=7.36, 95% CI 6.73 – 8.07 and HR=3.08, 95% CI 2.78 – 3.40, respectively). Those with ASDs had slightly increased risk (HR=2.82, 95% CI 2.26- 3.50 for those with ID and HR=2.09, 95% CI 1.85 – 2.36 for those without ID).

Conclusions: Children with an ID or ASD experience an increased risk of hospitalisation after the first year of life which varied from two to ten times that of the rest of the population. Findings can inform service planning or resource allocation for these children with special needs.

## Introduction

Intellectual disability (ID) affects 143 per 10,000 children(1) and is associated with a range of co-morbid health conditions.(2-4) It is heterogeneous,(5) and clustering of some medical conditions may be associated with particular disorders such as Down syndrome (6) or Prader-Willi syndrome.(7) Whilst epilepsy and sensory impairments often occur in association with specific syndromes or more severe cognitive impairment, conditions such as fractures or obesity, may develop as secondary to medication use, nutritional deficiency or lack of mobility.(2) Consequently, children with ID may face greater health challenges than typically developing children and use health care systems more frequently.(8) (9) Mental health problems are also common in people with ID (10) and in a Canadian adolescent and adult population with ID a high proportion of hospitalisations were attributed to the presence of psychiatric conditions.(11)

Autism spectrum disorders (ASD) are neurodevelopmental disorders characterized by difficulties in communication and social interaction and associated with repetitive or unusual behaviours.(12) ASD affects between 30 and 60 per 10,000 children(13) but nearly two thirds of children with ASDs also have ID.(14) Therefore, it is not surprising that children with ASD also often experience medical conditions such as epilepsy, bowel dysfunction and autoimmune disorders(15) and that their burden of hospitalisation is considered to be high.(16)

Differences in health care policies and pathways of care may impact on hospitalisation rates and service use for children with developmental disorders over time.(8, 17) For example, a recent Canadian study using administrative data (18) found that those with intellectual or developmental disabilities were more likely than those without to use emergency department services. Families with children affected by ID and/or ASDs may have particular difficulty in accessing primary and specialist health care services, leading to emergency department presentations and hospitalisation rates greater than those not affected by these disorders. A further Canadian study(19) found that

1 admissions to an emergency department for people with ID were more likely to be for a  
2  
3 psychobehavioural rather than a medical reason. However there is little population-based data  
4  
5 describing the pattern of hospitalisation among children with ID or ASD. This study uses data  
6  
7 linkage between health and disability data sets to investigate temporal trends in hospitalisation risk  
8  
9 for children with ID and children with ASD in Western Australia (WA) born 1983-1999. The aim  
10  
11 was to compare hospitalisation rates between children with ID and/or ASD to children without  
12  
13 these diagnoses, taking into account type of ID, birth cohort and preterm birth.  
14  
15  
16  
17  
18  
19  
20  
21

## 22 **Methods**

23  
24 Cases of ID were ascertained from the Intellectual Disability Exploring Answers (IDEA) database,  
25  
26 (20) a population-based register of individuals in WA with intellectual disability with or without an  
27  
28 autism spectrum disorder (ASD). The IDEA database receives information from the Disability  
29  
30 Services Commission (DSC) and from the Department of Education on individuals accessing  
31  
32 services or educational support for an intellectual disability in WA. The inclusion criteria for the  
33  
34 IDEA database are an indication of developmental delay before 18 years of age, a full IQ score  
35  
36 below 70, and significant deficits in adaptive behaviour. Cases are categorised into mild ID (IQ  
37  
38 between 55 and 69), moderate ID (IQ 40-54) and severe ID (IQ <40) but for the purposes of this  
39  
40 study, the mild and moderate ID groups were combined.  
41  
42  
43  
44  
45

46 As detailed previously (14) individuals with a diagnosis of an ASD (which includes autism,  
47  
48 Asperger syndrome or Pervasive Developmental Disorder not otherwise specified) were again  
49  
50 identified for this study from three sources; DSC, the Western Australian Register for Autism  
51  
52 Spectrum Disorders (a prospective data collection system for diagnostic information for cases  
53  
54 diagnosed since 1999), and/or from a case group born 1983-1995 and diagnosed by 1999 as  
55  
56 identified by a developmental paediatrician through case-note review. Using record linkage to the  
57  
58  
59  
60

1  
2  
3  
4  
5  
6  
7  
8  
9  
10  
11  
12  
13  
14  
15  
16  
17  
18  
19  
20  
21  
22  
23  
24  
25  
26  
27  
28  
29  
30  
31  
32  
33  
34  
35  
36  
37  
38  
39  
40  
41  
42  
43  
44  
45  
46  
47  
48  
49  
50  
51  
52  
53  
54  
55  
56  
57  
58  
59  
60

IDEA database, individuals identified with an ASD were sub-divided into those with or without an additional ID. Those for whom an ID status could not be determined were grouped with those with ID, so that the ASD without ID group contained only those definitively known not to have an ID. Individuals were further classified according to whether there was a known biomedical cause for the ID (such as a congenital or genetic conditions e.g. Down syndrome) or otherwise, since, if so there is most probably a greater likelihood of additional comorbidities and need for hospitalisation. Therefore five case categories were defined (mild/moderate ID, severe ID, biomedically caused ID, ASD with ID and ASD without ID) and compared with the remainder of children and young people born in WA between 1983 and 1999 who, at the time of case extraction, were unaffected by ID or ASD.

Information on hospitalisations from 1983-2005 was obtained from the WA Hospital Morbidity Data System, which is a statutory collection of data relating to all inpatient episodes to public, private and freestanding day hospitals in WA since 1970.(21) It contains ICD-coded diagnosis and procedure information. Linkage of all birth records 1983 to 1999 (collected via the Midwives Notification System, a statutory collection of pregnancy, birth and maternal data, recorded at the time of birth,(21)) to hospital and death data was undertaken independently at the WA Data Linkage Branch, where these data sets and others are linked regularly for the purposes of approved research projects (21) and a de-identified dataset was provided for analysis. Pre-term birth was defined as being born at less than 37 weeks gestation with gestational age obtained from the Midwives Notification System.

The analysis was restricted to hospitalisations occurring after the first year of life, thereby excluding individuals who did not survive to this age. The focus of this paper was on hospitalisations occurring in childhood and adolescence, an area lacking in quantitative, population-based research, rather than on the hospitalisations occurring peri-natally or in infancy, where our group has already

1  
2  
3  
4  
5  
6  
7  
8  
9  
10  
11  
12  
13  
14  
15  
16  
17  
18  
19  
20  
21  
22  
23  
24  
25  
26  
27  
28  
29  
30  
31  
32  
33  
34  
35  
36  
37  
38  
39  
40  
41  
42  
43  
44  
45  
46  
47  
48  
49  
50  
51  
52  
53  
54  
55  
56  
57  
58  
59  
60

quantified the increased burden of hospital care in children with ID (particularly biomedically-caused ID).(8) Hospitalisations occurring on the same day as another recorded hospitalisation, as well as those occurring as part of a nested transfer (the patient moves to another hospital during a stay in hospital) or a transfer sequence (the patient moves between hospitals successively without return home) were excluded.

While we refer to case and comparison groups throughout, this is a cohort study where the different case groups can be thought of as different ‘exposures’. Thus time to event analysis was used to compare time to hospitalisation and rate of hospitalisation between the groups, accounting for birth year and pre-term birth status. Hospitalisation rates were represented by incidence rates (IR) in terms of number of admissions per person per year. Group status was used as a categorical predictor of time to hospitalisation, producing Nelson-Aalen cumulative hazard estimates (which in this case represent expected number of hospitalisations experienced by a particular age). Hazard ratios from the Cox proportional hazards model were also used to investigate differences in risk of hospitalisation for the different case groups, with robust standard errors estimated to account for the multiple hospitalisations per individual. The effect of birth year was considered by stratifying year of birth into four eras being 1983- 1985, 1986-1989, 1990-1993 and 1994-1999, such that each group has equal number of records, using STATA’s **egen cut** command. In more specific modelling, birth year was included as an indicator variable for each individual year from 1983 to 1999 rather than banded. Ethical approval for this study was granted by the UWA Human Research Ethics Committee.

## Results

A dataset of 1,027,962 records representing the time at risk of hospitalisation for 416,611 children (Table 1) and young people born in WA from 1983 to 1999 was created. The total time at risk of hospitalisation in the cohort was 5,146,927.5 person years, while 3,818.6 person years were spent in



1 hospital (when not on the risk set for hospitalisation). The dataset contained 611,816 admissions to  
2 hospital with a median of one hospitalisation per subject, giving an incidence rate (IR) of 0.12  
3 admissions per person per year and median time to hospitalisation of 5.09 years (inter-quartile-  
4 range (IQR) 2.26 years – 13.65 years). By the age of ten years, 67.7% (95% CI 67.6% - 67.8%) of  
5 individuals had been hospitalised at least once, increasing to 85.0% (95% CI 84.9% - 85.1%) by the  
6 age of 18 years. On average, a child of 10 years in this cohort had been hospitalised 1.13 times  
7 (cumulative hazard) and a young person of 18 years, 1.90 times.

8  
9  
10  
11  
12  
13  
14  
15  
16  
17  
18  
19  
20 The highest rate of hospitalisation was observed for cases with severe ID but without an ASD (1.16  
21 hospitalisations/person-year, median time to hospitalisation 1.27 years) followed by cases with a  
22 biomedical cause of ID (0.84 hospitalisations/person year, median age of 1.37 years at first  
23 hospitalisation), mild or moderate ID without ASD (IR 0.34, median age 1.95 years), and ASDs  
24 with ID (IR 0.33, median age of 2.43 years at first hospitalisation). Those children with ASD and no  
25 ID had the lowest rate of hospitalisation of the case groups (IR 0.24, median age of 2.89 years at  
26 first hospitalisation) however their rate was still higher than that of the general population (IR 0.11,  
27 median age of 5.37 years at first hospitalisation). The highest rates of hospitalisation over time were  
28 experienced by those with severe ID and those with ID with a known biomedical cause with both  
29 groups experiencing five or more hospitalisations by five years of age (Figure 1). The similarity of  
30 curves between those with mild/moderate ID and ASD with ID can also be seen. All case groups  
31 experienced a higher estimated risk of hospitalisations than the unaffected individuals (Table 2).

32  
33  
34  
35  
36  
37  
38  
39  
40  
41  
42  
43  
44  
45  
46  
47  
48 Figure 2 shows the time to hospitalisation curves by case status for the four birth cohorts. The  
49 curves for the severe ID and the biomedically caused ID groups separate increasingly with  
50 advancing age and shows that the difference between these two groups has amplified over time. To  
51 measure this more precisely, interaction effects between case status and birth year were included in  
52 the Cox proportional hazards modelling and demonstrated that a significantly greater proportion of  
53  
54  
55  
56  
57  
58  
59  
60

1 the variability in time to hospitalisation was explained by the interaction model than by the main  
2  
3 effects model ( $p < 0.001$ ).  
4  
5  
6  
7

8 Figure 3 shows the hazard ratios over birth year from this interaction model in all six groups. The  
9  
10 great increase in risk for all groups compared with the general population is clear, as is the change  
11  
12 in hospitalisation relative risk over time both within each group and differing patterns between the  
13  
14 groups. In all groups, an increase in risk of hospitalisation was associated with a more recent birth  
15  
16 year, however, a small but steadily upwards trend was only observed in the general population and  
17  
18 the mild/moderate ID groups. Risk of hospitalisation per birth year fluctuated for those with ASDs  
19  
20 (with or without an ID) and for those with severe ID (though from a higher rate).  
21  
22  
23  
24  
25

26 There were 30,850 births before 37 weeks gestation (7.42% of all births in the cohort) who survived  
27  
28 the first year of life. Univariate comparison of time to hospitalisation for those born pre-term vs.  
29  
30 full term suggests that those born pre-term are admitted to hospital more frequently (IR 0.17 per  
31  
32 person-year for pre-term, 0.11 for full term), and earlier (median time to hospitalisation 3.01 years  
33  
34 for pre-term, 5.37 years for full-term) than those born full term. Including birth year and case status  
35  
36 factors in the Cox proportional hazards model showed that the hazard ratio for pre-term birth was  
37  
38 1.45 (95% CI 1.39 – 1.51,  $p < 0.001$ ), indicating that indeed, pre-term birth was a risk factor for later  
39  
40 hospitalisation independently of ID/ASD group or birth year. Including pre-term birth in the model  
41  
42 with case group and birth year interaction resulted in the hazard ratio curves shown in Figure 4  
43  
44 where the pre-term and at term lines are separated by a fixed distance which is the independent  
45  
46 effect of pre-term birth. The birth year and case-status differences persist after including this pre-  
47  
48 term birth effect.  
49  
50  
51  
52  
53  
54

## 55 Discussion

56  
57  
58  
59  
60

1  
2  
3  
4  
5  
6  
7  
8  
9  
10  
11  
12  
13  
14  
15  
16  
17  
18  
19  
20  
21  
22  
23  
24  
25  
26  
27  
28  
29  
30  
31  
32  
33  
34  
35  
36  
37  
38  
39  
40  
41  
42  
43  
44  
45  
46  
47  
48  
49  
50  
51  
52  
53  
54  
55  
56  
57  
58  
59  
60

This study quantified the rate of hospitalisations for children with an ID and/or ASD compared with the general population. Children diagnosed with ID and/or ASD experienced more hospitalisations than children with neither condition, and this effect persisted after taking into account birth year and pre-term birth status. Whilst overall hospitalisation rates differ by age, the rate of hospitalisation appears to decline with increasing age, particularly for the groups with a known biomedical cause and with severe ID of unknown cause, in contrast to the general population where the rate appears more constant. We also showed that the independent effect of pre-term birth on hospitalisation rates after one year of age is both an increase in frequency and earlier median age at hospitalisation, and this is consistent across all case groups.

The highest rate of hospitalisations occurred among the severe ID group, followed by those with a known biomedical cause for their ID, mild/moderate ID, ASD with ID, ASD without ID and then the comparison population. Thus the rate of hospitalisation was positively correlated with the severity of ID. Although recent studies have investigated the hospitalisation burden for children with autism,(16, 22) this is the first study to compare the hospitalisation patterns of children with ASD and ID with the rest of a total population over an extended time period. The current study was able to show the gradient of risk between the groups over the study period using the same data methods, whole-of-population sampling and controlling for interaction variables. We have shown an increasing discrepancy in hospitalisations over time between those with severe ID and no ASD and those with a biomedical cause, particularly at younger ages. One possible explanation is that in more recent years the aetiology of severe intellectual disability is being increasingly identified through new genetic techniques(23, 24) and thus there has been a diagnostic transfer from those with severe ID of unknown cause to those with a biomedical cause over time.

Various comorbid health conditions affect children with ID, including epilepsy, skin conditions, sensory loss, fractures and psychiatric disorders.(2-4) However apart from individual conditions

1 such as Down syndrome,(6) Rett syndrome,(25) Tuberous Sclerosis (26) and Angelman syndrome  
2  
3  
4 (27) there is a dearth of population-based data on medical co-morbidities associated with ID. Our  
5  
6 results would suggest that, although ID may be under-recognised and under-researched in  
7  
8 comparison to autism, its associated health burden should not be underestimated. In Canada it has  
9  
10 been shown that for ambulatory care sensitive (ACS) conditions, people with an ID are hospitalised  
11  
12 at six times the rate of those without an ID, with the rate ratio peaking at double this for those aged  
13  
14 30-39 years.(28) This may reflect a lack of appropriate and accessible primary care for people with  
15  
16 ID, particularly for those transitioning from the paediatric health care system. The highest  
17  
18 hospitalisation rate ratio was for epilepsy, known to be a common co-morbid condition for people  
19  
20 with ID (3), and a condition with a high level of impact on the life of the individual and their  
21  
22 family.(29)  
23  
24  
25  
26  
27

28 As with ID, various comorbid health conditions including gastrointestinal disorders, sleep  
29  
30 disturbances, sensory impairments and epilepsy also occur in ASD.(9, 30, 31) Although the  
31  
32 hospitalisation burden for children with ASD(16, 22) has previously been reported to be high we  
33  
34 have clearly shown in our present study that for children with ID the burden is considerably greater.  
35  
36 Behaviour and communication difficulties are reported to be significant barriers to utilising hospital  
37  
38 care for children with developmental disabilities (18, 32) and may increase the overall burden and  
39  
40 amount of family support necessary.(33, 34) Such challenging behaviours are known to be more  
41  
42 frequent in children with ASD than in those with ID and thus may increase the difficulty in their  
43  
44 accessing hospital care. Comorbid psychopathology is particularly common in children with ASD  
45  
46 (35) and the specific types of behaviours associated with ASD may discourage hospitalisation and  
47  
48 also shorten the length of stay.(36) More detailed research on the patterns of primary and secondary  
49  
50 health care use for people with an ID and/or ASD, according to health burden and  
51  
52 sociodemographic status is needed to unpack the associations between these disorders and increased  
53  
54 hospitalisation. Because of the increased risk of hospitalisations of children with ID and ASD  
55  
56  
57  
58  
59  
60

1 resource planners need to prioritise specialised care allocation for these populations. Lack of  
2  
3 medical and nursing staff trained in developmental disability management skills may have in the  
4  
5 past led to negative experiences, inadequate care and compounded problems.(37, 38) Qualitative  
6  
7 information from parents would help to understand these relationships and identify specific factors  
8  
9 that may affect or modify the risk of hospitalisation in these children. Such research would be  
10  
11 important in helping to inform resource planning.  
12  
13

14  
15  
16  
17 A strength of our study has been the ability to use population-based data on children's  
18  
19 hospitalisations and link these to sources of disability diagnosis (i.e. presence of ID or ASD). By  
20  
21 including birth year in the model we were able to account for these changes over time and show  
22  
23 how the patterns of risk of hospitalisation changed for individuals in the different categories. We  
24  
25 also accounted for possible confounding by pre-term birth status, known to be associated with  
26  
27 increased childhood hospitalisations(39) and demonstrated the consistent effect of pre-term birth  
28  
29 on hospitalisation rates across all case groups and the rest of the population. Weaknesses in our  
30  
31 study included exclusion from our modelling of hospitalisation history in the first year of life,  
32  
33 which may indeed change later risk of hospitalisation. This was lack of access to birth date data (for  
34  
35 privacy reasons) and to a change in coding practises in the WA healthcare system that occurred in  
36  
37 the mid-1990s.  
38  
39  
40  
41  
42

43  
44 Children with developmental disabilities have an increased risk of hospitalisation, the extent of  
45  
46 which varies according to the type of disability and level of intellectual functioning. Future research  
47  
48 should investigate how hospitalisations relate to underlying morbidities, common in intellectual  
49  
50 disability and less so in autism, and also consider the role of access to primary care in preventing  
51  
52 unnecessary hospitalisation. A better understanding of the patterns of hospitalisation for these  
53  
54 children will help establish resource planning opportunities for the specific services required to  
55  
56 meet their increasing needs.(40)  
57  
58  
59  
60

1  
2  
3  
4 Acknowledgements

5  
6 The authors are grateful to the Disability Services Commission, the Telethon Institute for Child  
7 Health Research, the Western Australia Department of Education, the Catholic Education Office  
8 and the Association of Independent Schools of Western Australia, for assistance with data  
9 collection for the IDEA database.  
10  
11

12  
13  
14 Funding Source: This study was supported by Program Grant #303189 from the Australian National  
15 Health and Medical Research Council (NHMRC) and NHMRC Senior Research Fellowship  
16 #572742 (Dr Helen Leonard).  
17  
18

19  
20  
21 Financial Disclosure Statement: Nothing to disclose  
22

23  
24 Conflict of Interest: The authors have no conflicts of interest.  
25  
26

27  
28 Contributorship statement: Ami Bebbington has contributed to the paper through involvement in  
29 study design, statistical analysis and interpretation and manuscript preparation.  
30

31 Emma Glasson has contributed to the paper through involvement in study design, manuscript  
32 editing and revision and final review.  
33

34 Jenny Bourke has contributed to the paper through involvement in study design, manuscript editing  
35 and revision and final approval.  
36

37 Nicholas de Klerk has contributed to the paper through statistical design and interpretation and final  
38 manuscript review.  
39

40 Helen Leonard has contributed to the paper through involvement in study design, statistical  
41 interpretation, manuscript editing, revision and final approval.  
42  
43

44  
45  
46 Data sharing statement: There are no additional data available.  
47  
48  
49  
50  
51  
52  
53  
54  
55  
56  
57  
58  
59  
60

## References

1. Leonard H, Petterson B, Bower C, et al. Prevalence of intellectual disability in Western Australia. *Paediatr Perinat Epidemiol*. 2003;**17**:58-67.
2. Jansen DE, Krol B, Groothoff JW, et al. People with intellectual disability and their health problems: a review of comparative studies. *J Intell Disabil Res*. 2004 Feb;**48**:93-102.
3. Oeseburg B, Dijkstra GJ, Groothoff JW, et al. Prevalence of chronic health conditions in children with intellectual disability: a systematic literature review. *Intellect Dev Disabil*. 2011 Apr;**49**:59-85.
4. van Schrojenstein Lantman-de Valk HMJ. Health in People with Intellectual Disabilities: Current Knowledge and Gaps in Knowledge. *J Appl Res Intellect Disabil*. 2005;**18**:325-333.
5. Leonard H, Wen X. The epidemiology of mental retardation: challenges and opportunities in the new millennium. *Ment Retard Dev D R*. 2002;**8**:117-134.
6. Thomas K, Girdler S, Bourke J, et al. Overview of Health Issues in School-aged Children with Down Syndrome. In: Urbano R, C., editor. *Int Rev Res Ment Ret: Academic Press*; 2010. p. p. 67-106.
7. Cassidy SB, Schwartz S, Miller JL, et al. Prader-Willi syndrome. *Genet Med*. 2012 Jan;**14**:10-26.
8. Williams K, Leonard H, Tursan d'Espaignet E, et al. Hospitalisations from birth to 5 years in a population cohort of Western Australian children with intellectual disability. *Arch Dis Child*. 2005 Dec;**90**:1243-1248.
9. Schieve LA, Gonzalez V, Boulet SL, et al. Concurrent medical conditions and health care use and needs among children with learning and behavioral developmental disabilities, National Health Interview Survey, 2006-2010. *Res Dev Disabil*. 2012 Mar-Apr;**33**:467-476.
10. Einfeld SL, Tonge BJ. Population prevalence of psychopathology in children and adolescents with intellectual disability: II. Epidemiological findings. *J Intell Disabil Res*. 1996 Apr;**40**:99-109.
11. Balogh RS, Hunter D, Ouellette-Kuntz H. Hospital Utilization among Persons with an Intellectual Disability, Ontario, Canada, 1995–2001. *J Appl Res Intellect Disabil*. 2005;**18**:181-190.
12. American Psychiatric Association. *Diagnostic and Statistical Manual of Mental Health Disorders 4th Edition*. Washington DC: American Psychiatric Association; 1994.
13. Leonard H, Dixon G, Whitehouse A, et al. Unpacking the complex nature of the autism epidemic. *Res Autism Spect Dis*. 2010 2010/12//;**4**:548-554.
14. Leonard H, Glasson E, Nassar N, et al. Autism and intellectual disability are differentially related to sociodemographic background at birth. *PLoS One*. 2011;**6**:e17875.
15. Kohane IS, McMurry A, Weber G, et al. The co-morbidity burden of children and young adults with autism spectrum disorders. *PLoS One*. 2012;**7**:e33224.
16. Lokhandwala T, Khanna R, West-Strum D. Hospitalization burden among individuals with autism. *J Autism Dev Disord*. 2012 Jan;**42**:95-104.
17. Thomas K, Bourke J, Girdler S, et al. Variation over time in medical conditions and health service utilization of children with Down syndrome. *J Pediatr*. 2011 Feb;**158**:194-200 e191.
18. Lunskey Y, Lin E, Balogh R, et al. Are adults with developmental disabilities more likely to visit EDs? *Am J Emerg Med*. 2011 May;**29**:463-465.
19. Lunskey Y, Balogh R, Khodaverdian A, et al. A Comparison of Medical and Psychobehavioral Emergency Department Visits Made by Adults with Intellectual Disabilities. *Emergency Medicine International*. 2012;**2012**:6.

- 1 20. Petterson B, Leonard H, Bourke J, et al. IDEA (Intellectual Disability Exploring  
2 Answers): a population-based database for intellectual disability in Western Australia. *Ann*  
3 *Hum Biol.* 2005 Mar-Apr;**32**:237-243.
- 4 21. Holman CD, Bass AJ, Rosman DL, et al. A decade of data linkage in Western  
5 Australia: strategic design, applications and benefits of the WA data linkage system. *Aust*  
6 *Health Rev.* 2008 Nov;**32**:766-777.
- 7 22. Atladottir HO, Schendel D, Lauritsen M, et al. Patterns of Contact with Hospital for  
8 Children with an Autism Spectrum Disorder: A Danish Register-Based Study. *J Autism*  
9 *Dev Disord.* 2012;**42**:1717-1728.
- 10 23. Jaillard S, Drunat Sv, Bendavid C, et al. Identification of gene copy number  
11 variations in patients with mental retardation using array-CGH: Novel syndromes in a large  
12 French series. *Eur J Med Genet.* 2010 2010/4//;**53**:66-75.
- 13 24. Koolen DA, Pfundt R, de Leeuw N, et al. Genomic microarrays in mental  
14 retardation: A practical workflow for diagnostic applications. *Hum Mutat.* 2009;**30**:283-292.
- 15 25. Young D, Bebbington A, de Klerk N, et al. The relationship between MECP2  
16 mutation type and health status and service use trajectories over time in a Rett syndrome  
17 population. *Res Autism Spect Dis.* 2011;**5**:442-449.
- 18 26. Osborne JP, Merrifield J, O'Callaghan FJ. Tuberous sclerosis--what's new? *Arch*  
19 *Dis Child.* 2008 Sep;**93**:728-731.
- 20 27. Williams CA, Driscoll DJ, Dagli AI. Clinical and genetic aspects of Angelman  
21 syndrome. *Genet Med.* 2010 Jul;**12**:385-395.
- 22 28. Balogh R, Brownell M, Ouellette-Kuntz H, et al. Hospitalisation rates for ambulatory  
23 care sensitive conditions for persons with and without an intellectual disability--a  
24 population perspective. *J Intell Disabil Res.* 2010 Sep;**54**:820-832.
- 25 29. Bowley C, Kerr M. Epilepsy and intellectual disability. *J Intell Disabil Res.* 2000  
26 Oct;**44 ( Pt 5)**:529-543.
- 27 30. Lauritsen MB, Mors O, Mortensen PB, et al. Medical disorders among inpatients  
28 with autism in Denmark according to ICD-8: a nationwide register-based study. *J Autism*  
29 *Dev Disord.* 2002 Apr;**32**:115-119.
- 30 31. Bolton PF. Medical conditions in autism spectrum disorders. *J Neurodev Disord.*  
31 2009 Jun;**1**:102-113.
- 32 32. van Schrojenstein Lantman-de Valk HMJ, van den Akker M, Maaskant MA, et al.  
33 Prevalence and incidence of health problems in people with intellectual disability. *J Intell*  
34 *Disabil Res.* 1997;**41**:42-51.
- 35 33. Hemsley B, Balandin S, Togher L. Narrative analysis of the hospital experience for  
36 older parents of people who cannot speak. *J Aging Stud.* 2007;**21**:239-254.
- 37 34. Iacono T, Davis R. The experiences of people with developmental disability in  
38 Emergency Departments and hospital wards. *Res Dev Disabil.* 2003 Jul-Aug;**24**:247-264.
- 39 35. Brereton AV, Tonge BJ, Einfeld SL. Psychopathology in children and adolescents  
40 with autism compared to young people with intellectual disability. *J Autism Dev Disord.*  
41 2006 Oct;**36**:863-870.
- 42 36. Scarpinato N, Bradley J, Kurbjun K, et al. Caring for the child with an autism  
43 spectrum disorder in the acute care setting. *J Spec Pediatr Nurs.* 2010 Jul;**15**:244-254.
- 44 37. Lennox N, Diggins J. Knowledge, skills and attitudes: Medical schools' coverage of  
45 an ideal curriculum on intellectual disability. *J Intellect Dev Dis.* 1999;**24**:341.
- 46 38. Ouellette-Kuntz H. Understanding Health Disparities and Inequities Faced by  
47 Individuals with Intellectual Disabilities. *J Appl Res Intellect Disabil.* 2005;**18**:113-121.
- 48 39. Petrou S, Mehta Z, Hockley C, et al. The impact of preterm birth on hospital  
49 inpatient admissions and costs during the first 5 years of life. *Pediatrics.* 2003  
50 Dec;**112**:1290-1297.



1  
2  
3  
4  
5  
6  
7  
8  
9  
10  
11  
12  
13  
14  
15  
16  
17  
18  
19  
20  
21  
22  
23  
24  
25  
26  
27  
28  
29  
30  
31  
32  
33  
34  
35  
36  
37  
38  
39  
40  
41  
42  
43  
44  
45  
46  
47  
48  
49  
50  
51  
52  
53  
54  
55  
56  
57  
58  
59  
60

40. Brownell MD, Derksen SA, Jutte DP, et al. Socio-economic inequities in children's injury rates: has the gradient changed over time? Can J Public Health. 2010 Nov-Dec;101 Suppl 3:S28-31.

For peer review only

**Table 1 – Distribution of individuals in different case groups**

| Case-comparison group status | Frequency | Percent | Cumulative |
|------------------------------|-----------|---------|------------|
| No ASD No ID                 | 409,454   | 98.28   | 98.28      |

|                    |         |      |       |
|--------------------|---------|------|-------|
| Mild/mod ID No ASD | 4,667   | 1.12 | 99.4  |
| Severe ID No ASD   | 293     | 0.07 | 99.47 |
| ASD & ID           | 767     | 0.18 | 99.66 |
| ASD No ID          | 475     | 0.11 | 99.77 |
| Biomedical ID      | 955     | 0.23 | 100   |
| Total              | 416,611 | 100  |       |

1  
2  
3  
4  
5  
6  
7  
8  
9  
10  
11  
12  
13  
14  
15  
16  
17  
18  
19  
20  
21  
22  
23  
24  
25  
26  
27  
28  
29  
30  
31  
32  
33  
34  
35  
36  
37  
38  
39  
40  
41  
42  
43  
44  
45  
46  
47  
48  
49  
50  
51  
52  
53  
54  
55  
56  
57  
58  
59  
60

For peer review only

Figure 1 – Nelson-Aalen Cumulative Hazard for Hospitalisation (number of hospitalisations expected by Age shown on x-axis)

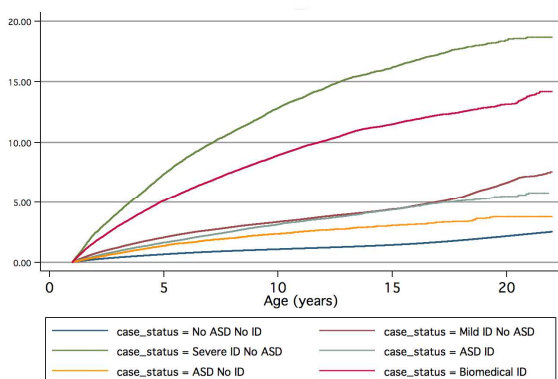

peer review only

**Table 2 - Cox Proportional Hazard Ratios for Hospitalisation by Case Group**

| Case group         | Hazard Ratio | Robust Standard Error | p-value* | 95% Confidence Interval |      |
|--------------------|--------------|-----------------------|----------|-------------------------|------|
| No ASD No ID       | 1.0          | -                     |          |                         |      |
| Mild/mod ID No ASD | 3.1          | 0.16                  | <0.001   | 2.8                     | 3.4  |
| Severe ID No ASD   | 10.3         | 0.93                  | <0.001   | 8.7                     | 12.3 |
| ASD & ID           | 2.8          | 0.31                  | <0.001   | 2.3                     | 3.5  |
| ASD No ID          | 2.1          | 0.13                  | <0.001   | 1.8                     | 2.4  |
| Biomedical ID      | 7.4          | 0.34                  | <0.001   | 6.7                     | 8.1  |

\*Wald test

For peer review only

**Figure 2 – Kaplan-Meier Curves showing proportion of individuals in each case group who have not been hospitalised by age, for each birth cohort**

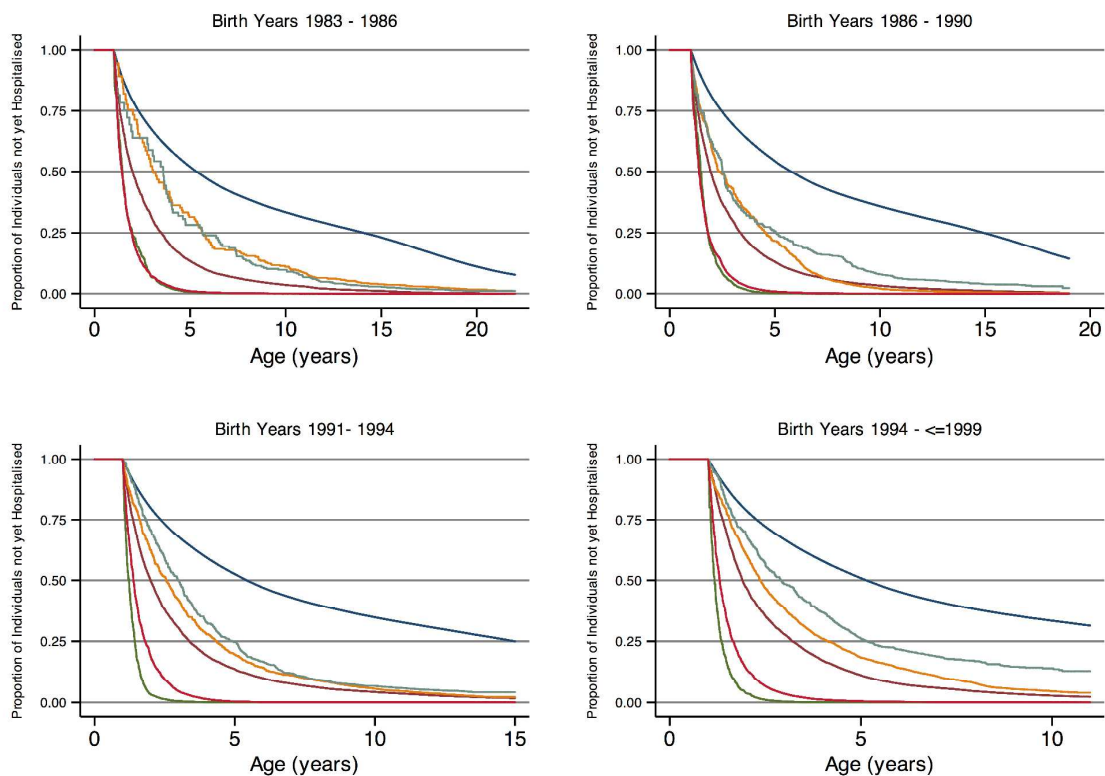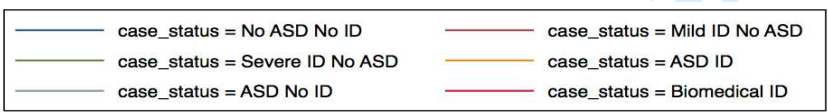

Figure 3 – Hazard Ratios from multivariate interaction model by birth year and case group status

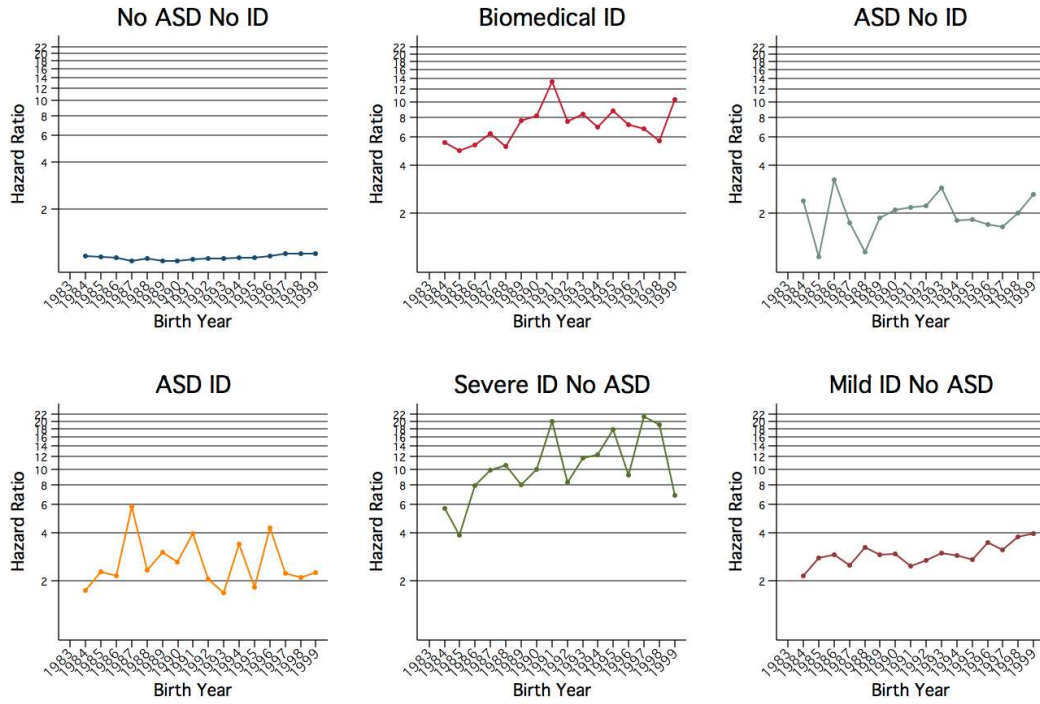

View only

Figure 4 – Hazard Ratio for hospitalisation risk associated with birth year, pre-term birth and case group status from stratified model

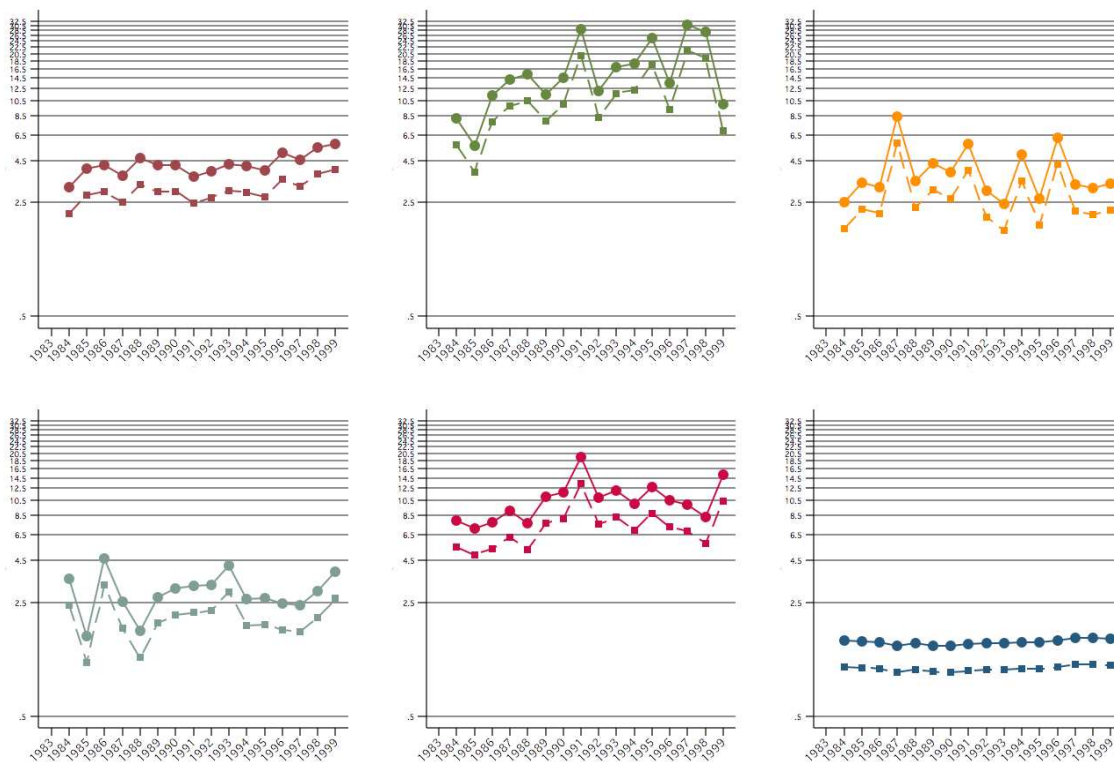

Legend for figure 4

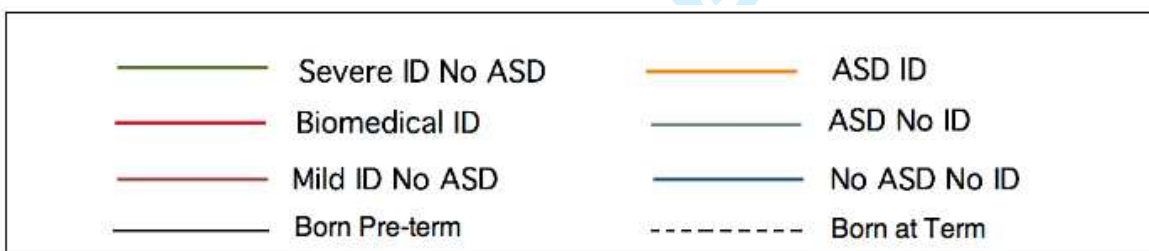

1  
2  
3  
4  
5  
6  
7  
8  
9  
10  
11  
12  
13  
14  
15  
16  
17  
18  
19  
20  
21  
22  
23  
24  
25  
26  
27  
28  
29  
30  
31  
32  
33  
34  
35  
36  
37  
38  
39  
40  
41  
42  
43  
44  
45  
46  
47  
48  
49  
50  
51  
52  
53  
54  
55  
56  
57  
58  
59  
60

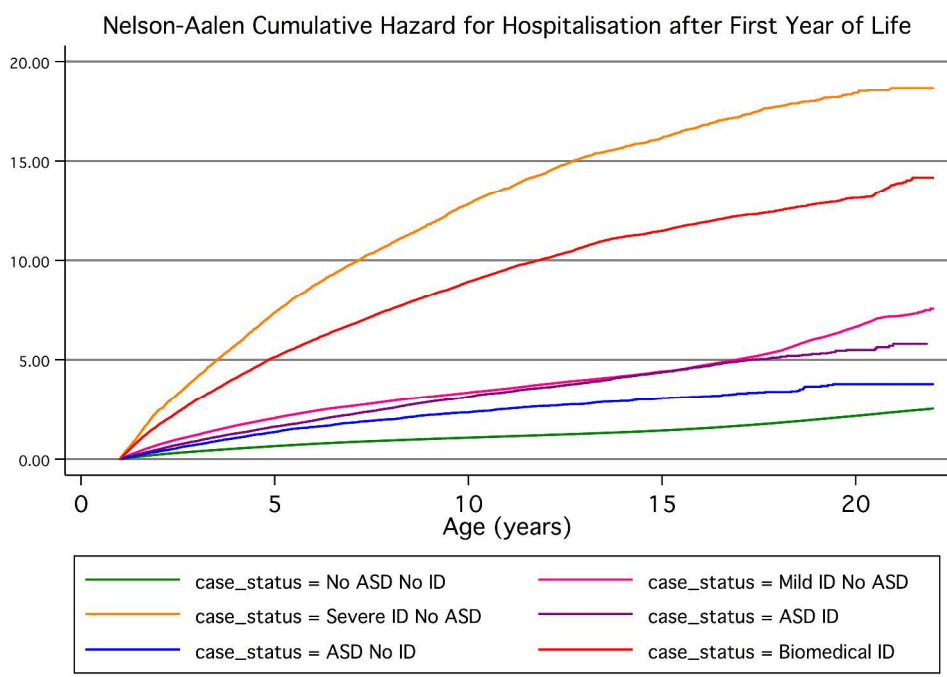

583x420mm (300 x 300 DPI)

View only



1  
2  
3  
4  
5  
6  
7  
8  
9  
10  
11  
12  
13  
14  
15  
16  
17  
18  
19  
20  
21  
22  
23  
24  
25  
26  
27  
28  
29  
30  
31  
32  
33  
34  
35  
36  
37  
38  
39  
40  
41  
42  
43  
44  
45  
46  
47  
48  
49  
50  
51  
52  
53  
54  
55  
56  
57  
58  
59  
60

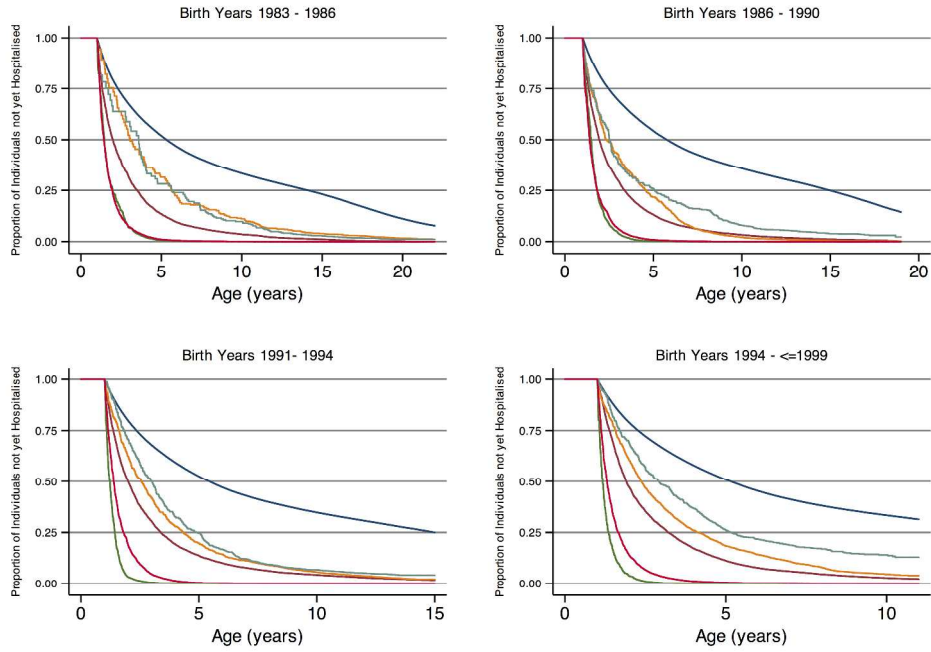

see attached legend file.  
349x254mm (300 x 300 DPI)

view only

1  
2  
3  
4  
5  
6  
7  
8  
9  
10  
11  
12  
13  
14  
15  
16  
17  
18  
19  
20  
21  
22  
23  
24  
25  
26  
27  
28  
29  
30  
31  
32  
33  
34  
35  
36  
37  
38  
39  
40  
41  
42  
43  
44  
45  
46  
47  
48  
49  
50  
51  
52  
53  
54  
55  
56  
57  
58  
59  
60

|                                                                                   |                  |                                                                                    |              |
|-----------------------------------------------------------------------------------|------------------|------------------------------------------------------------------------------------|--------------|
|  | Severe ID No ASD |  | ASD ID       |
|  | Biomedical ID    |  | ASD No ID    |
|  | Mild ID No ASD   |  | No ASD No ID |

164x35mm (300 x 300 DPI)

Or peer review only

1  
2  
3  
4  
5  
6  
7  
8  
9  
10  
11  
12  
13  
14  
15  
16  
17  
18  
19  
20  
21  
22  
23  
24  
25  
26  
27  
28  
29  
30  
31  
32  
33  
34  
35  
36  
37  
38  
39  
40  
41  
42  
43  
44  
45  
46  
47  
48  
49  
50  
51  
52  
53  
54  
55  
56  
57  
58  
59  
60

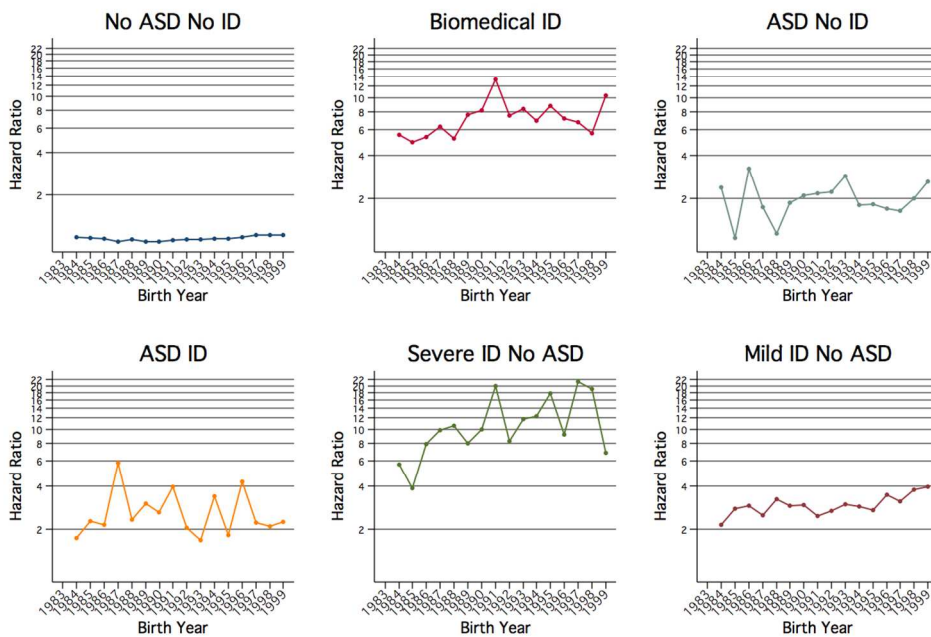

115x80mm (300 x 300 DPI)

view only

1  
2  
3  
4  
5  
6  
7  
8  
9  
10  
11  
12  
13  
14  
15  
16  
17  
18  
19  
20  
21  
22  
23  
24  
25  
26  
27  
28  
29  
30  
31  
32  
33  
34  
35  
36  
37  
38  
39  
40  
41  
42  
43  
44  
45  
46  
47  
48  
49  
50  
51  
52  
53  
54  
55  
56  
57  
58  
59  
60

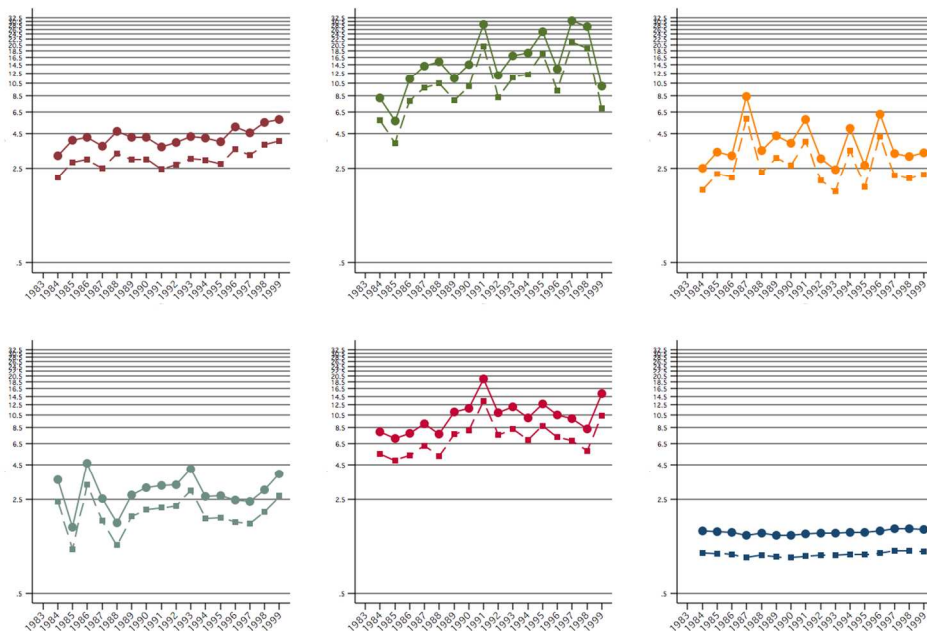

see attached Legend file.  
115x80mm (300 x 300 DPI)

view only

1  
2  
3  
4  
5  
6  
7  
8  
9  
10  
11  
12  
13  
14  
15  
16  
17  
18  
19  
20  
21  
22  
23  
24  
25  
26  
27  
28  
29  
30  
31  
32  
33  
34  
35  
36  
37  
38  
39  
40  
41  
42  
43  
44  
45  
46  
47  
48  
49  
50  
51  
52  
53  
54  
55  
56  
57  
58  
59  
60

|                                                                                   |                  |                                                                                    |               |
|-----------------------------------------------------------------------------------|------------------|------------------------------------------------------------------------------------|---------------|
|  | Severe ID No ASD |  | ASD ID        |
|  | Biomedical ID    |  | ASD No ID     |
|  | Mild ID No ASD   |  | No ASD No ID  |
|  | Born at Term     |  | Born Pre-Term |

164x35mm (300 x 300 DPI)

Or peer review only

STROBE 2007 (v4) Statement—Checklist of items that should be included in reports of cohort studies

| Section/Topic             | Item # | Recommendation                                                                                                                                                                       | Reported on page # |
|---------------------------|--------|--------------------------------------------------------------------------------------------------------------------------------------------------------------------------------------|--------------------|
| Title and abstract        | 1      | (a) Indicate the study’s design with a commonly used term in the title or the abstract                                                                                               | 1                  |
|                           |        | (b) Provide in the abstract an informative and balanced summary of what was done and what was found                                                                                  | 2                  |
| <b>Introduction</b>       |        |                                                                                                                                                                                      | <b>3</b>           |
| Background/rationale      | 2      | Explain the scientific background and rationale for the investigation being reported                                                                                                 | 4 – 5              |
| Objectives                | 3      | State specific objectives, including any prespecified hypotheses                                                                                                                     | 5                  |
| <b>Methods</b>            |        |                                                                                                                                                                                      |                    |
| Study design              | 4      | Present key elements of study design early in the paper                                                                                                                              | 7                  |
| Setting                   | 5      | Describe the setting, locations, and relevant dates, including periods of recruitment, exposure, follow-up, and data collection                                                      | 5-7                |
| Participants              | 6      | (a) Give the eligibility criteria, and the sources and methods of selection of participants. Describe methods of follow-up                                                           | 5-7                |
|                           |        | (b) For matched studies, give matching criteria and number of exposed and unexposed                                                                                                  | not applicable     |
| Variables                 | 7      | Clearly define all outcomes, exposures, predictors, potential confounders, and effect modifiers. Give diagnostic criteria, if applicable                                             | 6-7                |
| Data sources/ measurement | 8*     | For each variable of interest, give sources of data and details of methods of assessment (measurement). Describe comparability of assessment methods if there is more than one group | 6-7                |
| Bias                      | 9      | Describe any efforts to address potential sources of bias                                                                                                                            | 4-7                |
| Study size                | 10     | Explain how the study size was arrived at                                                                                                                                            | 5-7                |
| Quantitative variables    | 11     | Explain how quantitative variables were handled in the analyses. If applicable, describe which groupings were chosen and why                                                         | 7                  |
| Statistical methods       | 12     | (a) Describe all statistical methods, including those used to control for confounding                                                                                                | 7                  |
|                           |        | (b) Describe any methods used to examine subgroups and interactions                                                                                                                  | not applicable     |
|                           |        | (c) Explain how missing data were addressed                                                                                                                                          | not applicable     |
|                           |        | (d) If applicable, explain how loss to follow-up was addressed                                                                                                                       | not applicable     |
|                           |        | (e) Describe any sensitivity analyses                                                                                                                                                | not applicable     |
| <b>Results</b>            |        |                                                                                                                                                                                      |                    |

|                          |     |                                                                                                                                                                                                              |                |
|--------------------------|-----|--------------------------------------------------------------------------------------------------------------------------------------------------------------------------------------------------------------|----------------|
| Participants             | 13* | (a) Report numbers of individuals at each stage of study—eg numbers potentially eligible, examined for eligibility, confirmed eligible, included in the study, completing follow-up, and analysed            | 7-8            |
|                          |     | (b) Give reasons for non-participation at each stage                                                                                                                                                         | not applicable |
|                          |     | (c) Consider use of a flow diagram                                                                                                                                                                           | not available  |
| Descriptive data         | 14* | (a) Give characteristics of study participants (eg demographic, clinical, social) and information on exposures and potential confounders                                                                     | table 1        |
|                          |     | (b) Indicate number of participants with missing data for each variable of interest                                                                                                                          | not applicable |
|                          |     | (c) Summarise follow-up time (eg, average and total amount)                                                                                                                                                  | 7-8            |
| Outcome data             | 15* | Report numbers of outcome events or summary measures over time                                                                                                                                               | 8-9            |
| Main results             | 16  | (a) Give unadjusted estimates and, if applicable, confounder-adjusted estimates and their precision (eg, 95% confidence interval). Make clear which confounders were adjusted for and why they were included | 9-10           |
|                          |     | (b) Report category boundaries when continuous variables were categorized                                                                                                                                    | 7              |
|                          |     | (c) If relevant, consider translating estimates of relative risk into absolute risk for a meaningful time period                                                                                             | 8              |
| Other analyses           | 17  | Report other analyses done—eg analyses of subgroups and interactions, and sensitivity analyses                                                                                                               | 8              |
| <b>Discussion</b>        |     |                                                                                                                                                                                                              |                |
| Key results              | 18  | Summarise key results with reference to study objectives                                                                                                                                                     | 10             |
| <b>Limitations</b>       |     |                                                                                                                                                                                                              |                |
| Interpretation           | 20  | Give a cautious overall interpretation of results considering objectives, limitations, multiplicity of analyses, results from similar studies, and other relevant evidence                                   | 12             |
| Generalisability         | 21  | Discuss the generalisability (external validity) of the study results                                                                                                                                        | 12             |
| <b>Other information</b> |     |                                                                                                                                                                                                              |                |
| Funding                  | 22  | Give the source of funding and the role of the funders for the present study and, if applicable, for the original study on which the present article is based                                                | 13             |

\*Give information separately for cases and controls in case-control studies and, if applicable, for exposed and unexposed groups in cohort and cross-sectional studies.

**Note:** An Explanation and Elaboration article discusses each checklist item and gives methodological background and published examples of transparent reporting. The STROBE checklist is best used in conjunction with this article (freely available on the Web sites of PLoS Medicine at <http://www.plosmedicine.org/>, Annals of Internal Medicine at <http://www.annals.org/>, and Epidemiology at <http://www.epidem.com/>). Information on the STROBE Initiative is available at [www.strobe-statement.org](http://www.strobe-statement.org).



**Hospitalisation rates for children with intellectual disability  
or autism born in Western Australia 1983 – 1999: a  
population-based cohort study**

|                                 |                                                                                                                                                                                                                                                                                                                                                                                                                                                                                                                                                                                                                                                                                                                                                           |
|---------------------------------|-----------------------------------------------------------------------------------------------------------------------------------------------------------------------------------------------------------------------------------------------------------------------------------------------------------------------------------------------------------------------------------------------------------------------------------------------------------------------------------------------------------------------------------------------------------------------------------------------------------------------------------------------------------------------------------------------------------------------------------------------------------|
| Journal:                        | <i>BMJ Open</i>                                                                                                                                                                                                                                                                                                                                                                                                                                                                                                                                                                                                                                                                                                                                           |
| Manuscript ID:                  | bmjopen-2012-002356.R1                                                                                                                                                                                                                                                                                                                                                                                                                                                                                                                                                                                                                                                                                                                                    |
| Article Type:                   | Research                                                                                                                                                                                                                                                                                                                                                                                                                                                                                                                                                                                                                                                                                                                                                  |
| Date Submitted by the Author:   | 24-Jan-2013                                                                                                                                                                                                                                                                                                                                                                                                                                                                                                                                                                                                                                                                                                                                               |
| Complete List of Authors:       | Bebbington, Ami; Telethon Institute for Child Health Research, Centre for Child Health Research, University of Western Australia<br>Glasson, Emma; Telethon Institute for Child Health Research, Centre for Child Health Research, University of Western Australia; The University of Western Australia, School of Population Health Research<br>Bourke, Jenny; Telethon Institute for Child Health Research, Centre for Child Health Research, University of Western Australia<br>de Klerk, Nicholas; Telethon Institute for Child Health Research, Centre for Child Health Research, University of Western Australia<br>Leonard, Helen; Telethon Institute for Child Health Research, Centre for Child Health Research, University of Western Australia |
| <b>Primary Subject Heading</b>: | Epidemiology                                                                                                                                                                                                                                                                                                                                                                                                                                                                                                                                                                                                                                                                                                                                              |
| Secondary Subject Heading:      | Paediatrics, Health services research, Public health                                                                                                                                                                                                                                                                                                                                                                                                                                                                                                                                                                                                                                                                                                      |
| Keywords:                       | EPIDEMIOLOGY, Developmental neurology & neurodisability < PAEDIATRICS, PUBLIC HEALTH                                                                                                                                                                                                                                                                                                                                                                                                                                                                                                                                                                                                                                                                      |
|                                 |                                                                                                                                                                                                                                                                                                                                                                                                                                                                                                                                                                                                                                                                                                                                                           |

SCHOLARONE™  
Manuscripts



1  
2  
3  
4  
5 Title: Hospitalisation rates for children with intellectual disability or autism born in Western  
6 Australia 1983 – 1999: a population-based cohort study  
7

8 Ami Bebbington<sup>1</sup>, BSc (Hons)  
9 Emma Glasson<sup>1,2</sup>, PhD  
10 Jenny Bourke<sup>1</sup>, MPH  
11 Nicholas de Klerk<sup>1</sup>, PhD  
12 Helen Leonard,<sup>1</sup> MBChB MPH  
13

14  
15 <sup>1</sup> Telethon Institute for Child Health Research, Centre for Child Health Research, The University of  
16 Western Australia

17 <sup>2</sup> School of Population Health Research, The University of Western Australia  
18  
19

20  
21 Corresponding author: Helen Leonard  
22 Telethon Institute for Child Health Research  
23 PO Box 855,  
24 West Perth 6872  
25 Western Australia  
26 Phone: +61 8 94897790, mobile 0419956946  
27 Fax: +61 8 94897700  
28  
29

30  
31 Key Words: hospitalisation, intellectual disability, autism, utilisation  
32

33 Word count: 3331  
34  
35  
36  
37  
38  
39  
40  
41  
42  
43  
44  
45  
46  
47  
48  
49  
50  
51  
52  
53  
54  
55  
56  
57  
58  
59  
60

1  
2 Article Summary

3 Focus:

- 4 • Children with an intellectual disability and/or autism often experience co-occurring morbidities.  
5 • The rate of hospital admissions experienced by these children compared with the rest of the population  
6 has not been detailed previously.  
7

8 Key Messages:

- 9 • The risk of hospitalisation for children with intellectual disability or autism is up to ten times  
10 that of those unaffected.  
11 • The risk is greatest for those with severe intellectual disability without the presence of autism.  
12 • Pre-term birth was a risk factor for later hospitalisation independently of year of birth or  
13 presence of intellectual disability or autism.  
14

15 Strengths and Limitations:

- 16 • A strength of our study has been the ability to use population-based data on children's  
17 hospitalisations and link these to sources providing information on the presence of intellectual  
18 disability or autism spectrum disorders.  
19 • One weakness in the study included the exclusion from our modelling of hospitalisation history  
20 in the first year of life.  
21  
22  
23  
24  
25  
26  
27

28 There are no additional data available.  
29  
30  
31  
32  
33  
34  
35

36 Contributor's Statements

37 Ami Bebbington has contributed to the paper through involvement in study design, statistical  
38 analysis and interpretation and manuscript preparation.

39 Emma Glasson has contributed to the paper through involvement in study design, manuscript  
40 editing and revision and final review.

41 Jenny Bourke has contributed to the paper through involvement in study design, manuscript editing  
42 and revision and final approval.

43 Nicholas de Klerk has contributed to the paper through statistical design and interpretation and final  
44 manuscript review.

45 Helen Leonard has contributed to the paper through involvement in study design, statistical  
46 interpretation, manuscript editing, revision and final approval.  
47  
48  
49  
50  
51  
52  
53  
54  
55  
56  
57  
58  
59  
60

**ABSTRACT**

Objectives: To describe the hospitalisation patterns in children with intellectual disability (ID) and/or autism spectrum disorder (ASD) after the first year of life and compare with those unaffected.

Design : Prospective cohort study using data linkage between health, intellectual disability and hospitalisation population-based data sets.

Setting : Western Australia

Participants : 416,611 individuals born between 1983 -1999 involving 1,027,962 hospital admission records. Five case categories were defined (mild/moderate ID, severe ID, biomedically caused ID, ASD with ID and ASD without ID) and compared with the remainder of children and young people

Primary and Secondary Outcome Measures: Time to event analysis was used to compare time to hospitalisation and rate of hospitalisation between the different case-groups by estimating hazard ratios, accounting for birth year and pre-term birth status.

Results: ID and/or ASD were found to be associated with an increased risk of hospitalisation compared with the remainder of the population. The increase in risk was highest in those with severe ID and no ASD (HR=10.33, 95% CI 8.66 – 12.31). For those with ID of known biomedical cause or mild ID of unknown cause, the risk of hospitalisation was lower (HR=7.36, 95% CI 6.73 – 8.07 and HR=3.08, 95% CI 2.78 – 3.40, respectively). Those with ASDs had slightly increased risk (HR=2.82, 95% CI 2.26- 3.50 for those with ID and HR=2.09, 95% CI 1.85 – 2.36 for those without ID).

Conclusions: Children with an ID or ASD experience an increased risk of hospitalisation after the first year of life which varied from two to ten times that of the rest of the population. Findings can inform service planning or resource allocation for these children with special needs.

## Introduction

Intellectual disability (ID) affects 143 per 10,000 children<sup>1</sup> and is associated with a range of co-morbid health conditions.<sup>2-4</sup> It is heterogeneous,<sup>5</sup> and clustering of some medical conditions may be associated with particular disorders such as Down syndrome<sup>6</sup> or Prader-Willi syndrome.<sup>7</sup> Whilst epilepsy and sensory impairments often occur in association with specific syndromes or more severe cognitive impairment, conditions such as fractures or obesity, may develop as secondary to medication use, nutritional deficiency or lack of mobility.<sup>2</sup> Consequently, children with ID may face greater health challenges than typically developing children and use health care systems more frequently.<sup>8-9</sup> Mental health problems are also common in people with ID.<sup>10</sup> For instance, in a Canadian adolescent and adult population with ID a high proportion of hospitalisations were attributed to the presence of psychiatric conditions.<sup>11</sup>

Autism spectrum disorders (ASD) are neurodevelopmental disorders characterized by difficulties in communication and social interaction and associated with repetitive or unusual behaviours.<sup>12</sup> ASD was reported to affect 30 and 60 per 10,000 children in 2003.<sup>13</sup> However a more recent report from the US Autism and Developmental Disabilities Monitoring (ADDM) Network suggests a higher prevalence of 113 per 10,000.<sup>14</sup> Moreover nearly two thirds of children with ASDs also have ID.<sup>15</sup> Therefore, it is not surprising that children with ASD also often experience medical conditions such as epilepsy, bowel dysfunction and autoimmune disorders<sup>16</sup> and that their burden of hospitalisation is considered to be high.<sup>17</sup>

Differences in health care policies and pathways of care may impact on hospitalisation rates and service use for children with developmental disorders over time.<sup>8, 18</sup> For example, a recent Canadian study using administrative data<sup>19</sup> found that those with intellectual or developmental disabilities were more likely than those without to use emergency department services. Families with children affected by ID and/or ASDs may have particular difficulty in accessing primary and

1 specialist health care services, leading to emergency department presentations and hospitalisation  
2 rates greater than those not affected by these disorders. A further Canadian study<sup>20</sup> found that  
3 admissions to an emergency department for people with ID were more likely to be for a  
4 psychobehavioural rather than a medical reason. However there is little population-based data  
5 describing the pattern of hospitalisation among children with ID or ASD. This study uses data  
6 linkage between health and disability data sets to investigate temporal trends in hospitalisation risk  
7 for children with ID and children with ASD in Western Australia (WA) born 1983-1999. The aim  
8 was to compare hospitalisation rates between children with ID and/or ASD to children without  
9 these diagnoses, taking into account type of ID, birth cohort and preterm birth.  
10  
11  
12  
13  
14  
15  
16  
17  
18  
19  
20  
21  
22  
23  
24  
25

## 26 **Methods**

27  
28 Cases of ID were ascertained from the Intellectual Disability Exploring Answers (IDEA) database,  
29 <sup>21</sup> a population-based register of individuals in WA with intellectual disability with or without an  
30 autism spectrum disorder (ASD). The IDEA database receives information from the Disability  
31 Services Commission (DSC) and from the Department of Education on individuals accessing  
32 services or educational support for an intellectual disability in WA. The inclusion criteria for the  
33 IDEA database are an indication of developmental delay before 18 years of age, a full IQ score  
34 below 70, and significant deficits in adaptive behaviour. Cases are categorised into mild ID (IQ  
35 between 55 and 69), moderate ID (IQ 40-54) and severe ID (IQ <40) but for the purposes of this  
36 study, the mild and moderate ID groups were combined.  
37  
38  
39  
40  
41  
42  
43  
44  
45  
46  
47  
48  
49

50 As detailed previously<sup>15</sup> individuals with a diagnosis of an ASD (which includes autism, Asperger  
51 syndrome or Pervasive Developmental Disorder not otherwise specified) were again identified for  
52 this study from three sources; DSC, the Western Australian Register for Autism Spectrum  
53 Disorders (a prospective data collection system for diagnostic information for cases diagnosed since  
54  
55  
56  
57  
58  
59  
60

1  
2 1999), and/or from a case group born 1983-1995 and diagnosed by 1999 as identified by a  
3  
4 developmental paediatrician through case-note review. Using record linkage to the IDEA database,  
5  
6 individuals identified with an ASD were sub-divided into those with or without an additional ID.  
7  
8 Those for whom an ID status could not be determined were grouped with those with ID, so that the  
9  
10 ASD without ID group contained only those definitively known not to have an ID. Individuals were  
11  
12 further classified according to whether there was a known biomedical cause for the ID (such as a  
13  
14 congenital or genetic condition e.g. Down syndrome) or otherwise. This categorisation is based on  
15  
16 the information in the Intellectual Disability (IDEA) Database<sup>21</sup> where assignment of diagnosis was  
17  
18 made by the attending clinician according to an AAMR classification system. In this study we  
19  
20 followed a similar protocol to that used in our own<sup>15,22</sup> and previous published research.<sup>23</sup>  
21  
22 Biomedical diagnoses include genetic conditions (chromosomal and Mendelian), recognized  
23  
24 teratogenic effects such as congenital infections and birth defects, neonatal and postneonatal  
25  
26 infections, trauma and other events (e.g. neoplasm). However we excluded diagnostic categories  
27  
28 (e.g. preterm birth) that are associated with but are not necessarily a sufficient cause of ID and those  
29  
30 where a genetic diagnosis might be suspected but not clinically or genetically confirmed.  
31  
32 Therefore five case categories were defined (mild/moderate ID, severe ID, biomedically caused ID,  
33  
34 ASD with ID and ASD without ID) and compared with the remainder of children and young people  
35  
36 born in WA between 1983 and 1999 who, at the time of case extraction, were unaffected by ID or  
37  
38 ASD.  
39  
40  
41  
42  
43  
44  
45

46 Information on hospitalisations from 1 January, 1983- 31 December, 2004 was obtained from the  
47  
48 WA Hospital Morbidity Data System, which is a statutory collection of data relating to all inpatient  
49  
50 episodes to public, private and freestanding day hospitals in WA since 1970.<sup>24</sup> It contains ICD-  
51  
52 coded diagnosis and procedure information. WA also has a statutory collection of pregnancy, birth  
53  
54 and maternal data, recorded at the time of birth, known as the Midwives Notification System.<sup>24</sup>  
55  
56

57 Linkage of all birth records 1983 to 1999 to hospital and death data was undertaken independently  
58  
59  
60

1 at the WA Data Linkage Branch, where these data sets and others are linked regularly for the  
2 purposes of approved research projects.<sup>24</sup> A de-identified dataset was provided for this analysis in  
3 which all individuals were followed from birth through to either death or the censoring date of 31  
4 December, 2004. Pre-term birth was defined as being born at less than 37 weeks gestation with  
5 gestational age obtained from the Midwives Notification System.  
6  
7  
8  
9  
10  
11

12  
13  
14  
15 The analysis was restricted to hospitalisations occurring after the first year of life, thereby excluding  
16 individuals who did not survive to this age. The focus of this paper was on hospitalisations  
17 occurring in childhood and adolescence, an area lacking in quantitative, population-based research,  
18 rather than on the hospitalisations occurring peri-natally or in infancy, where our group has already  
19 quantified the increased burden of hospital care in children with ID (particularly biomedically-  
20 caused ID).<sup>8</sup> Hospitalisations occurring on the same day as another recorded hospitalisation, as  
21 well as those occurring as part of a nested transfer (the patient moves to another hospital during a  
22 stay in hospital) or a transfer sequence (the patient moves between hospitals successively without  
23 return home) were considered as a single event.  
24  
25  
26  
27  
28  
29  
30  
31  
32  
33  
34  
35  
36

37 While we refer to case and comparison groups throughout, this is a cohort study where the different  
38 case groups can be thought of as different 'exposures'. Thus time to event analysis (which allows  
39 for varying individual time at risk) was used to compare time to hospitalisation and rate of  
40 hospitalisation between the groups, accounting for birth year and pre-term birth status.  
41  
42  
43  
44

45 Hospitalisation rates were represented by incidence rates (IR) in terms of number of admissions per  
46 person per year. Group status was used as a categorical predictor of time to hospitalisation,  
47 producing Nelson-Aalen cumulative hazard estimates (which in this case represent expected  
48 number of hospitalisations experienced by a particular age). Hazard ratios from the Cox  
49 proportional hazards model were also used to investigate differences in risk of hospitalisation for  
50 the different case groups, with robust standard errors estimated to account for the multiple  
51  
52  
53  
54  
55  
56  
57  
58  
59  
60

1 hospitalisations per individual. The effect of birth year was considered by stratifying year of birth  
2 into four eras being 1983- 1985, 1986-1989, 1990-1993 and 1994-1999, such that each group has  
3 equal number of records, using STATA's **egen cut** command. In more specific modelling, birth  
4 year was included as an indicator variable for each individual year from 1983 to 1999 rather than  
5 banded. Ethical approval for this study was granted by the UWA Human Research Ethics  
6 Committee.  
7  
8  
9  
10  
11  
12  
13  
14  
15  
16  
17

## 18 Results

19 A dataset of 1,027,962 records representing the time at risk of hospitalisation for 416,611 children  
20 (Table 1) and young people born in WA from 1983 to 1999 was created. The total time at risk of  
21 hospitalisation in the cohort was 5,146,927.5 person years, while 3,818.6 person years were spent in  
22 hospital (when not on the risk set for hospitalisation). Individual time at risk varied from 5 years  
23 (for those born in 1999) to 21 years (for those born in 1983). The dataset contained 611,816  
24 admissions to hospital with a median of one hospitalisation per subject, giving an incidence rate  
25 (IR) of 0.12 admissions per person per year and median time to hospitalisation of 5.09 years (inter-  
26 quartile-range (IQR) 2.26 years – 13.65 years). By the age of ten years, 67.7% (95% CI 67.6% -  
27 67.8%) of individuals had been hospitalised at least once, increasing to 85.0% (95% CI 84.9% -  
28 85.1%) by the age of 18 years. On average, a child of 10 years in this cohort had been hospitalised  
29 1.13 times (cumulative hazard) and a young person of 18 years, 1.90 times.  
30  
31  
32  
33  
34  
35  
36  
37  
38  
39  
40  
41  
42  
43  
44  
45

46 The highest rate of hospitalisation was observed for cases with severe ID but without an ASD (1.16  
47 hospitalisations/person-year, median time to hospitalisation 1.27 years) followed by cases with a  
48 biomedical cause of ID (0.84 hospitalisations/person year, median age of 1.37 years at first  
49 hospitalisation), mild or moderate ID without ASD (IR 0.34, median age 1.95 years), and ASDs  
50 with ID (IR 0.33, median age of 2.43 years at first hospitalisation). Those children with ASD and no  
51 ID had the lowest rate of hospitalisation of the case groups (IR 0.24, median age of 2.89 years at  
52  
53  
54  
55  
56  
57  
58  
59  
60



1 first hospitalisation) however their rate was still higher than that of the general population (IR 0.11,  
2 median age of 5.37 years at first hospitalisation). The highest rates of hospitalisation over time were  
3 experienced by those with severe ID and those with ID with a known biomedical cause with both  
4 groups experiencing five or more hospitalisations by five years of age (Figure 1). The similarity of  
5 curves between those with mild/moderate ID and ASD with ID can also be seen. All case groups  
6 experienced a higher estimated risk of hospitalisations than the unaffected individuals (Table 2).  
7  
8  
9  
10  
11  
12  
13  
14

15  
16  
17 Figure 2 shows the time to hospitalisation curves by case status for the four birth cohorts. The  
18 curves for the severe ID and the biomedically caused ID groups separate increasingly with  
19 advancing age and shows that the difference between these two groups has amplified over time.  
20  
21 Table 3 shows the differences in rate estimates for the different birth year bands over the different  
22 case status groups, compared with all other groups. This shows that there is an increase in  
23 difference in hospitalisation rate over time in the severe ID (no ASD) groups and the biomedical ID  
24 groups much greater than the rate differences of the other groups, and that the severe ID group's  
25 risk increases more steeply than that of the biomedical ID group. To measure this more precisely,  
26 interaction effects between case status and birth year were included in the Cox proportional hazards  
27 modelling and demonstrated that a significantly greater proportion of the variability in time to  
28 hospitalisation was explained by the interaction model than by the main effects model ( $p < 0.001$ ).  
29  
30  
31  
32  
33  
34  
35  
36  
37  
38  
39  
40  
41  
42  
43

44 Figure 3 shows the hazard ratios over birth year from this interaction model in all six groups. These  
45 hazard ratios and their confidence intervals are also shown in Table 4. The great increase in risk for  
46 all groups compared with the general population is clear, as is the change in hospitalisation relative  
47 risk over time both within each group and differing patterns between the groups. In all groups, an  
48 increase in risk of hospitalisation was associated with a more recent birth year, however, a small but  
49 steadily upwards trend was only observed in the general population and the mild/moderate ID  
50  
51  
52  
53  
54  
55  
56  
57  
58  
59  
60

1 groups. Risk of hospitalisation per birth year fluctuated for those with ASDs (with or without an  
2 ID) and for those with severe ID (though from a higher rate).  
3  
4  
5  
6  
7

8 There were 30,850 births before 37 weeks gestation (7.42% of all births in the cohort) who survived  
9 the first year of life. Univariate comparison of time to hospitalisation for those born pre-term vs.  
10 full term suggests that those born pre-term are admitted to hospital more frequently (IR 0.17 per  
11 person-year for pre-term, 0.11 for full term), and earlier (median time to hospitalisation 3.01 years  
12 for pre-term, 5.37 years for full-term) than those born full term. Including birth year and case status  
13 factors in the Cox proportional hazards model showed that the hazard ratio for pre-term birth was  
14 1.45 (95% CI 1.39 – 1.51,  $p < 0.001$ ), indicating the independent effect of pre-term birth on  
15 hospitalisations for each case group (Figure 4).  
16  
17  
18  
19  
20  
21  
22  
23  
24

## 25 **Discussion**

26  
27  
28  
29  
30 This study quantified the rate of hospitalisations for children with an ID and/or ASD compared with  
31 the general population. Children diagnosed with ID and/or ASD experienced more hospitalisations  
32 than children with neither condition, and this effect persisted after taking into account birth year and  
33 pre-term birth status. Whilst overall hospitalisation rates differ by age, the rate of hospitalisation  
34 appears to decline with increasing age, particularly for the groups with a known biomedical cause  
35 and with severe ID of unknown cause, in contrast to the general population where the rate appears  
36 more constant. We also showed that the independent effect of pre-term birth on hospitalisation rates  
37 after one year of age is both an increase in frequency and earlier median age at hospitalisation, and  
38 this is consistent across all case groups.  
39  
40  
41  
42  
43  
44  
45  
46  
47  
48  
49

50  
51  
52 Recent studies in the US<sup>17</sup> and Denmark<sup>22</sup> have investigated the hospitalisation burden for children  
53 with autism, and found that individuals with autism had significantly higher lengths of stay and that  
54 costs were considerably more than for those without autism. The Danish study also found that  
55  
56  
57  
58  
59  
60

1 children with ASD had an increased rate of contact with hospital, regardless of the cause of their  
2 hospital admission. However, unlike our study neither of these two studies were able to compare the  
3 hospitalisation patterns of children with ASD with those of children with ID. What we found was  
4 that the highest rate of hospitalisations occurred among the severe ID group, followed by those with  
5 a known biomedical cause for their ID, mild/moderate ID, ASD with ID, ASD without ID and then  
6 the comparison population. Thus the rate of hospitalisation was positively correlated with the  
7 severity of ID. Our study was able to demonstrate the gradient of risk between the groups over the  
8 study period using the same data methods, whole-of-population sampling and controlling for  
9 interaction variables. We have also shown an increasing discrepancy in hospitalisations over time  
10 between those with severe ID and no ASD and those with a biomedical cause, particularly at  
11 younger ages. One possible explanation is that in more recent years the aetiology of severe  
12 intellectual disability is being increasingly identified through new genetic techniques<sup>25, 26</sup> and thus  
13 there has been a diagnostic transfer from those with severe ID of unknown cause to those with a  
14 biomedical cause over time. Another explanation may be the improved survival in those with severe  
15 ID of unknown cause which is associated with ongoing high medical needs.

16  
17  
18  
19  
20  
21  
22  
23  
24  
25  
26  
27  
28  
29  
30  
31  
32  
33  
34  
35  
36  
37 Various comorbid health conditions affect children with ID, including epilepsy, skin conditions,  
38 sensory loss, fractures and psychiatric disorders.<sup>2-4</sup> However apart from individual conditions such  
39 as Down syndrome,<sup>6</sup> Rett syndrome,<sup>27</sup> Tuberous Sclerosis<sup>28</sup> and Angelman syndrome<sup>29</sup> and a  
40 recent paper describing the increase over time in resource utilisation by children with neurological  
41 impairment,<sup>30</sup> there is a dearth of population-based data on medical co-morbidities associated with  
42 ID. Our results would suggest that, although ID may be under-recognised and under-researched in  
43 comparison to autism, its associated health burden should not be underestimated. In Canada it has  
44 been shown that for ambulatory care sensitive (ACS) conditions, people with an ID are hospitalised  
45 at six times the rate of those without an ID, with the rate ratio peaking at double this for those aged  
46 30-39 years.<sup>31</sup> This may reflect a lack of appropriate and accessible primary care for people with  
47  
48  
49  
50  
51  
52  
53  
54  
55  
56  
57  
58  
59  
60

1 ID, particularly for those transitioning from the paediatric health care system. The highest  
2 hospitalisation rate ratio was for epilepsy, known to be a common co-morbid condition for people  
3 with ID<sup>3</sup>, and a condition with a high level of impact on the life of the individual and their family.<sup>32</sup>  
4  
5  
6  
7  
8  
9

10 As with ID, various comorbid health conditions including gastrointestinal disorders, sleep  
11 disturbances, sensory impairments, diabetes mellitus type 1 and epilepsy also occur in ASD.<sup>9, 16, 33,</sup>  
12

13 <sup>34</sup> Although the hospitalisation burden for children with ASD<sup>17, 35</sup> has previously been reported to  
14 be high we have clearly shown in our present study that for children with ID the burden is  
15 considerably greater. Behaviour and communication difficulties are reported to be significant  
16 barriers to utilising hospital care for children with developmental disabilities<sup>19, 36</sup> and may increase  
17 the overall burden and amount of family support necessary.<sup>37, 38</sup> Such challenging behaviours are  
18 known to be more frequent in children with ASD than in those with ID and thus may increase the  
19 difficulty in their accessing hospital care. Comorbid psychopathology is particularly common in  
20 children with ASD<sup>39</sup> and the specific types of behaviours associated with ASD may discourage  
21 hospitalisation and also shorten the length of stay.<sup>40</sup> More detailed research on the patterns of  
22 primary and secondary health care use for people with an ID and/or ASD, according to health  
23 burden and sociodemographic status is needed to unpack the associations between these disorders  
24 and increased hospitalisation. Because of the increased risk of hospitalisations of children with ID  
25 and ASD resource planners need to prioritise specialised care allocation for these populations. Lack  
26 of medical and nursing staff trained in developmental disability management skills may have in the  
27 past led to negative experiences, inadequate care and compounded problems.<sup>41, 42</sup> Qualitative  
28 information from parents would help to understand these relationships and identify specific factors  
29 that may affect or modify the risk of hospitalisation in these children. Such research would be  
30 important in helping to inform resource planning. We concur with the plea made by Berry and  
31 colleagues to ensure that the current health care system is adequately educated and equipped to care  
32 for this growing proportion of vulnerable children within the hospital population.<sup>30</sup>  
33  
34  
35  
36  
37  
38  
39  
40  
41  
42  
43  
44  
45  
46  
47  
48  
49  
50  
51  
52  
53  
54  
55  
56  
57  
58  
59  
60

1  
2  
3  
4 A strength of our study has been the ability to use population-based data on children's  
5  
6 hospitalisations and link these to sources of disability diagnosis (i.e. presence of ID or ASD). By  
7  
8 including birth year in the model we were able to account for these changes over time and show  
9  
10 how the patterns of risk of hospitalisation changed for individuals in the different categories. We  
11  
12 also accounted for possible confounding by pre-term birth status, known to be associated with  
13  
14 increased childhood hospitalisations<sup>43</sup> and demonstrated the consistent effect of pre-term birth on  
15  
16 hospitalisation rates across all case groups and the rest of the population. Weaknesses in our study  
17  
18 included exclusion from our modelling of hospitalisation history in the first year of life, which may  
19  
20 indeed change later risk of hospitalisation. This was lack of access to birth date data (for privacy  
21  
22 reasons) and to a change in coding practises in the WA healthcare system that occurred in the mid-  
23  
24 1990s.  
25  
26  
27  
28  
29

30 Children with developmental disabilities have an increased risk of hospitalisation, the extent of  
31  
32 which varies according to the type of disability and level of intellectual functioning. Future research  
33  
34 should investigate how hospitalisations relate to underlying morbidities, common in intellectual  
35  
36 disability and less so in autism, and also consider the role of access to primary care in preventing  
37  
38 unnecessary hospitalisation. A better understanding of the patterns of hospitalisation for these  
39  
40 children will help establish resource planning opportunities for the specific services required to  
41  
42 meet their increasing needs.<sup>44</sup>  
43  
44  
45  
46  
47

#### 48 Acknowledgements

49  
50 The authors are grateful to the Disability Services Commission, the Telethon Institute for Child  
51  
52 Health Research, the Western Australia Department of Education, the Catholic Education Office  
53  
54 and the Association of Independent Schools of Western Australia, for assistance with data  
55  
56 collection for the IDEA database. We thank Dr Geoff Hammond for his statistical advice on aspects  
57  
58 of the paper.  
59  
60

1  
2 Funding Source: This study was supported by Program Grant #303189 from the Australian National  
3 Health and Medical Research Council (NHMRC) and NHMRC Senior Research Fellowship  
4 #572742 (Dr Helen Leonard).  
5  
6  
7

8 Financial Disclosure Statement: Nothing to disclose  
9

10  
11 Conflict of Interest: The authors have no conflicts of interest.  
12  
13

## 14 15 16 17 18 19 20 21 22 23 24 25 26 27 28 29 30 31 32 33 34 35 36 37 38 39 40 41 42 43 44 45 46 47 48 49 50 51 52 53 54 55 56 57 58 59 60

1. Leonard H, Petterson B, Bower C, et al. Prevalence of intellectual disability in Western Australia. *Paediatr Perinat Epidemiol.* 2003;17:58-67.
2. Jansen DE, Krol B, Groothoff JW, et al. People with intellectual disability and their health problems: a review of comparative studies. *J Intell Disabil Res.* 2004;48(Pt 2):93-102. Epub 2004/01/16.
3. Oeseburg B, Dijkstra GJ, Groothoff JW, et al. Prevalence of chronic health conditions in children with intellectual disability: a systematic literature review. *Intellect Dev Disabil.* 2011;49(2):59-85.
4. van Schrojenstein Lantman-de Valk HMJ. Health in People with Intellectual Disabilities: Current Knowledge and Gaps in Knowledge. *J Appl Res Intellect Disabil.* 2005;18(4):325-33.
5. Leonard H, Wen X. The epidemiology of mental retardation: challenges and opportunities in the new millennium. *Ment Retard Dev D R.* 2002;8(3):117-34.
6. Thomas K, Girdler S, Bourke J, et al. Overview of Health Issues in School-aged Children with Down Syndrome. In: Urbano R, C., editor. *Int Rev Res Ment Ret: Academic Press*; 2010. p. p. 67-106.
7. Cassidy SB, Schwartz S, Miller JL, et al. *Genet Med.* 2012;14(1):10-26. Epub 2012/01/13.
8. Williams K, Leonard H, Tursan d'Espaignet E, et al. Hospitalisations from birth to 5 years in a population cohort of Western Australian children with intellectual disability. *Arch Dis Child.* 2005;90(12):1243-8.
9. Schieve LA, Gonzalez V, Boulet SL, et al. Concurrent medical conditions and health care use and needs among children with learning and behavioral developmental disabilities, National Health Interview Survey, 2006-2010. *Res Dev Disabil.* 2012;33(2):467-76. Epub 2011/11/29.
10. Einfeld SL, Tonge BJ. Population prevalence of psychopathology in children and adolescents with intellectual disability: II. Epidemiological findings. *J Intell Disabil Res.* 1996;40(Pt 2):99-109.
11. Balogh RS, Hunter D, Ouellette-Kuntz H. Hospital Utilization among Persons with an Intellectual Disability, Ontario, Canada, 1995–2001. *J Appl Res Intellect Disabil.* 2005;18(2):181-90.
12. American Psychiatric Association. *Diagnostic and Statistical Manual of Mental Health Disorders 4th Edition.* Washington DC: American Psychiatric Association; 1994.
13. Leonard H, Dixon G, Whitehouse A, et al. Unpacking the complex nature of the autism epidemic. *Res Autism Spect Dis.* 2010;4(4):548-54.

14. Baio J. Prevalence of autism spectrum disorders-Autism and Developmental Disabilities Monitoring Network, 14 Sites, United States 2008. *MMWR CDC Surveill Summ.* 2012;61(3):1-19.
15. Leonard H, Glasson E, Nassar N, et al. Autism and intellectual disability are differentially related to sociodemographic background at birth. *PLoS One.* 2011;6(3):e17875. Epub 2011/04/12.
16. Kohane IS, McMurry A, Weber G, et al. The co-morbidity burden of children and young adults with autism spectrum disorders. *PLoS One.* 2012;7(4):e33224. Epub 2012/04/19.
17. Lokhandwala T, Khanna R, West-Strum D. Hospitalization burden among individuals with autism. *J Autism Dev Disord.* 2012;42(1):95-104. Epub 2011/03/16.
18. Thomas K, Bourke J, Girdler S, et al. Variation over time in medical conditions and health service utilization of children with Down syndrome. *J Pediatr.* 2011;158(2):194-200 e1.
19. Lunskey Y, Lin E, Balogh R, et al. Are adults with developmental disabilities more likely to visit EDs? *Am J Emerg Med.* 2011;29(4):463-5.
20. Lunskey Y, Balogh R, Khodaverdian A, et al. A Comparison of Medical and Psychobehavioral Emergency Department Visits Made by Adults with Intellectual Disabilities. *Emerg Med Int.* 2012;2012:6.
21. Petterson B, Leonard H, Bourke J, et al. IDEA (Intellectual Disability Exploring Answers): a population-based database for intellectual disability in Western Australia. *Ann Hum Biol.* 2005;32(2):237-43.
22. Leonard H, Petterson B, De Klerk N, et al. Association of sociodemographic characteristics of children with intellectual disability in Western Australia. *Soc Sci Med.* 2005;60(7):1499-513.
23. Yeargin-Allsopp M, Murphy CC, Cordero JF, et al. Reported biomedical causes and associated medical conditions for mental retardation among 10-year-old children, metropolitan Atlanta, 1985 to 1987. *Dev Med Child Neurol.* 1997;39(3):142-9. Epub 1997/03/01.
24. Holman CD, Bass AJ, Rosman DL, et al. A decade of data linkage in Western Australia: strategic design, applications and benefits of the WA data linkage system. *Aust Health Rev.* 2008;32(4):766-77. Epub 2008/11/05.
25. Jaillard S, Drunat Sv, Bendavid C, et al. Identification of gene copy number variations in patients with mental retardation using array-CGH: Novel syndromes in a large French series. *Eur J Med Genet.* 2010;53(2):66-75.
26. Koolen DA, Pfundt R, de Leeuw N, et al. Genomic microarrays in mental retardation: A practical workflow for diagnostic applications. *Hum Mutat.* 2009;30(3):283-92.
27. Young D, Bebbington A, de Klerk N, et al. The relationship between MECP2 mutation type and health status and service use trajectories over time in a Rett syndrome population. *Res Autism Spect Dis.* 2011;5(1):442-9.
28. Osborne JP, Merrifield J, O'Callaghan FJ. Tuberous sclerosis--what's new? *Arch Dis Child.* 2008;93(9):728-31. Epub 2008/05/06.
29. Williams CA, Driscoll DJ, Dagli AI. Clinical and genetic aspects of Angelman syndrome. *Genet Med.* 2010;12(7):385-95. Epub 2010/05/07.
30. Berry JG, Poduri A, Bonkowsky JL, et al. Trends in resource utilization by children with neurological impairment in the United States inpatient health care system: a repeat cross-sectional study. *PLoS Med.* 2012;9(1):e1001158. Epub 2012/01/25.
31. Balogh R, Brownell M, Ouellette-Kuntz H, et al. Hospitalisation rates for ambulatory care sensitive conditions for persons with and without an intellectual disability--a population perspective. *J Intell Disabil Res.* 2010;54(9):820-32. Epub 2010/08/14.

- 1 32. Bowley C, Kerr M. Epilepsy and intellectual disability. *J Intell Disabil Res.* 2000;44 (2  
2 Pt 5):529-43. Epub 2000/11/18.
- 3 33. Lauritsen MB, Mors O, Mortensen PB, et al. Medical disorders among inpatients  
4 with autism in Denmark according to ICD-8: a nationwide register-based study. *J Autism*  
5 *Dev Disord.* 2002;32(2):115-9.
- 6 34. Bolton PF. Medical conditions in autism spectrum disorders. *J Neurodev Disord.*  
7 2009;1(2):102-13. Epub 2009/06/01.
- 8 35. Atladottir HO, Schendel D, Lauritsen M, et al. Patterns of Contact with Hospital for  
9 Children with an Autism Spectrum Disorder: A Danish Register-Based Study. *J Autism*  
10 *Dev Disord.* 2012;42(8):1717-28.
- 11 36. van Schrojenstein Lantman-de Valk HMJ, van den Akker M, Maaskant MA, et al.  
12 Prevalence and incidence of health problems in people with intellectual disability. *J Intell*  
13 *Disabil Res.* 1997;41(1):42-51.
- 14 37. Hemsley B, Balandin S, Togher L. Narrative analysis of the hospital experience for  
15 older parents of people who cannot speak. *J Aging Stud.* 2007;21(3):239-54.
- 16 38. Iacono T, Davis R. The experiences of people with developmental disability in  
17 Emergency Departments and hospital wards. *Res Dev Disabil.* 2003;24(4):247-64.
- 18 39. Brereton AV, Tonge BJ, Einfeld SL. Psychopathology in children and adolescents  
19 with autism compared to young people with intellectual disability. *J Autism Dev Disord.*  
20 2006;36(7):863-70. Epub 2006/08/10.
- 21 40. Scarpinato N, Bradley J, Kurbjun K, et al. Caring for the child with an autism  
22 spectrum disorder in the acute care setting. *J Spec Pediatr Nurs.* 2010;15(3):244-54. Epub  
23 2010/07/14.
- 24 41. Lennox N, Diggins J. Knowledge, skills and attitudes: Medical schools' coverage of  
25 an ideal curriculum on intellectual disability. *J Intellect Dev Dis.* 1999;24(4):341.
- 26 42. Ouellette-Kuntz H. Understanding Health Disparities and Inequities Faced by  
27 Individuals with Intellectual Disabilities. *J Appl Res Intellect Disabil.* 2005;18(2):113-21.
- 28 43. Petrou S, Mehta Z, Hockley C, et al. The impact of preterm birth on hospital  
29 inpatient admissions and costs during the first 5 years of life. *Pediatrics.* 2003;112(6 Pt  
30 1):1290-7.
- 31 44. Brownell MD, Derksen SA, Jutte DP, et al. Socio-economic inequities in children's  
32 injury rates: has the gradient changed over time? *Can J Public Health.* 2010;101 Suppl  
33 3:S28-31. Epub 2011/03/22.
- 34
- 35
- 36
- 37
- 38
- 39
- 40
- 41
- 42
- 43
- 44
- 45
- 46
- 47
- 48
- 49
- 50
- 51
- 52
- 53
- 54
- 55
- 56
- 57
- 58
- 59
- 60



**Table 1 – Distribution of individuals in different case groups**

| Case-comparison group status | Frequency | Percent | Cumulative |
|------------------------------|-----------|---------|------------|
| No ASD No ID                 | 409,454   | 98.28   | 98.28      |
| Mild/mod ID No ASD           | 4,667     | 1.12    | 99.4       |
| Severe ID No ASD             | 293       | 0.07    | 99.47      |
| ASD & ID                     | 767       | 0.18    | 99.66      |
| ASD No ID                    | 475       | 0.11    | 99.77      |
| Biomedical ID                | 955       | 0.23    | 100        |
| Total                        | 416,611   | 100     |            |

**Table 2 - Cox Proportional Hazard Ratios for Hospitalisation by Case Group**

| Case group         | Hazard Ratio | Robust Standard Error | p-value* | 95% Confidence Interval |      |
|--------------------|--------------|-----------------------|----------|-------------------------|------|
| No ASD No ID       | 1.0          | -                     |          |                         |      |
| Mild/mod ID No ASD | 3.1          | 0.16                  | <0.001   | 2.8                     | 3.4  |
| Severe ID No ASD   | 10.3         | 0.93                  | <0.001   | 8.7                     | 12.3 |
| ASD & ID           | 2.8          | 0.31                  | <0.001   | 2.3                     | 3.5  |
| ASD No ID          | 2.1          | 0.13                  | <0.001   | 1.8                     | 2.4  |
| Biomedical ID      | 7.4          | 0.34                  | <0.001   | 6.7                     | 8.1  |

\*Wald test

**Table 3 – Rate Estimate comparison (using margins, dydx) for birth year band trend over the different case-status groups.**

| Birth Year Band | Case-Status      | Rate Estimate difference                    | 95% Confidence Interval |        | P-value |
|-----------------|------------------|---------------------------------------------|-------------------------|--------|---------|
| 1983 - 1986     | Affected         | Baseline for Affected status Rate Estimate  |                         |        |         |
|                 | No ASD No ID     | Baseline for No ASD No ID Rate Estimate     |                         |        |         |
| 1986 - 1990     | Affected         | 0.573                                       | 0.445                   | 0.701  | <0.001  |
|                 | No ASD No ID     | -0.046                                      | -0.053                  | -0.039 | <0.001  |
| 1990 - 1994     | Affected         | 0.056                                       | 0.010                   | 0.102  | 0.017   |
|                 | No ASD No ID     | -0.266                                      | -0.811                  | 0.278  | 0.338   |
| 1994 - 1999     | Affected         | 0.075                                       | 0.028                   | 0.122  | 0.002   |
|                 | No ASD No ID     | 0.263                                       | -0.388                  | 0.913  | 0.429   |
| 1983 - 1986     | All other Groups | Baseline for All other groups Rate Estimate |                         |        |         |
|                 | Mild ID no ASD   | Baseline for Mild ID No ASD Rate Estimate   |                         |        |         |
| 1986 - 1990     | All other Groups | -0.014                                      | -0.023                  | -0.005 | 0.001   |
|                 | Mild ID no ASD   | -0.210                                      | -0.328                  | -0.091 | 0.001   |
| 1990 - 1994     | All other Groups | 0.042                                       | 0.032                   | 0.052  | <0.001  |
|                 | Mild ID no ASD   | -0.332                                      | -0.452                  | -0.212 | <0.001  |
| 1994 - 1999     | All other Groups | 0.081                                       | 0.070                   | 0.091  | <0.001  |
|                 | Mild ID no ASD   | 0.084                                       | -0.056                  | 0.224  | 0.239   |
| 1983 - 1986     | All other Groups | Baseline for All other groups Rate Estimate |                         |        |         |
|                 | Severe ID no ASD | Baseline for Severe ID no ASD Rate Estimate |                         |        |         |
| 1986 - 1990     | All other Groups | -0.035                                      | -0.043                  | -0.026 | <0.001  |
|                 | Severe ID no ASD | 3.570                                       | 2.905                   | 4.236  | <0.001  |
| 1990 - 1994     | All other Groups | -0.001                                      | -0.010                  | 0.009  | 0.841   |
|                 | Severe ID no ASD | 7.901                                       | 7.042                   | 8.760  | <0.001  |
| 1994 - 1999     | All other Groups | 0.040                                       | 0.030                   | 0.050  | <0.001  |
|                 | Severe ID no ASD | 9.399                                       | 8.312                   | 10.487 | <0.001  |

| Birth Year Band | Case-Status      | Rate Estimate difference                    | 95% Confidence Interval |        | P-value |
|-----------------|------------------|---------------------------------------------|-------------------------|--------|---------|
| 1983 - 1986     | All other Groups | Baseline for All other groups Rate Estimate |                         |        |         |
|                 | ASD & ID         | Baseline for ASD & ID Rate Estimate         |                         |        |         |
| 1986 - 1990     | All other Groups | -0.021                                      | -0.030                  | -0.012 | <0.001  |
|                 | ASD & ID         | 1.488                                       | 1.115                   | 1.862  | <0.001  |
| 1990 - 1994     | All other Groups | 0.046                                       | 0.034                   | 0.057  | <0.001  |
|                 | ASD & ID         | 0.855                                       | 0.467                   | 1.242  | <0.001  |
| 1994 - 1999     | All other Groups | 0.079                                       | 0.068                   | 0.090  | <0.001  |
|                 | ASD & ID         | 0.835                                       | 0.502                   | 1.168  | <0.001  |
| 1983 - 1986     | All other Groups | Baseline for All other groups Rate Estimate |                         |        |         |
|                 | ASD no ID        | Baseline for ASD & no ID Rate Estimate      |                         |        |         |
| 1986 - 1990     | All other Groups | -0.016                                      | -0.025                  | -0.008 | <0.001  |
|                 | ASD no ID        | 0.104                                       | -0.321                  | 0.530  | 0.631   |
| 1990 - 1994     | All other Groups | 0.048                                       | 0.036                   | 0.059  | <0.001  |
|                 | ASD no ID        | 0.493                                       | 0.057                   | 0.929  | 0.027   |
| 1994 - 1999     | All other Groups | 0.082                                       | 0.071                   | 0.093  | <0.001  |
|                 | ASD no ID        | -0.064                                      | -0.463                  | 0.335  | 0.754   |
| 1983 - 1986     | All other Groups | Baseline for All other groups Rate Estimate |                         |        |         |
|                 | Biomedical ID    | Baseline for Biomedical ID Rate Estimate    |                         |        |         |
| 1986 - 1990     | All other Groups | -0.031                                      | -0.039                  | -0.023 | <0.001  |
|                 | Biomedical ID    | 1.439                                       | 1.100                   | 1.777  | <0.001  |
| 1990 - 1994     | All other Groups | -0.005                                      | -0.015                  | 0.005  | 0.340   |
|                 | Biomedical ID    | 5.307                                       | 4.828                   | 5.786  | <0.001  |
| 1994 - 1999     | All other Groups | 0.055                                       | 0.044                   | 0.065  | <0.001  |
|                 | Biomedical ID    | 2.731                                       | 2.322                   | 3.140  | <0.001  |

Table 4

Hazard Ratios, 95% Confidence Intervals and p-values compared to individuals without ASD or ID born in 1993 as shown in Figure 3.

| Case Status    | Birth Year   | Hazard Ratio | 95% Confidence Interval |                  | P-value (compared to baseline) |
|----------------|--------------|--------------|-------------------------|------------------|--------------------------------|
| No ASD or ID   | 1983         |              | baseline                |                  |                                |
|                | 1984         | 0.997        | 0.985                   | 1.009            | 0.587                          |
|                | 1985         | 0.994        | 0.982                   | 1.007            | 0.352                          |
|                | 1986         | 0.974        | 0.962                   | 0.987            | <0.001                         |
|                | 1987         | 0.930        | 0.918                   | 0.943            | <0.001                         |
|                | 1988         | 0.960        | 0.947                   | 0.973            | <0.001                         |
|                | 1989         | 0.934        | 0.921                   | 0.947            | <0.001                         |
|                | 1990         | 0.929        | 0.915                   | 0.942            | <0.001                         |
|                | 1991         | 0.946        | 0.932                   | 0.960            | <0.001                         |
|                | 1992         | 0.960        | 0.946                   | 0.974            | <0.001                         |
|                | 1993         | 0.968        | 0.954                   | 0.982            | <0.001                         |
|                | 1994         | 0.972        | 0.958                   | 0.987            | <0.001                         |
|                | 1995         | 0.975        | 0.960                   | 0.990            | 0.001                          |
|                | 1996         | 0.999        | 0.984                   | 1.015            | 0.943                          |
|                | 1997         | 1.036        | 1.019                   | 1.052            | <0.001                         |
|                | 1998         | 1.041        | 1.024                   | 1.058            | <0.001                         |
| 1999           | 1.031        | 1.014        | 1.049                   | <0.001           |                                |
| Mild ID no ASD | <b>1983</b>  | <b>4.626</b> | <b>4.418</b>            | <b>4.844</b>     | <b>&lt;0.001</b>               |
|                | <b>1984</b>  | <b>2.192</b> | <b>2.061</b>            | <b>2.332</b>     | <b>&lt;0.001</b>               |
|                | <b>1985</b>  | <b>2.852</b> | <b>2.704</b>            | <b>3.009</b>     | <b>&lt;0.001</b>               |
|                | <b>1986</b>  | <b>2.958</b> | <b>2.811</b>            | <b>3.112</b>     | <b>&lt;0.001</b>               |
|                | <b>1987</b>  | <b>2.558</b> | <b>2.436</b>            | <b>2.686</b>     | <b>&lt;0.001</b>               |
|                | <b>1988</b>  | <b>3.328</b> | <b>3.175</b>            | <b>3.488</b>     | <b>&lt;0.001</b>               |
|                | <b>1989</b>  | <b>3.014</b> | <b>2.869</b>            | <b>3.166</b>     | <b>&lt;0.001</b>               |
|                | <b>1990</b>  | <b>3.019</b> | <b>2.875</b>            | <b>3.170</b>     | <b>&lt;0.001</b>               |
|                | <b>1991</b>  | <b>2.539</b> | <b>2.408</b>            | <b>2.678</b>     | <b>&lt;0.001</b>               |
|                | <b>1992</b>  | <b>2.736</b> | <b>2.601</b>            | <b>2.879</b>     | <b>&lt;0.001</b>               |
|                | <b>1993</b>  | <b>3.079</b> | <b>2.904</b>            | <b>3.266</b>     | <b>&lt;0.001</b>               |
|                | <b>1994</b>  | <b>3.017</b> | <b>2.848</b>            | <b>3.197</b>     | <b>&lt;0.001</b>               |
|                | <b>1995</b>  | <b>2.821</b> | <b>2.632</b>            | <b>3.024</b>     | <b>&lt;0.001</b>               |
| <b>1996</b>    | <b>3.662</b> | <b>3.421</b> | <b>3.920</b>            | <b>&lt;0.001</b> |                                |
| <b>1997</b>    | <b>3.254</b> | <b>2.960</b> | <b>3.577</b>            | <b>&lt;0.001</b> |                                |
| <b>1998</b>    | <b>3.896</b> | <b>3.498</b> | <b>4.339</b>            | <b>&lt;0.001</b> |                                |
| <b>1999</b>    | <b>4.001</b> | <b>3.549</b> | <b>4.510</b>            | <b>&lt;0.001</b> |                                |

| Case Status      | Birth Year   | Hazard Ratio | 95% Confidence Interval |                  | P-value (compared to baseline) |
|------------------|--------------|--------------|-------------------------|------------------|--------------------------------|
| Severe ID no ASD | 1983         | 6.813        | 6.046                   | 7.676            | <0.001                         |
|                  | 1984         | 5.783        | 5.052                   | 6.620            | <0.001                         |
|                  | 1985         | 4.619        | 4.014                   | 5.314            | <0.001                         |
|                  | 1986         | 8.095        | 7.252                   | 9.038            | <0.001                         |
|                  | 1987         | 10.362       | 9.257                   | 11.599           | <0.001                         |
|                  | 1988         | 11.129       | 10.030                  | 12.348           | <0.001                         |
|                  | 1989         | 8.089        | 7.245                   | 9.033            | <0.001                         |
|                  | 1990         | 11.263       | 10.049                  | 12.625           | <0.001                         |
|                  | 1991         | 20.315       | 18.789                  | 21.965           | <0.001                         |
|                  | 1992         | 8.552        | 7.491                   | 9.763            | <0.001                         |
|                  | 1993         | 11.824       | 10.050                  | 13.909           | <0.001                         |
|                  | 1994         | 12.425       | 10.556                  | 14.626           | <0.001                         |
|                  | 1995         | 17.095       | 14.755                  | 19.806           | <0.001                         |
|                  | 1996         | 9.998        | 8.007                   | 12.485           | <0.001                         |
|                  | 1997         | 20.663       | 17.483                  | 24.422           | <0.001                         |
|                  | 1998         | 20.499       | 18.260                  | 23.013           | <0.001                         |
|                  | 1999         | 7.245        | 5.612                   | 9.353            | <0.001                         |
| ASD & ID         | <b>1983</b>  | <b>1.352</b> | <b>0.945</b>            | <b>1.934</b>     | <b>0.099</b>                   |
|                  | <b>1984</b>  | <b>1.743</b> | <b>1.313</b>            | <b>2.313</b>     | <b>&lt;0.001</b>               |
|                  | <b>1985</b>  | <b>2.206</b> | <b>1.745</b>            | <b>2.789</b>     | <b>&lt;0.001</b>               |
|                  | <b>1986</b>  | <b>2.081</b> | <b>1.664</b>            | <b>2.602</b>     | <b>&lt;0.001</b>               |
|                  | <b>1987</b>  | <b>5.996</b> | <b>5.353</b>            | <b>6.715</b>     | <b>&lt;0.001</b>               |
|                  | <b>1988</b>  | <b>2.246</b> | <b>1.838</b>            | <b>2.744</b>     | <b>&lt;0.001</b>               |
|                  | <b>1989</b>  | <b>3.081</b> | <b>2.665</b>            | <b>3.563</b>     | <b>&lt;0.001</b>               |
|                  | <b>1990</b>  | <b>2.642</b> | <b>2.227</b>            | <b>3.134</b>     | <b>&lt;0.001</b>               |
|                  | <b>1991</b>  | <b>4.074</b> | <b>3.579</b>            | <b>4.638</b>     | <b>&lt;0.001</b>               |
|                  | <b>1992</b>  | <b>2.039</b> | <b>1.696</b>            | <b>2.450</b>     | <b>&lt;0.001</b>               |
|                  | <b>1993</b>  | <b>1.762</b> | <b>1.428</b>            | <b>2.175</b>     | <b>&lt;0.001</b>               |
|                  | <b>1994</b>  | <b>3.448</b> | <b>3.021</b>            | <b>3.936</b>     | <b>&lt;0.001</b>               |
| <b>1995</b>      | <b>1.821</b> | <b>1.516</b> | <b>2.186</b>            | <b>&lt;0.001</b> |                                |
| <b>1996</b>      | <b>4.367</b> | <b>3.872</b> | <b>4.925</b>            | <b>&lt;0.001</b> |                                |
| <b>1997</b>      | <b>2.225</b> | <b>1.927</b> | <b>2.568</b>            | <b>&lt;0.001</b> |                                |
| <b>1998</b>      | <b>2.102</b> | <b>1.800</b> | <b>2.454</b>            | <b>&lt;0.001</b> |                                |
| <b>1999</b>      | <b>2.264</b> | <b>1.936</b> | <b>2.647</b>            | <b>&lt;0.001</b> |                                |

| Case Status   | Birth Year    | Hazard Ratio  | 95% Confidence Interval |                  | P-value (compared to baseline) |
|---------------|---------------|---------------|-------------------------|------------------|--------------------------------|
| ASD no ID     | 1983          | 2.048         | 1.508                   | 2.782            | <0.001                         |
|               | 1984          | 2.321         | 1.773                   | 3.038            | <0.001                         |
|               | 1985          | 1.095         | 0.671                   | 1.787            | 0.718                          |
|               | 1986          | 3.387         | 2.661                   | 4.312            | <0.001                         |
|               | 1987          | 1.720         | 1.338                   | 2.211            | <0.001                         |
|               | 1988          | 1.104         | 0.712                   | 1.712            | 0.657                          |
|               | 1989          | 1.936         | 1.527                   | 2.456            | <0.001                         |
|               | 1990          | 2.088         | 1.690                   | 2.580            | <0.001                         |
|               | 1991          | 2.139         | 1.777                   | 2.575            | <0.001                         |
|               | 1992          | 2.207         | 1.843                   | 2.645            | <0.001                         |
|               | 1993          | 2.928         | 2.471                   | 3.469            | <0.001                         |
|               | 1994          | 1.819         | 1.477                   | 2.239            | <0.001                         |
|               | 1995          | 1.874         | 1.524                   | 2.305            | <0.001                         |
|               | 1996          | 1.691         | 1.384                   | 2.066            | <0.001                         |
|               | 1997          | 1.638         | 1.293                   | 2.074            | <0.001                         |
| 1998          | 2.080         | 1.562         | 2.768                   | <0.001           |                                |
| 1999          | 2.728         | 2.001         | 3.720                   | <0.001           |                                |
| Biomedical ID | <b>1983</b>   | <b>4.812</b>  | <b>4.443</b>            | <b>5.211</b>     | <b>&lt;0.001</b>               |
|               | <b>1984</b>   | <b>5.748</b>  | <b>5.328</b>            | <b>6.200</b>     | <b>&lt;0.001</b>               |
|               | <b>1985</b>   | <b>5.012</b>  | <b>4.615</b>            | <b>5.444</b>     | <b>&lt;0.001</b>               |
|               | <b>1986</b>   | <b>5.480</b>  | <b>5.041</b>            | <b>5.958</b>     | <b>&lt;0.001</b>               |
|               | <b>1987</b>   | <b>6.311</b>  | <b>5.832</b>            | <b>6.829</b>     | <b>&lt;0.001</b>               |
|               | <b>1988</b>   | <b>5.369</b>  | <b>4.900</b>            | <b>5.883</b>     | <b>&lt;0.001</b>               |
|               | <b>1989</b>   | <b>7.738</b>  | <b>7.095</b>            | <b>8.438</b>     | <b>&lt;0.001</b>               |
|               | <b>1990</b>   | <b>8.700</b>  | <b>8.089</b>            | <b>9.358</b>     | <b>&lt;0.001</b>               |
|               | <b>1991</b>   | <b>13.724</b> | <b>12.984</b>           | <b>14.505</b>    | <b>&lt;0.001</b>               |
|               | <b>1992</b>   | <b>7.796</b>  | <b>7.161</b>            | <b>8.488</b>     | <b>&lt;0.001</b>               |
|               | <b>1993</b>   | <b>8.786</b>  | <b>8.127</b>            | <b>9.497</b>     | <b>&lt;0.001</b>               |
|               | <b>1994</b>   | <b>7.086</b>  | <b>6.355</b>            | <b>7.902</b>     | <b>&lt;0.001</b>               |
|               | <b>1995</b>   | <b>8.710</b>  | <b>8.017</b>            | <b>9.463</b>     | <b>&lt;0.001</b>               |
| <b>1996</b>   | <b>7.535</b>  | <b>6.798</b>  | <b>8.353</b>            | <b>&lt;0.001</b> |                                |
| <b>1997</b>   | <b>7.182</b>  | <b>6.403</b>  | <b>8.057</b>            | <b>&lt;0.001</b> |                                |
| <b>1998</b>   | <b>6.102</b>  | <b>5.370</b>  | <b>6.935</b>            | <b>&lt;0.001</b> |                                |
| <b>1999</b>   | <b>10.575</b> | <b>9.584</b>  | <b>11.667</b>           | <b>&lt;0.001</b> |                                |

**FIGURE LEGENDS**

**Figure 1 – Nelson-Aalen Cumulative Hazard for Hospitalisation (number of hospitalisations expected by Age shown on x-axis)**

**Figure 2 – Kaplan-Meier Curves showing proportion of individuals in each case group who have not been hospitalised by age, for each birth cohort**

**Figure 3 – Hazard Ratios from multivariate interaction model by birth year and case group status**

**Figure 4 – Hazard Ratio for hospitalisation risk associated with birth year, pre-term birth and case group status from stratified model**

1  
2  
3  
4  
5 Title: Hospitalisation rates for children with intellectual disability or autism born in Western  
6 Australia 1983 – 1999: a population-based cohort study  
7

8 Ami Bebbington<sup>1</sup>, BSc (Hons)  
9 Emma Glasson<sup>1,2</sup>, PhD  
10 Jenny Bourke<sup>1</sup>, MPH  
11 Nicholas de Klerk<sup>1</sup>, PhD  
12 Helen Leonard,<sup>1</sup> MBChB MPH  
13

14  
15 <sup>1</sup> Telethon Institute for Child Health Research, Centre for Child Health Research, The University of  
16 Western Australia

17 <sup>2</sup> School of Population Health Research, The University of Western Australia  
18  
19

20  
21 Corresponding author: Helen Leonard  
22 Telethon Institute for Child Health Research  
23 PO Box 855,  
24 West Perth 6872  
25 Western Australia  
26 Phone: +61 8 94897790, mobile 0419956946  
27 Fax: +61 8 94897700  
28  
29

30  
31 Key Words: hospitalisation, intellectual disability, autism, utilisation  
32

33 | Word count: ~~2980~~3331  
34  
35  
36  
37  
38  
39  
40  
41  
42  
43  
44  
45  
46  
47  
48  
49  
50  
51  
52  
53  
54  
55  
56  
57  
58  
59  
60



1  
2 Article Summary

3 Focus:

- 4 • Children with an intellectual disability and/or autism often experience co-occurring morbidities.  
5 • The rate of hospital admissions experienced by these children compared with the rest of the population  
6 has not been detailed previously.  
7

8 Key Messages:

- 9 • The risk of hospitalisation for children with intellectual disability or autism is up to ten times  
10 that of those unaffected.  
11 • The risk is greatest for those with severe intellectual disability without the presence of autism.  
12 • Pre-term birth was a risk factor for later hospitalisation independently of year of birth or  
13 presence of intellectual disability or autism.  
14

15 Strengths and Limitations:

- 16 • A strength of our study has been the ability to use population-based data on children's  
17 hospitalisations and link these to sources providing information on the presence of intellectual  
18 disability or autism spectrum disorders.  
19 • One weakness in the study included the exclusion from our modelling of hospitalisation history  
20 in the first year of life.  
21  
22  
23  
24  
25  
26  
27

28 There are no additional data available.  
29  
30  
31  
32  
33  
34  
35

36 Contributor's Statements

37 Ami Bebbington has contributed to the paper through involvement in study design, statistical  
38 analysis and interpretation and manuscript preparation.

39 Emma Glasson has contributed to the paper through involvement in study design, manuscript  
40 editing and revision and final review.

41 Jenny Bourke has contributed to the paper through involvement in study design, manuscript editing  
42 and revision and final approval.

43 Nicholas de Klerk has contributed to the paper through statistical design and interpretation and final  
44 manuscript review.

45 Helen Leonard has contributed to the paper through involvement in study design, statistical  
46 interpretation, manuscript editing, revision and final approval.  
47  
48  
49  
50  
51  
52  
53  
54  
55  
56  
57  
58  
59  
60

**ABSTRACT**

Objectives: To describe the hospitalisation patterns in children with intellectual disability (ID) and/or autism spectrum disorder (ASD) after the first year of life and compare with those unaffected.

Design : Prospective cohort study using data linkage between health, intellectual disability and hospitalisation population-based data sets.

Setting : Western Australia

Participants : 416,611 individuals born between 1983 -1999 involving 1,027,962 hospital admission records. Five case categories were defined (mild/moderate ID, severe ID, biomedically caused ID, ASD with ID and ASD without ID) and compared with the remainder of children and young people

Primary and Secondary Outcome Measures: Time to event analysis was used to compare time to hospitalisation and rate of hospitalisation between the different case-groups by estimating hazard ratios, accounting for birth year and pre-term birth status.

Results: ID and/or ASD were found to be associated with an increased risk of hospitalisation compared with the remainder of the population. The increase in risk was highest in those with severe ID and no ASD (HR=10.33, 95% CI 8.66 – 12.31). For those with ID of known biomedical cause or mild ID of unknown cause, the risk of hospitalisation was lower (HR=7.36, 95% CI 6.73 – 8.07 and HR=3.08, 95% CI 2.78 – 3.40, respectively). Those with ASDs had slightly increased risk (HR=2.82, 95% CI 2.26- 3.50 for those with ID and HR=2.09, 95% CI 1.85 – 2.36 for those without ID).

Conclusions: Children with an ID or ASD experience an increased risk of hospitalisation after the first year of life which varied from two to ten times that of the rest of the population. Findings can inform service planning or resource allocation for these children with special needs.

## Introduction

Intellectual disability (ID) affects 143 per 10,000 children<sup>1</sup> and is associated with a range of co-morbid health conditions.<sup>2-4</sup> It is heterogeneous,<sup>5</sup> and clustering of some medical conditions may be associated with particular disorders such as Down syndrome<sup>6</sup> or Prader-Willi syndrome.<sup>7</sup> Whilst epilepsy and sensory impairments often occur in association with specific syndromes or more severe cognitive impairment, conditions such as fractures or obesity, may develop as secondary to medication use, nutritional deficiency or lack of mobility.<sup>2</sup> Consequently, children with ID may face greater health challenges than typically developing children and use health care systems more frequently.<sup>8,9</sup> Mental health problems are also common in people with ID,<sup>10</sup> ~~and~~ For instance, in a Canadian adolescent and adult population with ID a high proportion of hospitalisations were attributed to the presence of psychiatric conditions.<sup>11</sup>

Autism spectrum disorders (ASD) are neurodevelopmental disorders characterized by difficulties in communication and social interaction and associated with repetitive or unusual behaviours.<sup>12</sup> ASD ~~affects between~~ was reported to affect 30 and 60 per 10,000 children in 2003.<sup>13</sup> However a more recent report from the US Autism and Developmental Disabilities Monitoring (ADDM) Network suggests a higher prevalence of 113 per 10,000.<sup>14</sup> ~~but~~ Moreover nearly two thirds of children with ASDs also have ID.<sup>15</sup> Therefore, it is not surprising that children with ASD also often experience medical conditions such as epilepsy, bowel dysfunction and autoimmune disorders<sup>16</sup> and that their burden of hospitalisation is considered to be high.<sup>17</sup>

Differences in health care policies and pathways of care may impact on hospitalisation rates and service use for children with developmental disorders over time.<sup>8,18</sup> For example, a recent Canadian study using administrative data<sup>19</sup> found that those with intellectual or developmental disabilities were more likely than those without to use emergency department services. Families with children affected by ID and/or ASDs may have particular difficulty in accessing primary and

1 specialist health care services, leading to emergency department presentations and hospitalisation  
2 rates greater than those not affected by these disorders. A further Canadian study<sup>20</sup> found that  
3 admissions to an emergency department for people with ID were more likely to be for a  
4 psychobehavioural rather than a medical reason. However there is little population-based data  
5 describing the pattern of hospitalisation among children with ID or ASD. This study uses data  
6 linkage between health and disability data sets to investigate temporal trends in hospitalisation risk  
7 for children with ID and children with ASD in Western Australia (WA) born 1983-1999. The aim  
8 was to compare hospitalisation rates between children with ID and/or ASD to children without  
9 these diagnoses, taking into account type of ID, birth cohort and preterm birth.  
10  
11  
12  
13  
14  
15  
16  
17  
18  
19  
20  
21  
22  
23  
24  
25

## 26 **Methods**

27  
28 Cases of ID were ascertained from the Intellectual Disability Exploring Answers (IDEA) database,  
29 <sup>21</sup> a population-based register of individuals in WA with intellectual disability with or without an  
30 autism spectrum disorder (ASD). The IDEA database receives information from the Disability  
31 Services Commission (DSC) and from the Department of Education on individuals accessing  
32 services or educational support for an intellectual disability in WA. The inclusion criteria for the  
33 IDEA database are an indication of developmental delay before 18 years of age, a full IQ score  
34 below 70, and significant deficits in adaptive behaviour. Cases are categorised into mild ID (IQ  
35 between 55 and 69), moderate ID (IQ 40-54) and severe ID (IQ <40) but for the purposes of this  
36 study, the mild and moderate ID groups were combined.  
37  
38  
39  
40  
41  
42  
43  
44  
45  
46  
47  
48  
49

50 As detailed previously<sup>15</sup> individuals with a diagnosis of an ASD (which includes autism, Asperger  
51 syndrome or Pervasive Developmental Disorder not otherwise specified) were again identified for  
52 this study from three sources; DSC, the Western Australian Register for Autism Spectrum  
53 Disorders (a prospective data collection system for diagnostic information for cases diagnosed since  
54  
55  
56  
57  
58  
59  
60

1999), and/or from a case group born 1983-1995 and diagnosed by 1999 as identified by a developmental paediatrician through case-note review. Using record linkage to the IDEA database, individuals identified with an ASD were sub-divided into those with or without an additional ID. Those for whom an ID status could not be determined were grouped with those with ID, so that the ASD without ID group contained only those definitively known not to have an ID. Individuals were further classified according to whether there was a known biomedical cause for the ID (such as a congenital or genetic condition e.g. Down syndrome) or otherwise. This categorisation is based on the information in the Intellectual Disability (IDEA) Database<sup>21</sup> where assignment of diagnosis was made by the attending clinician according to an AAMR classification system. In this study we followed a similar protocol to that used in our own<sup>15,22</sup> and previous published research.<sup>23</sup> Biomedical diagnoses include genetic conditions (chromosomal and Mendelian), recognized teratogenic effects such as congenital infections and birth defects, neonatal and postneonatal infections, trauma and other events (e.g. neoplasm). However we excluded diagnostic categories (e.g. preterm birth) that are associated with but are not necessarily a sufficient cause of ID and those where a genetic diagnosis might be suspected but not clinically or genetically confirmed. ~~Individuals were further classified according to whether there was a known biomedical cause for the ID (such as a congenital or genetic conditions e.g. Down syndrome) or otherwise, since, if so there is most probably a greater likelihood of additional comorbidities and need for hospitalisation.~~ Therefore five case categories were defined (mild/moderate ID, severe ID, biomedically caused ID, ASD with ID and ASD without ID) and compared with the remainder of children and young people born in WA between 1983 and 1999 who, at the time of case extraction, were unaffected by ID or ASD.

Information on hospitalisations from 1 January, 1983- 31 December, 2004~~5~~ was obtained from the WA Hospital Morbidity Data System, which is a statutory collection of data relating to all inpatient episodes to public, private and freestanding day hospitals in WA since 1970.<sup>24</sup> It contains ICD-

1 coded diagnosis and procedure information. WA also has a statutory collection of pregnancy, birth  
2 and maternal data, recorded at the time of birth, known as the Midwives Notification System.<sup>24</sup>  
3

4  
5  
6 Linkage of all birth records 1983 to 1999 (~~collected via the Midwives Notification System, a~~  
7 ~~statutory collection of pregnancy, birth and maternal data, recorded at the time of birth,~~<sup>24</sup>) to  
8

9  
10 hospital and death data was undertaken independently at the WA Data Linkage Branch, where these  
11  
12 data sets and others are linked regularly for the purposes of approved research projects,<sup>24</sup> and a  
13 de-identified dataset was provided for this analysis in which all individuals were followed from  
14 birth through to either death or the censoring date of 31 December, 2004. Pre-term birth was  
15  
16 defined as being born at less than 37 weeks gestation with gestational age obtained from the  
17  
18 Midwives Notification System.  
19  
20  
21  
22  
23

24  
25  
26 The analysis was restricted to hospitalisations occurring after the first year of life, thereby excluding  
27  
28 individuals who did not survive to this age. The focus of this paper was on hospitalisations  
29  
30 occurring in childhood and adolescence, an area lacking in quantitative, population-based research,  
31  
32 rather than on the hospitalisations occurring peri-natally or in infancy, where our group has already  
33  
34 quantified the increased burden of hospital care in children with ID (particularly biomedically-  
35  
36 caused ID).<sup>8</sup> Hospitalisations occurring on the same day as another recorded hospitalisation, as  
37  
38 well as those occurring as part of a nested transfer (the patient moves to another hospital during a  
39  
40 stay in hospital) or a transfer sequence (the patient moves between hospitals successively without  
41  
42 return home) were ~~excluded~~ considered as a single event.  
43  
44  
45  
46  
47

48  
49 While we refer to case and comparison groups throughout, this is a cohort study where the different  
50  
51 case groups can be thought of as different 'exposures'. Thus time to event analysis (which allows  
52 for varying individual time at risk) was used to compare time to hospitalisation and rate of  
53  
54 hospitalisation between the groups, accounting for birth year and pre-term birth status.  
55  
56

57  
58 Hospitalisation rates were represented by incidence rates (IR) in terms of number of admissions per  
59  
60

1 person per year. Group status was used as a categorical predictor of time to hospitalisation,  
2  
3 producing Nelson-Aalen cumulative hazard estimates (which in this case represent expected  
4  
5 number of hospitalisations experienced by a particular age). Hazard ratios from the Cox  
6  
7 proportional hazards model were also used to investigate differences in risk of hospitalisation for  
8  
9 the different case groups, with robust standard errors estimated to account for the multiple  
10  
11 hospitalisations per individual. The effect of birth year was considered by stratifying year of birth  
12  
13 into four eras being 1983- 1985, 1986-1989, 1990-1993 and 1994-1999, such that each group has  
14  
15 equal number of records, using STATA's **egen cut** command. In more specific modelling, birth  
16  
17 year was included as an indicator variable for each individual year from 1983 to 1999 rather than  
18  
19 banded. Ethical approval for this study was granted by the UWA Human Research Ethics  
20  
21  
22  
23  
24  
25  
26  
27  
28  
29  
30  
31  
32  
33  
34  
35  
36  
37  
38  
39  
40  
41  
42  
43  
44  
45  
46  
47  
48  
49  
50  
51  
52  
53  
54  
55  
56  
57  
58  
59  
60  
Committee.

## Results

A dataset of 1,027,962 records representing the time at risk of hospitalisation for 416,611 children (Table 1) and young people born in WA from 1983 to 1999 was created. The total time at risk of hospitalisation in the cohort was 5,146,927.5 person years, while 3,818.6 person years were spent in hospital (when not on the risk set for hospitalisation). Individual time at risk varied from 5 years (for those born in 1999) to 21 years (for those born in 1983). The dataset contained 611,816 admissions to hospital with a median of one hospitalisation per subject, giving an incidence rate (IR) of 0.12 admissions per person per year and median time to hospitalisation of 5.09 years (inter-quartile-range (IQR) 2.26 years – 13.65 years). By the age of ten years, 67.7% (95% CI 67.6% - 67.8%) of individuals had been hospitalised at least once, increasing to 85.0% (95% CI 84.9% - 85.1%) by the age of 18 years. On average, a child of 10 years in this cohort had been hospitalised 1.13 times (cumulative hazard) and a young person of 18 years, 1.90 times.

1 The highest rate of hospitalisation was observed for cases with severe ID but without an ASD (1.16  
2 hospitalisations/person-year, median time to hospitalisation 1.27 years) followed by cases with a  
3 biomedical cause of ID (0.84 hospitalisations/person year, median age of 1.37 years at first  
4 hospitalisation), mild or moderate ID without ASD (IR 0.34, median age 1.95 years), and ASDs  
5 with ID (IR 0.33, median age of 2.43 years at first hospitalisation). Those children with ASD and no  
6 ID had the lowest rate of hospitalisation of the case groups (IR 0.24, median age of 2.89 years at  
7 first hospitalisation) however their rate was still higher than that of the general population (IR 0.11,  
8 median age of 5.37 years at first hospitalisation). The highest rates of hospitalisation over time were  
9 experienced by those with severe ID and those with ID with a known biomedical cause with both  
10 groups experiencing five or more hospitalisations by five years of age (Figure 1). The similarity of  
11 curves between those with mild/moderate ID and ASD with ID can also be seen. All case groups  
12 experienced a higher estimated risk of hospitalisations than the unaffected individuals (Table 2).

13  
14  
15  
16  
17  
18  
19  
20  
21  
22  
23  
24  
25  
26  
27  
28  
29  
30  
31 Figure 2 shows the time to hospitalisation curves by case status for the four birth cohorts. The  
32 curves for the severe ID and the biomedically caused ID groups separate increasingly with  
33 advancing age and shows that the difference between these two groups has amplified over time.

34  
35  
36  
37 Table 3 shows the differences in rate estimates for the different birth year bands over the different  
38 case status groups, compared with all other groups. This shows that there is an increase in  
39 difference in hospitalisation rate over time in the severe ID (no ASD) groups and the biomedical ID  
40 groups much greater than the rate differences of the other groups, and that the severe ID group's  
41 risk increases more steeply than that of the biomedical ID group. To measure this more precisely,

42  
43  
44  
45  
46  
47  
48 interaction effects between case status and birth year were included in the Cox proportional hazards  
49 modelling and demonstrated that a significantly greater proportion of the variability in time to  
50 hospitalisation was explained by the interaction model than by the main effects model ( $p < 0.001$ ).



1  
2  
3  
4  
5  
6  
7  
8  
9  
10  
11  
12  
13  
14  
15  
16  
17  
18  
19  
20  
21  
22  
23  
24  
25  
26  
27  
28  
29  
30  
31  
32  
33  
34  
35  
36  
37  
38  
39  
40  
41  
42  
43  
44  
45  
46  
47  
48  
49  
50  
51  
52  
53  
54  
55  
56  
57  
58  
59  
60

Figure 3 shows the hazard ratios over birth year from this interaction model in all six groups. [These hazard ratios and their confidence intervals are also shown in Table 4.](#) The great increase in risk for all groups compared with the general population is clear, as is the change in hospitalisation relative risk over time both within each group and differing patterns between the groups. In all groups, an increase in risk of hospitalisation was associated with a more recent birth year, however, a small but steadily upwards trend was only observed in the general population and the mild/moderate ID groups. Risk of hospitalisation per birth year fluctuated for those with ASDs (with or without an ID) and for those with severe ID (though from a higher rate).

There were 30,850 births before 37 weeks gestation (7.42% of all births in the cohort) who survived the first year of life. Univariate comparison of time to hospitalisation for those born pre-term vs. full term suggests that those born pre-term are admitted to hospital more frequently (IR 0.17 per person-year for pre-term, 0.11 for full term), and earlier (median time to hospitalisation 3.01 years for pre-term, 5.37 years for full-term) than those born full term. Including birth year and case status factors in the Cox proportional hazards model showed that the hazard ratio for pre-term birth was 1.45 (95% CI 1.39 – 1.51,  $p < 0.001$ ), indicating ~~that indeed, the independent effect of pre-term birth was a risk factor for later hospitalisation independently of ID/ASD group or birth year on hospitalisations for each case group (Figure 4). Including pre-term birth in the model with case group and birth year interaction resulted in the hazard ratio curves shown in Figure 4 where the pre-term and at term lines are separated by a fixed distance which is the independent effect of pre-term birth. The birth year and case status differences persist after including this pre-term birth effect.~~

## Discussion

This study quantified the rate of hospitalisations for children with an ID and/or ASD compared with the general population. Children diagnosed with ID and/or ASD experienced more hospitalisations

1 than children with neither condition, and this effect persisted after taking into account birth year and  
2 pre-term birth status. Whilst overall hospitalisation rates differ by age, the rate of hospitalisation  
3 appears to decline with increasing age, particularly for the groups with a known biomedical cause  
4 and with severe ID of unknown cause, in contrast to the general population where the rate appears  
5 more constant. We also showed that the independent effect of pre-term birth on hospitalisation rates  
6 after one year of age is both an increase in frequency and earlier median age at hospitalisation, and  
7 this is consistent across all case groups.  
8  
9  
10  
11  
12  
13  
14  
15  
16  
17  
18  
19

20 ~~The highest rate of hospitalisations occurred among the severe ID group, followed by those with a~~  
21 ~~known biomedical cause for their ID, mild/moderate ID, ASD with ID, ASD without ID and then~~  
22 ~~the comparison population. Thus the rate of hospitalisation was positively correlated with the~~  
23 ~~severity of ID. Although recent studies in the US<sup>17</sup> and Denmark<sup>22</sup> have investigated the~~  
24 ~~hospitalisation burden for children with autism, and found that individuals with autism had~~  
25 ~~significantly higher lengths of stay and that costs were considerably more than for those without~~  
26 ~~autism. The Danish study also found that children with ASD had an increased rate of contact with~~  
27 ~~hospital, regardless of the cause of their hospital admission. However, this is the first unlike our~~  
28 ~~study neither of these two studies were able to compare the hospitalisation patterns of children~~  
29 ~~with ASD with those of children with ID and ID with the rest of a total population over an extended~~  
30 ~~time period. What we found was that the highest rate of hospitalisations occurred among the severe~~  
31 ~~ID group, followed by those with a known biomedical cause for their ID, mild/moderate ID, ASD~~  
32 ~~with ID, ASD without ID and then the comparison population. Thus the rate of hospitalisation was~~  
33 ~~positively correlated with the severity of ID. The current Our study was able to show demonstrate~~  
34 the gradient of risk between the groups over the study period using the same data methods, whole-  
35 of-population sampling and controlling for interaction variables. We have also shown an increasing  
36 discrepancy in hospitalisations over time between those with severe ID and no ASD and those with  
37 a biomedical cause, particularly at younger ages. One possible explanation is that in more recent  
38  
39  
40  
41  
42  
43  
44  
45  
46  
47  
48  
49  
50  
51  
52  
53  
54  
55  
56  
57  
58  
59  
60

1 years the aetiology of severe intellectual disability is being increasingly identified through new  
2 genetic techniques<sup>25,26</sup> and thus there has been a diagnostic transfer from those with severe ID of  
3 unknown cause to those with a biomedical cause over time. Another explanation may be the  
4 improved survival in those with severe ID of unknown cause which is associated with ongoing high  
5 medical needs.

6  
7  
8  
9  
10  
11  
12  
13  
14  
15 Various comorbid health conditions affect children with ID, including epilepsy, skin conditions,  
16 sensory loss, fractures and psychiatric disorders.<sup>2-4</sup> However apart from individual conditions such  
17 as Down syndrome,<sup>6</sup> Rett syndrome,<sup>27</sup> Tuberous Sclerosis<sup>28</sup> and Angelman syndrome<sup>29</sup> and a  
18 recent paper describing the increase over time in resource utilisation by children with neurological  
19 impairment,<sup>30</sup> there is a dearth of population-based data on medical co-morbidities associated with  
20 ID. Our results would suggest that, although ID may be under-recognised and under-researched in  
21 comparison to autism, its associated health burden should not be underestimated. In Canada it has  
22 been shown that for ambulatory care sensitive (ACS) conditions, people with an ID are hospitalised  
23 at six times the rate of those without an ID, with the rate ratio peaking at double this for those aged  
24 30-39 years.<sup>31</sup> This may reflect a lack of appropriate and accessible primary care for people with  
25 ID, particularly for those transitioning from the paediatric health care system. The highest  
26 hospitalisation rate ratio was for epilepsy, known to be a common co-morbid condition for people  
27 with ID<sup>3</sup>, and a condition with a high level of impact on the life of the individual and their family.<sup>32</sup>

28  
29  
30  
31  
32  
33  
34  
35  
36  
37  
38  
39  
40  
41  
42  
43  
44  
45  
46 As with ID, various comorbid health conditions including gastrointestinal disorders, sleep  
47 disturbances, sensory impairments and, diabetes mellitus type 1 and epilepsy also occur in ASD.<sup>9,</sup>  
48 <sup>16,33,34</sup> Although the hospitalisation burden for children with ASD<sup>17,35</sup> has previously been  
49 reported to be high we have clearly shown in our present study that for children with ID the burden  
50 is considerably greater. Behaviour and communication difficulties are reported to be significant  
51 barriers to utilising hospital care for children with developmental disabilities<sup>19,36</sup> and may increase

1 the overall burden and amount of family support necessary.<sup>37, 38</sup> Such challenging behaviours are  
2 known to be more frequent in children with ASD than in those with ID and thus may increase the  
3 difficulty in their accessing hospital care. Comorbid psychopathology is particularly common in  
4 children with ASD<sup>39</sup> and the specific types of behaviours associated with ASD may discourage  
5 hospitalisation and also shorten the length of stay.<sup>40</sup> More detailed research on the patterns of  
6 primary and secondary health care use for people with an ID and/or ASD, according to health  
7 burden and sociodemographic status is needed to unpack the associations between these disorders  
8 and increased hospitalisation. Because of the increased risk of hospitalisations of children with ID  
9 and ASD resource planners need to prioritise specialised care allocation for these populations. Lack  
10 of medical and nursing staff trained in developmental disability management skills may have in the  
11 past led to negative experiences, inadequate care and compounded problems.<sup>41, 42</sup> Qualitative  
12 information from parents would help to understand these relationships and identify specific factors  
13 that may affect or modify the risk of hospitalisation in these children. Such research would be  
14 important in helping to inform resource planning. We concur with the plea made by Berry and  
15 colleagues to ensure that the current health care system is adequately educated and equipped to care  
16 for this growing proportion of vulnerable children within the hospital population.<sup>30</sup>  
17  
18  
19  
20  
21  
22  
23  
24  
25  
26  
27  
28  
29  
30  
31  
32  
33  
34  
35  
36  
37  
38

39 A strength of our study has been the ability to use population-based data on children's  
40 hospitalisations and link these to sources of disability diagnosis (i.e. presence of ID or ASD). By  
41 including birth year in the model we were able to account for these changes over time and show  
42 how the patterns of risk of hospitalisation changed for individuals in the different categories. We  
43 also accounted for possible confounding by pre-term birth status, known to be associated with  
44 increased childhood hospitalisations<sup>43</sup> and demonstrated the consistent effect of pre-term birth on  
45 hospitalisation rates across all case groups and the rest of the population. Weaknesses in our study  
46 included exclusion from our modelling of hospitalisation history in the first year of life, which may  
47 indeed change later risk of hospitalisation. This was lack of access to birth date data (for privacy  
48  
49  
50  
51  
52  
53  
54  
55  
56  
57  
58  
59  
60

1 reasons) and to a change in coding practises in the WA healthcare system that occurred in the mid-  
2  
3  
4 1990s.  
5  
6  
7

8 Children with developmental disabilities have an increased risk of hospitalisation, the extent of  
9  
10 which varies according to the type of disability and level of intellectual functioning. Future research  
11  
12 should investigate how hospitalisations relate to underlying morbidities, common in intellectual  
13  
14 disability and less so in autism, and also consider the role of access to primary care in preventing  
15  
16 unnecessary hospitalisation. A better understanding of the patterns of hospitalisation for these  
17  
18 children will help establish resource planning opportunities for the specific services required to  
19  
20 meet their increasing needs.<sup>44</sup>  
21  
22  
23  
24  
25

## 26 Acknowledgements

27  
28 The authors are grateful to the Disability Services Commission, the Telethon Institute for Child  
29  
30 Health Research, the Western Australia Department of Education, the Catholic Education Office  
31  
32 and the Association of Independent Schools of Western Australia, for assistance with data  
33  
34 collection for the IDEA database. We thank Dr Geoff Hammond for his statistical advice on aspects  
35  
36 of the paper.  
37

38 Funding Source: This study was supported by Program Grant #303189 from the Australian National  
39  
40 Health and Medical Research Council (NHMRC) and NHMRC Senior Research Fellowship  
41  
42 #572742 (Dr Helen Leonard).  
43  
44

45 Financial Disclosure Statement: Nothing to disclose  
46  
47

48 Conflict of Interest: The authors have no conflicts of interest.  
49  
50  
51  
52

## 53 References

54  
55 1. Leonard H, Petterson B, Bower C, Sanders R. Prevalence of intellectual disability in  
56  
57 Western Australia. *Paediatr Perinat Epidemiol*. 2003;17:58-67.  
58  
59  
60

2. Jansen DE, Krol B, Groothoff JW, Post D. People with intellectual disability and their health problems: a review of comparative studies. *J Intell Disabil Res.* 2004;48(Pt 2):93-102. Epub 2004/01/16.
3. Oeseburg B, Dijkstra GJ, Groothoff JW, Reijneveld SA, Jansen DE. Prevalence of chronic health conditions in children with intellectual disability: a systematic literature review. *Intellect Dev Disabil.* 2011;49(2):59-85.
4. van Schrojenstein Lantman-de Valk HMJ. Health in People with Intellectual Disabilities: Current Knowledge and Gaps in Knowledge. *J Appl Res Intellect Disabil.* 2005;18(4):325-33.
5. Leonard H, Wen X. The epidemiology of mental retardation: challenges and opportunities in the new millennium. *Ment Retard Dev D R.* 2002;8(3):117-34.
6. Thomas K, Girdler S, Bourke J, Deshpande A, Bathgate K, Fehr S, Leonard H. Overview of Health Issues in School-aged Children with Down Syndrome. In: Urbano R, C., editor. *Int Rev Res Ment Ret: Academic Press;* 2010. p. p. 67-106.
7. Cassidy SB, Schwartz S, Miller JL, Driscoll DJ. Prader-Willi syndrome. *Genet Med.* 2012;14(1):10-26. Epub 2012/01/13.
8. Williams K, Leonard H, Tursan d'Espaignet E, Colvin L, Slack-Smith L, Stanley F. Hospitalisations from birth to 5 years in a population cohort of Western Australian children with intellectual disability. *Arch Dis Child.* 2005;90(12):1243-8.
9. Schieve LA, Gonzalez V, Boulet SL, Visser SN, Rice CE, Braun KV, Boyle CA. Concurrent medical conditions and health care use and needs among children with learning and behavioral developmental disabilities, National Health Interview Survey, 2006-2010. *Res Dev Disabil.* 2012;33(2):467-76. Epub 2011/11/29.
10. Einfeld SL, Tonge BJ. Population prevalence of psychopathology in children and adolescents with intellectual disability: II. Epidemiological findings. *J Intell Disabil Res.* 1996;40(Pt 2):99-109.
11. Balogh RS, Hunter D, Ouellette-Kuntz H. Hospital Utilization among Persons with an Intellectual Disability, Ontario, Canada, 1995–2001. *J Appl Res Intellect Disabil.* 2005;18(2):181-90.
12. American Psychiatric Association. *Diagnostic and Statistical Manual of Mental Health Disorders 4th Edition.* Washington DC: American Psychiatric Association; 1994.
13. Leonard H, Dixon G, Whitehouse A, Bourke J, Aiberti K, Nassar N, Bower C, Glasson E. Unpacking the complex nature of the autism epidemic. *Res Autism Spect Dis.* 2010;4(4):548-54.
14. Baio J. Prevalence of autism spectrum disorders-Autism and Developmental Disabilities Monitoring Network, 14 Sites, United States 2008. *MMWR CDC Surveill Summ.* 2012;61(3):1-19.
15. Leonard H, Glasson E, Nassar N, Whitehouse A, Bebbington A, Bourke J, Jacoby P, Dixon G, Malacova E, Bower C, Stanley F. Autism and intellectual disability are differentially related to sociodemographic background at birth. *PLoS One.* 2011;6(3):e17875. Epub 2011/04/12.
16. Kohane IS, McMurry A, Weber G, MacFadden D, Rappaport L, Kunkel L, Bickel J, Wattanasin N, Spence S, Murphy S, Churchill S. The co-morbidity burden of children and young adults with autism spectrum disorders. *PLoS One.* 2012;7(4):e33224. Epub 2012/04/19.
17. Lokhandwala T, Khanna R, West-Strum D. Hospitalization burden among individuals with autism. *J Autism Dev Disord.* 2012;42(1):95-104. Epub 2011/03/16.
18. Thomas K, Bourke J, Girdler S, Bebbington A, Jacoby P, Leonard H. Variation over time in medical conditions and health service utilization of children with Down syndrome. *J Pediatr.* 2011;158(2):194-200 e1.

19. Lunskey Y, Lin E, Balogh R, Klein-Geltink J, Bennie J, Wilton AS, Kurdyak P. Are adults with developmental disabilities more likely to visit EDs? *Am J Emerg Med*. 2011;29(4):463-5.
20. Lunskey Y, Balogh R, Khodaverdian A, Elliott D, Jaskulski C, Morris S. A Comparison of Medical and Psychobehavioral Emergency Department Visits Made by Adults with Intellectual Disabilities. *Emerg Med Int*. 2012;2012:6.
21. Petterson B, Leonard H, Bourke J, Sanders R, Chalmers R, Jacoby P, Bower C. IDEA (Intellectual Disability Exploring Answers): a population-based database for intellectual disability in Western Australia. *Ann Hum Biol*. 2005;32(2):237-43.
22. Leonard H, Petterson B, De Klerk N, Zubrick SR, Glasson E, Sanders R, Bower C. Association of sociodemographic characteristics of children with intellectual disability in Western Australia. *Soc Sci Med*. 2005;60(7):1499-513.
23. Yeargin-Allsopp M, Murphy CC, Cordero JF, Decoufle P, Hollowell JG. Reported biomedical causes and associated medical conditions for mental retardation among 10-year-old children, metropolitan Atlanta, 1985 to 1987. *Dev Med Child Neurol*. 1997;39(3):142-9. Epub 1997/03/01.
24. Holman CD, Bass AJ, Rosman DL, Smith MB, Semmens JB, Glasson EJ, Brook EL, Trutwein B, Rouse IL, Watson CR, de Klerk NH, Stanley FJ. A decade of data linkage in Western Australia: strategic design, applications and benefits of the WA data linkage system. *Aust Health Rev*. 2008;32(4):766-77. Epub 2008/11/05.
25. Jaillard S, Drunat Sv, Bendavid C, Aboura A, Etcheverry A, Journel H, Delahaye Ae, Pasquier L, Bonneau D, Toutain A, Burglen L, Guichet As, Pipiras E, Gilbert-Dussardier B, Benzacken B, Martin-Coignard D, Henry C, David A, Lucas J, Mosser J, David Vr, Odent S, Verloes A, Dubourg Cl. Identification of gene copy number variations in patients with mental retardation using array-CGH: Novel syndromes in a large French series. *Eur J Med Genet*. 2010;53(2):66-75.
26. Koolen DA, Pfundt R, de Leeuw N, Hehir-Kwa JY, Nillesen WM, Neefs I, Scheltinga I, Siermans E, Smeets D, Brunner HG, van Kessel AG, Veltman JA, de Vries BBA. Genomic microarrays in mental retardation: A practical workflow for diagnostic applications. *Hum Mutat*. 2009;30(3):283-92.
27. Young D, Bebbington A, de Klerk N, Bower C, Nagarajan L, Leonard H. The relationship between MECP2 mutation type and health status and service use trajectories over time in a Rett syndrome population. *Res Autism Spect Dis*. 2011;5(1):442-9.
28. Osborne JP, Merrifield J, O'Callaghan FJ. Tuberous sclerosis--what's new? *Arch Dis Child*. 2008;93(9):728-31. Epub 2008/05/06.
29. Williams CA, Driscoll DJ, Dagli AI. Clinical and genetic aspects of Angelman syndrome. *Genet Med*. 2010;12(7):385-95. Epub 2010/05/07.
30. Berry JG, Poduri A, Bonkowsky JL, Zhou J, Graham DA, Welch C, Putney H, Srivastava R. Trends in resource utilization by children with neurological impairment in the United States inpatient health care system: a repeat cross-sectional study. *PLoS Med*. 2012;9(1):e1001158. Epub 2012/01/25.
31. Balogh R, Brownell M, Ouellette-Kuntz H, Colantonio A. Hospitalisation rates for ambulatory care sensitive conditions for persons with and without an intellectual disability--a population perspective. *J Intell Disabil Res*. 2010;54(9):820-32. Epub 2010/08/14.
32. Bowley C, Kerr M. Epilepsy and intellectual disability. *J Intell Disabil Res*. 2000;44 (Pt 5):529-43. Epub 2000/11/18.
33. Lauritsen MB, Mors O, Mortensen PB, Ewald H. Medical disorders among inpatients with autism in Denmark according to ICD-8: a nationwide register-based study. *J Autism Dev Disord*. 2002;32(2):115-9.
34. Bolton PF. Medical conditions in autism spectrum disorders. *J Neurodev Disord*. 2009;1(2):102-13. Epub 2009/06/01.

- 1  
2  
3  
4  
5  
6  
7  
8  
9  
10  
11  
12  
13  
14  
15  
16  
17  
18  
19  
20  
21  
22  
23  
24  
25  
26  
27  
28  
29  
30  
31  
32  
33  
34  
35  
36  
37  
38  
39  
40  
41  
42  
43  
44  
45  
46  
47  
48  
49  
50  
51  
52  
53  
54  
55  
56  
57  
58  
59  
60
35. Atladottir HO, Schendel D, Lauritsen M, Henriksen T, Parner E. Patterns of Contact with Hospital for Children with an Autism Spectrum Disorder: A Danish Register-Based Study. *J Autism Dev Disord*. 2012;42(8):1717-28.
36. van Schrojenstein Lantman-de Valk HMJ, van den Akker M, Maaskant MA, Haveman MJ, Urlings HFJ, Kessels AG, Crebolder HFJK. Prevalence and incidence of health problems in people with intellectual disability. *J Intell Disabil Res*. 1997;41(1):42-51.
37. Hemsley B, Balandin S, Togher L. Narrative analysis of the hospital experience for older parents of people who cannot speak. *J Aging Stud*. 2007;21(3):239-54.
38. Iacono T, Davis R. The experiences of people with developmental disability in Emergency Departments and hospital wards. *Res Dev Disabil*. 2003;24(4):247-64.
39. Brereton AV, Tonge BJ, Einfeld SL. Psychopathology in children and adolescents with autism compared to young people with intellectual disability. *J Autism Dev Disord*. 2006;36(7):863-70. Epub 2006/08/10.
40. Scarpinato N, Bradley J, Kurbjun K, Bateman X, Holtzer B, Ely B. Caring for the child with an autism spectrum disorder in the acute care setting. *J Spec Pediatr Nurs*. 2010;15(3):244-54. Epub 2010/07/14.
41. Lennox N, Diggins J. Knowledge, skills and attitudes: Medical schools' coverage of an ideal curriculum on intellectual disability. *J Intellect Dev Dis*. 1999;24(4):341.
42. Ouellette-Kuntz H. Understanding Health Disparities and Inequities Faced by Individuals with Intellectual Disabilities. *J Appl Res Intellect Disabil*. 2005;18(2):113-21.
43. Petrou S, Mehta Z, Hockley C, Cook-Mozaffari P, Henderson J, Goldacre M. The impact of preterm birth on hospital inpatient admissions and costs during the first 5 years of life. *Pediatrics*. 2003;112(6 Pt 1):1290-7.
44. Brownell MD, Derksen SA, Jutte DP, Roos NP, Ekuma O, Yallop L. Socio-economic inequities in children's injury rates: has the gradient changed over time? *Can J Public Health*. 2010;101 Suppl 3:S28-31. Epub 2011/03/22.



**Table 1 – Distribution of individuals in different case groups**

| Case-comparison group status | Frequency | Percent | Cumulative |
|------------------------------|-----------|---------|------------|
| No ASD No ID                 | 409,454   | 98.28   | 98.28      |
| Mild/mod ID No ASD           | 4,667     | 1.12    | 99.4       |
| Severe ID No ASD             | 293       | 0.07    | 99.47      |
| ASD & ID                     | 767       | 0.18    | 99.66      |
| ASD No ID                    | 475       | 0.11    | 99.77      |
| Biomedical ID                | 955       | 0.23    | 100        |
| Total                        | 416,611   | 100     |            |

Figure 1 – Nelson-Aalen Cumulative Hazard for Hospitalisation (number of hospitalisations expected by Age shown on x-axis)

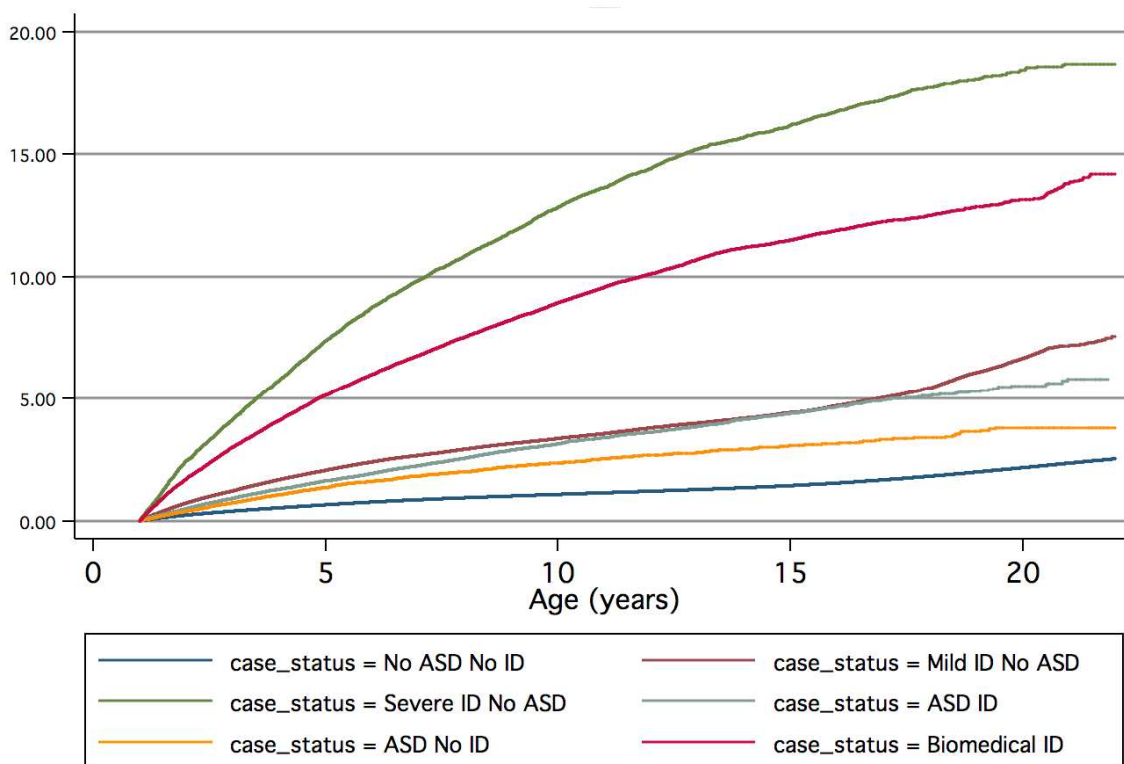

Review only

**Table 2 - Cox Proportional Hazard Ratios for Hospitalisation by Case Group**

| Case group         | Hazard Ratio | Robust Standard Error | p-value* | 95% Confidence Interval |      |
|--------------------|--------------|-----------------------|----------|-------------------------|------|
| No ASD No ID       | 1.0          | -                     |          |                         |      |
| Mild/mod ID No ASD | 3.1          | 0.16                  | <0.001   | 2.8                     | 3.4  |
| Severe ID No ASD   | 10.3         | 0.93                  | <0.001   | 8.7                     | 12.3 |
| ASD & ID           | 2.8          | 0.31                  | <0.001   | 2.3                     | 3.5  |
| ASD No ID          | 2.1          | 0.13                  | <0.001   | 1.8                     | 2.4  |
| Biomedical ID      | 7.4          | 0.34                  | <0.001   | 6.7                     | 8.1  |

\*Wald test

For peer review only

**Figure 2 – Kaplan-Meier Curves showing proportion of individuals in each case group who have not been hospitalised by age, for each birth cohort**

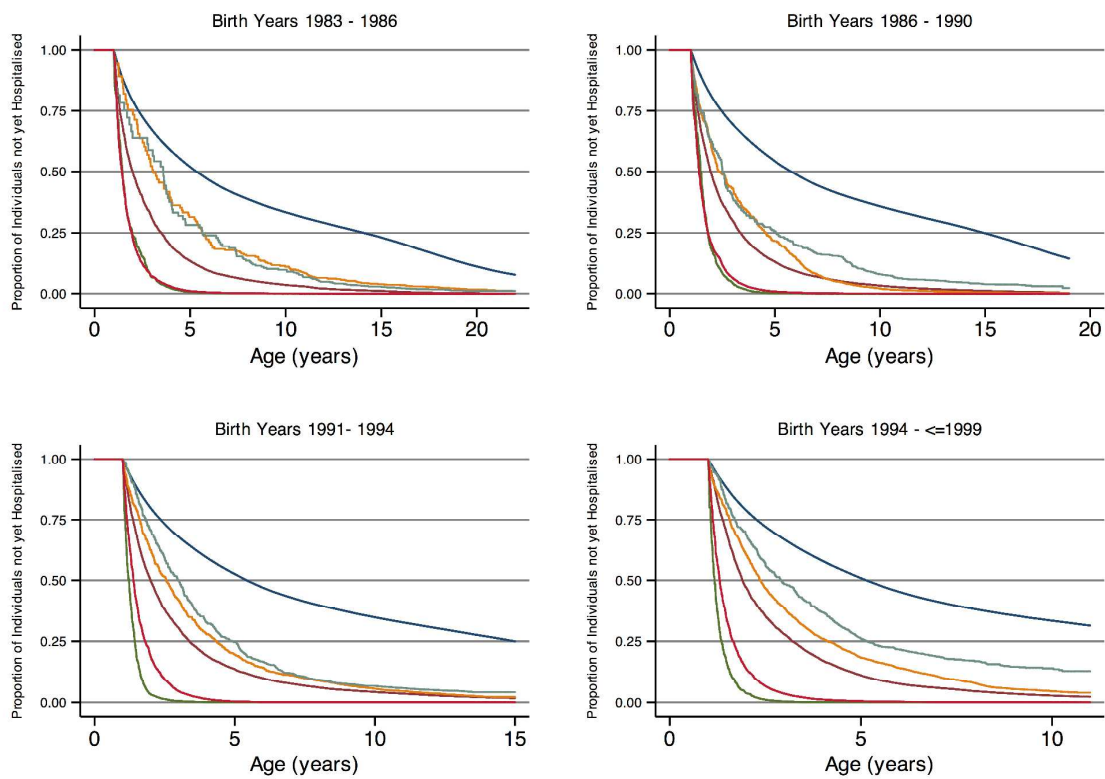

only

Table 3 – Rate Estimate comparison (using **margins, dydx**) for birth year band trend over the different case-status groups.

| <u>Birth Year Band</u> | <u>Case-Status</u>      | <u>Rate Estimate difference</u>                    | <u>95% Confidence Interval</u> |               | <u>P-value</u>   |
|------------------------|-------------------------|----------------------------------------------------|--------------------------------|---------------|------------------|
| <u>1983 - 1986</u>     | <u>Affected</u>         | <u>Baseline for Affected status Rate Estimate</u>  |                                |               |                  |
|                        | <u>No ASD No ID</u>     | <u>Baseline for No ASD No ID Rate Estimate</u>     |                                |               |                  |
| <u>1986 - 1990</u>     | <u>Affected</u>         | <u>0.573</u>                                       | <u>0.445</u>                   | <u>0.701</u>  | <u>&lt;0.001</u> |
|                        | <u>No ASD No ID</u>     | <u>-0.046</u>                                      | <u>-0.053</u>                  | <u>-0.039</u> | <u>&lt;0.001</u> |
| <u>1990 - 1994</u>     | <u>Affected</u>         | <u>0.056</u>                                       | <u>0.010</u>                   | <u>0.102</u>  | <u>0.017</u>     |
|                        | <u>No ASD No ID</u>     | <u>-0.266</u>                                      | <u>-0.811</u>                  | <u>0.278</u>  | <u>0.338</u>     |
| <u>1994 - 1999</u>     | <u>Affected</u>         | <u>0.075</u>                                       | <u>0.028</u>                   | <u>0.122</u>  | <u>0.002</u>     |
|                        | <u>No ASD No ID</u>     | <u>0.263</u>                                       | <u>-0.388</u>                  | <u>0.913</u>  | <u>0.429</u>     |
| <u>1983 - 1986</u>     | <u>All other Groups</u> | <u>Baseline for All other groups Rate Estimate</u> |                                |               |                  |
|                        | <u>Mild ID no ASD</u>   | <u>Baseline for Mild ID No ASD Rate Estimate</u>   |                                |               |                  |
| <u>1986 - 1990</u>     | <u>All other Groups</u> | <u>-0.014</u>                                      | <u>-0.023</u>                  | <u>-0.005</u> | <u>0.001</u>     |
|                        | <u>Mild ID no ASD</u>   | <u>-0.210</u>                                      | <u>-0.328</u>                  | <u>-0.091</u> | <u>0.001</u>     |
| <u>1990 - 1994</u>     | <u>All other Groups</u> | <u>0.042</u>                                       | <u>0.032</u>                   | <u>0.052</u>  | <u>&lt;0.001</u> |
|                        | <u>Mild ID no ASD</u>   | <u>-0.332</u>                                      | <u>-0.452</u>                  | <u>-0.212</u> | <u>&lt;0.001</u> |
| <u>1994 - 1999</u>     | <u>All other Groups</u> | <u>0.081</u>                                       | <u>0.070</u>                   | <u>0.091</u>  | <u>&lt;0.001</u> |
|                        | <u>Mild ID no ASD</u>   | <u>0.084</u>                                       | <u>-0.056</u>                  | <u>0.224</u>  | <u>0.239</u>     |
| <u>1983 - 1986</u>     | <u>All other Groups</u> | <u>Baseline for All other groups Rate Estimate</u> |                                |               |                  |
|                        | <u>Severe ID no ASD</u> | <u>Baseline for Severe ID no ASD Rate Estimate</u> |                                |               |                  |
| <u>1986 - 1990</u>     | <u>All other Groups</u> | <u>-0.035</u>                                      | <u>-0.043</u>                  | <u>-0.026</u> | <u>&lt;0.001</u> |
|                        | <u>Severe ID no ASD</u> | <u>3.570</u>                                       | <u>2.905</u>                   | <u>4.236</u>  | <u>&lt;0.001</u> |
| <u>1990 - 1994</u>     | <u>All other Groups</u> | <u>-0.001</u>                                      | <u>-0.010</u>                  | <u>0.009</u>  | <u>0.841</u>     |
|                        | <u>Severe ID no ASD</u> | <u>7.901</u>                                       | <u>7.042</u>                   | <u>8.760</u>  | <u>&lt;0.001</u> |
| <u>1994 - 1999</u>     | <u>All other Groups</u> | <u>0.040</u>                                       | <u>0.030</u>                   | <u>0.050</u>  | <u>&lt;0.001</u> |
|                        | <u>Severe ID no ASD</u> | <u>9.399</u>                                       | <u>8.312</u>                   | <u>10.487</u> | <u>&lt;0.001</u> |

| <u>Birth Year Band</u> | <u>Case-Status</u>      | <u>Rate Estimate difference</u>                    | <u>95% Confidence Interval</u> |               | <u>P-value</u>   |
|------------------------|-------------------------|----------------------------------------------------|--------------------------------|---------------|------------------|
| <u>1983 - 1986</u>     | <u>All other Groups</u> | <u>Baseline for All other groups Rate Estimate</u> |                                |               |                  |
|                        | <u>ASD &amp; ID</u>     | <u>Baseline for ASD &amp; ID Rate Estimate</u>     |                                |               |                  |
| <u>1986 - 1990</u>     | <u>All other Groups</u> | <u>-0.021</u>                                      | <u>-0.030</u>                  | <u>-0.012</u> | <u>&lt;0.001</u> |
|                        | <u>ASD &amp; ID</u>     | <u>1.488</u>                                       | <u>1.115</u>                   | <u>1.862</u>  | <u>&lt;0.001</u> |
| <u>1990 - 1994</u>     | <u>All other Groups</u> | <u>0.046</u>                                       | <u>0.034</u>                   | <u>0.057</u>  | <u>&lt;0.001</u> |
|                        | <u>ASD &amp; ID</u>     | <u>0.855</u>                                       | <u>0.467</u>                   | <u>1.242</u>  | <u>&lt;0.001</u> |
| <u>1994 - 1999</u>     | <u>All other Groups</u> | <u>0.079</u>                                       | <u>0.068</u>                   | <u>0.090</u>  | <u>&lt;0.001</u> |
|                        | <u>ASD &amp; ID</u>     | <u>0.835</u>                                       | <u>0.502</u>                   | <u>1.168</u>  | <u>&lt;0.001</u> |
| <u>1983 - 1986</u>     | <u>All other Groups</u> | <u>Baseline for All other groups Rate Estimate</u> |                                |               |                  |
|                        | <u>ASD no ID</u>        | <u>Baseline for ASD &amp; no ID Rate Estimate</u>  |                                |               |                  |
| <u>1986 - 1990</u>     | <u>All other Groups</u> | <u>-0.016</u>                                      | <u>-0.025</u>                  | <u>-0.008</u> | <u>&lt;0.001</u> |
|                        | <u>ASD no ID</u>        | <u>0.104</u>                                       | <u>-0.321</u>                  | <u>0.530</u>  | <u>0.631</u>     |
| <u>1990 - 1994</u>     | <u>All other Groups</u> | <u>0.048</u>                                       | <u>0.036</u>                   | <u>0.059</u>  | <u>&lt;0.001</u> |
|                        | <u>ASD no ID</u>        | <u>0.493</u>                                       | <u>0.057</u>                   | <u>0.929</u>  | <u>0.027</u>     |
| <u>1994 - 1999</u>     | <u>All other Groups</u> | <u>0.082</u>                                       | <u>0.071</u>                   | <u>0.093</u>  | <u>&lt;0.001</u> |
|                        | <u>ASD no ID</u>        | <u>-0.064</u>                                      | <u>-0.463</u>                  | <u>0.335</u>  | <u>0.754</u>     |
| <u>1983 - 1986</u>     | <u>All other Groups</u> | <u>Baseline for All other groups Rate Estimate</u> |                                |               |                  |
|                        | <u>Biomedical ID</u>    | <u>Baseline for Biomedical ID Rate Estimate</u>    |                                |               |                  |
| <u>1986 - 1990</u>     | <u>All other Groups</u> | <u>-0.031</u>                                      | <u>-0.039</u>                  | <u>-0.023</u> | <u>&lt;0.001</u> |
|                        | <u>Biomedical ID</u>    | <u>1.439</u>                                       | <u>1.100</u>                   | <u>1.777</u>  | <u>&lt;0.001</u> |
| <u>1990 - 1994</u>     | <u>All other Groups</u> | <u>-0.005</u>                                      | <u>-0.015</u>                  | <u>0.005</u>  | <u>0.340</u>     |
|                        | <u>Biomedical ID</u>    | <u>5.307</u>                                       | <u>4.828</u>                   | <u>5.786</u>  | <u>&lt;0.001</u> |
| <u>1994 - 1999</u>     | <u>All other Groups</u> | <u>0.055</u>                                       | <u>0.044</u>                   | <u>0.065</u>  | <u>&lt;0.001</u> |
|                        | <u>Biomedical ID</u>    | <u>2.731</u>                                       | <u>2.322</u>                   | <u>3.140</u>  | <u>&lt;0.001</u> |

1  
2  
3  
4  
5  
6  
7  
8  
9  
10  
11  
12  
13  
14  
15  
16  
17  
18  
19  
20  
21  
22  
23  
24  
25  
26  
27  
28  
29  
30  
31  
32  
33  
34  
35  
36  
37  
38  
39  
40  
41  
42  
43  
44  
45  
46  
47  
48  
49  
50  
51  
52  
53  
54  
55  
56  
57  
58  
59  
60

**Figure 3 – Hazard Ratios from multivariate interaction model by birth year and case group status**

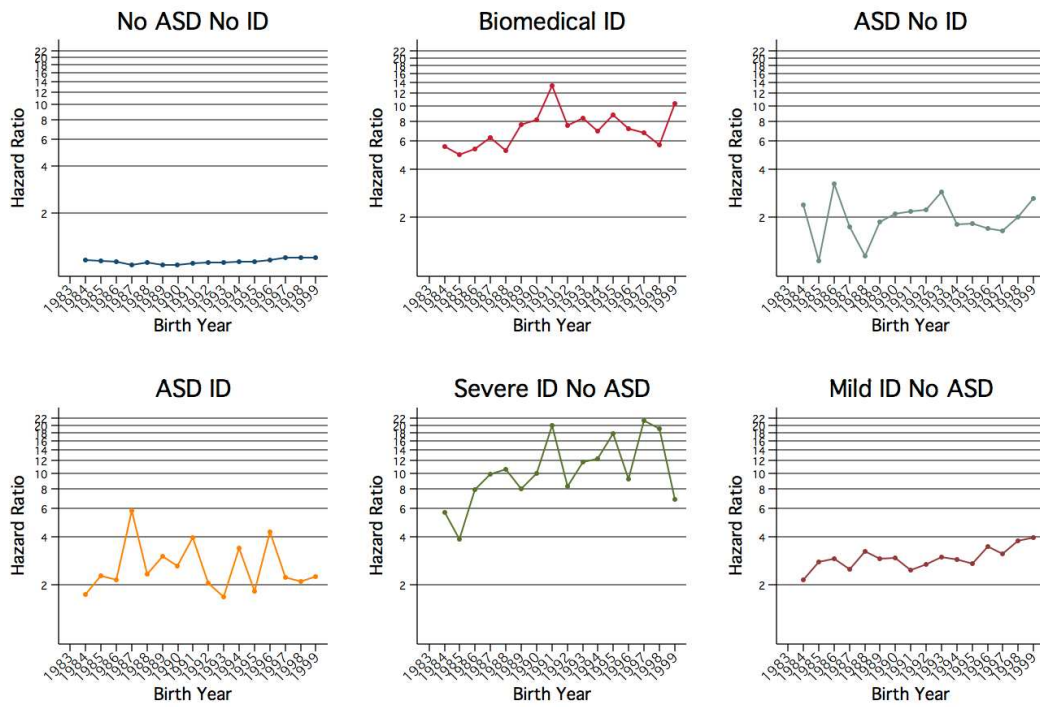

view only

Table 4

Hazard Ratios, 95% Confidence Intervals and p-values compared to individuals without ASD or ID born in 1993 as shown in Figure 3.

| Case Status    | Birth Year | Hazard Ratio | 95% Confidence Interval |        | P-value (compared to baseline) |
|----------------|------------|--------------|-------------------------|--------|--------------------------------|
| No ASD or ID   | 1983       |              | baseline                |        |                                |
|                | 1984       | 0.997        | 0.985                   | 1.009  | 0.587                          |
|                | 1985       | 0.994        | 0.982                   | 1.007  | 0.352                          |
|                | 1986       | 0.974        | 0.962                   | 0.987  | <0.001                         |
|                | 1987       | 0.930        | 0.918                   | 0.943  | <0.001                         |
|                | 1988       | 0.960        | 0.947                   | 0.973  | <0.001                         |
|                | 1989       | 0.934        | 0.921                   | 0.947  | <0.001                         |
|                | 1990       | 0.929        | 0.915                   | 0.942  | <0.001                         |
|                | 1991       | 0.946        | 0.932                   | 0.960  | <0.001                         |
|                | 1992       | 0.960        | 0.946                   | 0.974  | <0.001                         |
|                | 1993       | 0.968        | 0.954                   | 0.982  | <0.001                         |
|                | 1994       | 0.972        | 0.958                   | 0.987  | <0.001                         |
|                | 1995       | 0.975        | 0.960                   | 0.990  | 0.001                          |
|                | 1996       | 0.999        | 0.984                   | 1.015  | 0.943                          |
|                | 1997       | 1.036        | 1.019                   | 1.052  | <0.001                         |
|                | 1998       | 1.041        | 1.024                   | 1.058  | <0.001                         |
| 1999           | 1.031      | 1.014        | 1.049                   | <0.001 |                                |
| Mild ID no ASD | 1983       | 4.626        | 4.418                   | 4.844  | <0.001                         |
|                | 1984       | 2.192        | 2.061                   | 2.332  | <0.001                         |
|                | 1985       | 2.852        | 2.704                   | 3.009  | <0.001                         |
|                | 1986       | 2.958        | 2.811                   | 3.112  | <0.001                         |
|                | 1987       | 2.558        | 2.436                   | 2.686  | <0.001                         |
|                | 1988       | 3.328        | 3.175                   | 3.488  | <0.001                         |
|                | 1989       | 3.014        | 2.869                   | 3.166  | <0.001                         |
|                | 1990       | 3.019        | 2.875                   | 3.170  | <0.001                         |
|                | 1991       | 2.539        | 2.408                   | 2.678  | <0.001                         |
|                | 1992       | 2.736        | 2.601                   | 2.879  | <0.001                         |
|                | 1993       | 3.079        | 2.904                   | 3.266  | <0.001                         |
|                | 1994       | 3.017        | 2.848                   | 3.197  | <0.001                         |
|                | 1995       | 2.821        | 2.632                   | 3.024  | <0.001                         |
| 1996           | 3.662      | 3.421        | 3.920                   | <0.001 |                                |
| 1997           | 3.254      | 2.960        | 3.577                   | <0.001 |                                |
| 1998           | 3.896      | 3.498        | 4.339                   | <0.001 |                                |
| 1999           | 4.001      | 3.549        | 4.510                   | <0.001 |                                |



| <u>Case Status</u>      | <u>Birth Year</u> | <u>Hazard Ratio</u> | <u>95% Confidence Interval</u> |                  | <u>P-value (compared to baseline)</u> |
|-------------------------|-------------------|---------------------|--------------------------------|------------------|---------------------------------------|
| <u>Severe ID no ASD</u> | <u>1983</u>       | <u>6.813</u>        | <u>6.046</u>                   | <u>7.676</u>     | <u>&lt;0.001</u>                      |
|                         | <u>1984</u>       | <u>5.783</u>        | <u>5.052</u>                   | <u>6.620</u>     | <u>&lt;0.001</u>                      |
|                         | <u>1985</u>       | <u>4.619</u>        | <u>4.014</u>                   | <u>5.314</u>     | <u>&lt;0.001</u>                      |
|                         | <u>1986</u>       | <u>8.095</u>        | <u>7.252</u>                   | <u>9.038</u>     | <u>&lt;0.001</u>                      |
|                         | <u>1987</u>       | <u>10.362</u>       | <u>9.257</u>                   | <u>11.599</u>    | <u>&lt;0.001</u>                      |
|                         | <u>1988</u>       | <u>11.129</u>       | <u>10.030</u>                  | <u>12.348</u>    | <u>&lt;0.001</u>                      |
|                         | <u>1989</u>       | <u>8.089</u>        | <u>7.245</u>                   | <u>9.033</u>     | <u>&lt;0.001</u>                      |
|                         | <u>1990</u>       | <u>11.263</u>       | <u>10.049</u>                  | <u>12.625</u>    | <u>&lt;0.001</u>                      |
|                         | <u>1991</u>       | <u>20.315</u>       | <u>18.789</u>                  | <u>21.965</u>    | <u>&lt;0.001</u>                      |
|                         | <u>1992</u>       | <u>8.552</u>        | <u>7.491</u>                   | <u>9.763</u>     | <u>&lt;0.001</u>                      |
|                         | <u>1993</u>       | <u>11.824</u>       | <u>10.050</u>                  | <u>13.909</u>    | <u>&lt;0.001</u>                      |
|                         | <u>1994</u>       | <u>12.425</u>       | <u>10.556</u>                  | <u>14.626</u>    | <u>&lt;0.001</u>                      |
|                         | <u>1995</u>       | <u>17.095</u>       | <u>14.755</u>                  | <u>19.806</u>    | <u>&lt;0.001</u>                      |
|                         | <u>1996</u>       | <u>9.998</u>        | <u>8.007</u>                   | <u>12.485</u>    | <u>&lt;0.001</u>                      |
|                         | <u>1997</u>       | <u>20.663</u>       | <u>17.483</u>                  | <u>24.422</u>    | <u>&lt;0.001</u>                      |
|                         | <u>1998</u>       | <u>20.499</u>       | <u>18.260</u>                  | <u>23.013</u>    | <u>&lt;0.001</u>                      |
| <u>1999</u>             | <u>7.245</u>      | <u>5.612</u>        | <u>9.353</u>                   | <u>&lt;0.001</u> |                                       |
| <u>ASD &amp; ID</u>     | <u>1983</u>       | <u>1.352</u>        | <u>0.945</u>                   | <u>1.934</u>     | <u>0.099</u>                          |
|                         | <u>1984</u>       | <u>1.743</u>        | <u>1.313</u>                   | <u>2.313</u>     | <u>&lt;0.001</u>                      |
|                         | <u>1985</u>       | <u>2.206</u>        | <u>1.745</u>                   | <u>2.789</u>     | <u>&lt;0.001</u>                      |
|                         | <u>1986</u>       | <u>2.081</u>        | <u>1.664</u>                   | <u>2.602</u>     | <u>&lt;0.001</u>                      |
|                         | <u>1987</u>       | <u>5.996</u>        | <u>5.353</u>                   | <u>6.715</u>     | <u>&lt;0.001</u>                      |
|                         | <u>1988</u>       | <u>2.246</u>        | <u>1.838</u>                   | <u>2.744</u>     | <u>&lt;0.001</u>                      |
|                         | <u>1989</u>       | <u>3.081</u>        | <u>2.665</u>                   | <u>3.563</u>     | <u>&lt;0.001</u>                      |
|                         | <u>1990</u>       | <u>2.642</u>        | <u>2.227</u>                   | <u>3.134</u>     | <u>&lt;0.001</u>                      |
|                         | <u>1991</u>       | <u>4.074</u>        | <u>3.579</u>                   | <u>4.638</u>     | <u>&lt;0.001</u>                      |
|                         | <u>1992</u>       | <u>2.039</u>        | <u>1.696</u>                   | <u>2.450</u>     | <u>&lt;0.001</u>                      |
|                         | <u>1993</u>       | <u>1.762</u>        | <u>1.428</u>                   | <u>2.175</u>     | <u>&lt;0.001</u>                      |
|                         | <u>1994</u>       | <u>3.448</u>        | <u>3.021</u>                   | <u>3.936</u>     | <u>&lt;0.001</u>                      |
|                         | <u>1995</u>       | <u>1.821</u>        | <u>1.516</u>                   | <u>2.186</u>     | <u>&lt;0.001</u>                      |
| <u>1996</u>             | <u>4.367</u>      | <u>3.872</u>        | <u>4.925</u>                   | <u>&lt;0.001</u> |                                       |
| <u>1997</u>             | <u>2.225</u>      | <u>1.927</u>        | <u>2.568</u>                   | <u>&lt;0.001</u> |                                       |
| <u>1998</u>             | <u>2.102</u>      | <u>1.800</u>        | <u>2.454</u>                   | <u>&lt;0.001</u> |                                       |
| <u>1999</u>             | <u>2.264</u>      | <u>1.936</u>        | <u>2.647</u>                   | <u>&lt;0.001</u> |                                       |

| Case Status   | Birth Year | Hazard Ratio | 95% Confidence Interval |        | P-value (compared to baseline) |
|---------------|------------|--------------|-------------------------|--------|--------------------------------|
| ASD no ID     | 1983       | 2.048        | 1.508                   | 2.782  | <0.001                         |
|               | 1984       | 2.321        | 1.773                   | 3.038  | <0.001                         |
|               | 1985       | 1.095        | 0.671                   | 1.787  | 0.718                          |
|               | 1986       | 3.387        | 2.661                   | 4.312  | <0.001                         |
|               | 1987       | 1.720        | 1.338                   | 2.211  | <0.001                         |
|               | 1988       | 1.104        | 0.712                   | 1.712  | 0.657                          |
|               | 1989       | 1.936        | 1.527                   | 2.456  | <0.001                         |
|               | 1990       | 2.088        | 1.690                   | 2.580  | <0.001                         |
|               | 1991       | 2.139        | 1.777                   | 2.575  | <0.001                         |
|               | 1992       | 2.207        | 1.843                   | 2.645  | <0.001                         |
|               | 1993       | 2.928        | 2.471                   | 3.469  | <0.001                         |
|               | 1994       | 1.819        | 1.477                   | 2.239  | <0.001                         |
|               | 1995       | 1.874        | 1.524                   | 2.305  | <0.001                         |
|               | 1996       | 1.691        | 1.384                   | 2.066  | <0.001                         |
|               | 1997       | 1.638        | 1.293                   | 2.074  | <0.001                         |
| 1998          | 2.080      | 1.562        | 2.768                   | <0.001 |                                |
| 1999          | 2.728      | 2.001        | 3.720                   | <0.001 |                                |
| Biomedical ID | 1983       | 4.812        | 4.443                   | 5.211  | <0.001                         |
|               | 1984       | 5.748        | 5.328                   | 6.200  | <0.001                         |
|               | 1985       | 5.012        | 4.615                   | 5.444  | <0.001                         |
|               | 1986       | 5.480        | 5.041                   | 5.958  | <0.001                         |
|               | 1987       | 6.311        | 5.832                   | 6.829  | <0.001                         |
|               | 1988       | 5.369        | 4.900                   | 5.883  | <0.001                         |
|               | 1989       | 7.738        | 7.095                   | 8.438  | <0.001                         |
|               | 1990       | 8.700        | 8.089                   | 9.358  | <0.001                         |
|               | 1991       | 13.724       | 12.984                  | 14.505 | <0.001                         |
|               | 1992       | 7.796        | 7.161                   | 8.488  | <0.001                         |
|               | 1993       | 8.786        | 8.127                   | 9.497  | <0.001                         |
|               | 1994       | 7.086        | 6.355                   | 7.902  | <0.001                         |
| 1995          | 8.710      | 8.017        | 9.463                   | <0.001 |                                |
| 1996          | 7.535      | 6.798        | 8.353                   | <0.001 |                                |
| 1997          | 7.182      | 6.403        | 8.057                   | <0.001 |                                |
| 1998          | 6.102      | 5.370        | 6.935                   | <0.001 |                                |
| 1999          | 10.575     | 9.584        | 11.667                  | <0.001 |                                |

1  
2  
3  
4  
5  
6  
7  
8  
9  
10  
11  
12  
13  
14  
15  
16  
17  
18  
19  
20  
21  
22  
23  
24  
25  
26  
27  
28  
29  
30  
31  
32  
33  
34  
35  
36  
37  
38  
39  
40  
41  
42  
43  
44  
45  
46  
47  
48  
49  
50  
51  
52  
53  
54  
55  
56  
57  
58  
59  
60

**Figure 4 – Hazard Ratio for hospitalisation risk associated with birth year, pre-term birth and case group status from stratified model**

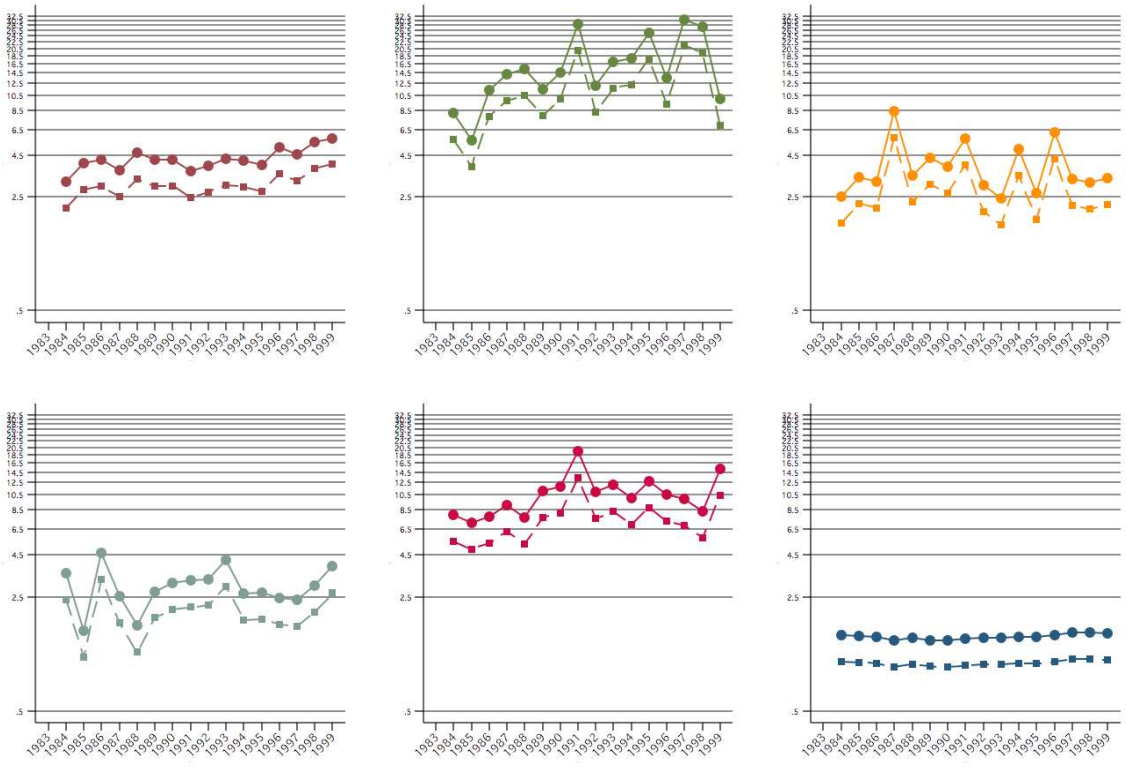

Legend for figure 4

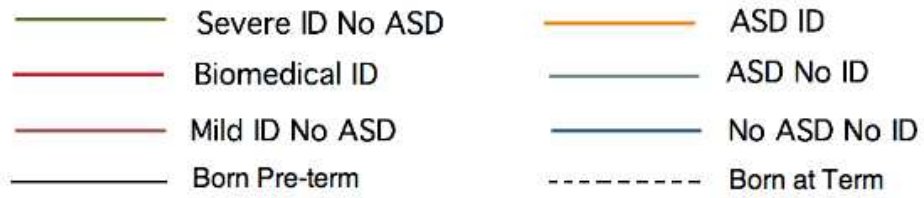

For peer review only

1  
2  
3  
4  
5  
6  
7  
8  
9  
10  
11  
12  
13  
14  
15  
16  
17  
18  
19  
20  
21  
22  
23  
24  
25  
26  
27  
28  
29  
30  
31  
32  
33  
34  
35  
36  
37  
38  
39  
40  
41  
42  
43  
44  
45  
46  
47  
48  
49  
50  
51  
52  
53  
54  
55  
56  
57  
58  
59  
60



583x420mm (300 x 300 DPI)

View only

1  
2  
3  
4  
5  
6  
7  
8  
9  
10  
11  
12  
13  
14  
15  
16  
17  
18  
19  
20  
21  
22  
23  
24  
25  
26  
27  
28  
29  
30  
31  
32  
33  
34  
35  
36  
37  
38  
39  
40  
41  
42  
43  
44  
45  
46  
47  
48  
49  
50  
51  
52  
53  
54  
55  
56  
57  
58  
59  
60

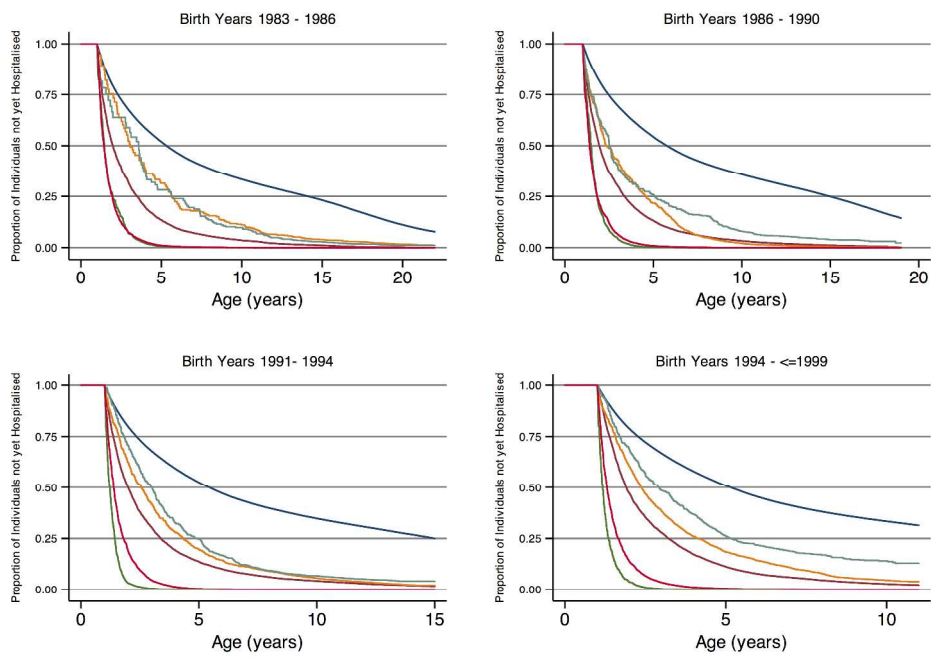

see attached legend file.  
349x254mm (300 x 300 DPI)

view only

1  
2  
3  
4  
5  
6  
7  
8  
9  
10  
11  
12  
13  
14  
15  
16  
17  
18  
19  
20  
21  
22  
23  
24  
25  
26  
27  
28  
29  
30  
31  
32  
33  
34  
35  
36  
37  
38  
39  
40  
41  
42  
43  
44  
45  
46  
47  
48  
49  
50  
51  
52  
53  
54  
55  
56  
57  
58  
59  
60

|                                                                                   |                  |                                                                                    |              |
|-----------------------------------------------------------------------------------|------------------|------------------------------------------------------------------------------------|--------------|
|  | Severe ID No ASD |  | ASD ID       |
|  | Biomedical ID    |  | ASD No ID    |
|  | Mild ID No ASD   |  | No ASD No ID |

164x35mm (300 x 300 DPI)

Or peer review only

1  
2  
3  
4  
5  
6  
7  
8  
9  
10  
11  
12  
13  
14  
15  
16  
17  
18  
19  
20  
21  
22  
23  
24  
25  
26  
27  
28  
29  
30  
31  
32  
33  
34  
35  
36  
37  
38  
39  
40  
41  
42  
43  
44  
45  
46  
47  
48  
49  
50  
51  
52  
53  
54  
55  
56  
57  
58  
59  
60



115x80mm (300 x 300 DPI)

view only



1  
2  
3  
4  
5  
6  
7  
8  
9  
10  
11  
12  
13  
14  
15  
16  
17  
18  
19  
20  
21  
22  
23  
24  
25  
26  
27  
28  
29  
30  
31  
32  
33  
34  
35  
36  
37  
38  
39  
40  
41  
42  
43  
44  
45  
46  
47  
48  
49  
50  
51  
52  
53  
54  
55  
56  
57  
58  
59  
60



see attached Legend file.  
115x80mm (300 x 300 DPI)

view only

1  
2  
3  
4  
5  
6  
7  
8  
9  
10  
11  
12  
13  
14  
15  
16  
17  
18  
19  
20  
21  
22  
23  
24  
25  
26  
27  
28  
29  
30  
31  
32  
33  
34  
35  
36  
37  
38  
39  
40  
41  
42  
43  
44  
45  
46  
47  
48  
49  
50  
51  
52  
53  
54  
55  
56  
57  
58  
59  
60

|                                                                                   |                  |                                                                                    |               |
|-----------------------------------------------------------------------------------|------------------|------------------------------------------------------------------------------------|---------------|
|  | Severe ID No ASD |  | ASD ID        |
|  | Biomedical ID    |  | ASD No ID     |
|  | Mild ID No ASD   |  | No ASD No ID  |
|  | Born at Term     |  | Born Pre-Term |

164x35mm (300 x 300 DPI)

Or peer review only

STROBE 2007 (v4) Statement—Checklist of items that should be included in reports of cohort studies

| Section/Topic             | Item # | Recommendation                                                                                                                                                                       | Reported on page # |
|---------------------------|--------|--------------------------------------------------------------------------------------------------------------------------------------------------------------------------------------|--------------------|
| Title and abstract        | 1      | (a) Indicate the study’s design with a commonly used term in the title or the abstract                                                                                               | 1                  |
|                           |        | (b) Provide in the abstract an informative and balanced summary of what was done and what was found                                                                                  | 2                  |
| <b>Introduction</b>       |        |                                                                                                                                                                                      | <b>3</b>           |
| Background/rationale      | 2      | Explain the scientific background and rationale for the investigation being reported                                                                                                 | 4 – 5              |
| Objectives                | 3      | State specific objectives, including any prespecified hypotheses                                                                                                                     | 5                  |
| <b>Methods</b>            |        |                                                                                                                                                                                      |                    |
| Study design              | 4      | Present key elements of study design early in the paper                                                                                                                              | 7                  |
| Setting                   | 5      | Describe the setting, locations, and relevant dates, including periods of recruitment, exposure, follow-up, and data collection                                                      | 5-7                |
| Participants              | 6      | (a) Give the eligibility criteria, and the sources and methods of selection of participants. Describe methods of follow-up                                                           | 5-7                |
|                           |        | (b) For matched studies, give matching criteria and number of exposed and unexposed                                                                                                  | not applicable     |
| Variables                 | 7      | Clearly define all outcomes, exposures, predictors, potential confounders, and effect modifiers. Give diagnostic criteria, if applicable                                             | 6-7                |
| Data sources/ measurement | 8*     | For each variable of interest, give sources of data and details of methods of assessment (measurement). Describe comparability of assessment methods if there is more than one group | 6-7                |
| Bias                      | 9      | Describe any efforts to address potential sources of bias                                                                                                                            | 4-7                |
| Study size                | 10     | Explain how the study size was arrived at                                                                                                                                            | 5-7                |
| Quantitative variables    | 11     | Explain how quantitative variables were handled in the analyses. If applicable, describe which groupings were chosen and why                                                         | 7                  |
| Statistical methods       | 12     | (a) Describe all statistical methods, including those used to control for confounding                                                                                                | 7                  |
|                           |        | (b) Describe any methods used to examine subgroups and interactions                                                                                                                  | not applicable     |
|                           |        | (c) Explain how missing data were addressed                                                                                                                                          | not applicable     |
|                           |        | (d) If applicable, explain how loss to follow-up was addressed                                                                                                                       | not applicable     |
|                           |        | (e) Describe any sensitivity analyses                                                                                                                                                | not applicable     |
| <b>Results</b>            |        |                                                                                                                                                                                      |                    |

|                          |     |                                                                                                                                                                                                              |                |
|--------------------------|-----|--------------------------------------------------------------------------------------------------------------------------------------------------------------------------------------------------------------|----------------|
| Participants             | 13* | (a) Report numbers of individuals at each stage of study—eg numbers potentially eligible, examined for eligibility, confirmed eligible, included in the study, completing follow-up, and analysed            | 7-8            |
|                          |     | (b) Give reasons for non-participation at each stage                                                                                                                                                         | not applicable |
|                          |     | (c) Consider use of a flow diagram                                                                                                                                                                           | not available  |
| Descriptive data         | 14* | (a) Give characteristics of study participants (eg demographic, clinical, social) and information on exposures and potential confounders                                                                     | table 1        |
|                          |     | (b) Indicate number of participants with missing data for each variable of interest                                                                                                                          | not applicable |
|                          |     | (c) Summarise follow-up time (eg, average and total amount)                                                                                                                                                  | 7-8            |
| Outcome data             | 15* | Report numbers of outcome events or summary measures over time                                                                                                                                               | 8-9            |
| Main results             | 16  | (a) Give unadjusted estimates and, if applicable, confounder-adjusted estimates and their precision (eg, 95% confidence interval). Make clear which confounders were adjusted for and why they were included | 9-10           |
|                          |     | (b) Report category boundaries when continuous variables were categorized                                                                                                                                    | 7              |
|                          |     | (c) If relevant, consider translating estimates of relative risk into absolute risk for a meaningful time period                                                                                             | 8              |
| Other analyses           | 17  | Report other analyses done—eg analyses of subgroups and interactions, and sensitivity analyses                                                                                                               | 8              |
| <b>Discussion</b>        |     |                                                                                                                                                                                                              |                |
| Key results              | 18  | Summarise key results with reference to study objectives                                                                                                                                                     | 10             |
| <b>Limitations</b>       |     |                                                                                                                                                                                                              |                |
| Interpretation           | 20  | Give a cautious overall interpretation of results considering objectives, limitations, multiplicity of analyses, results from similar studies, and other relevant evidence                                   | 12             |
| Generalisability         | 21  | Discuss the generalisability (external validity) of the study results                                                                                                                                        | 12             |
| <b>Other information</b> |     |                                                                                                                                                                                                              |                |
| Funding                  | 22  | Give the source of funding and the role of the funders for the present study and, if applicable, for the original study on which the present article is based                                                | 13             |

\*Give information separately for cases and controls in case-control studies and, if applicable, for exposed and unexposed groups in cohort and cross-sectional studies.

**Note:** An Explanation and Elaboration article discusses each checklist item and gives methodological background and published examples of transparent reporting. The STROBE checklist is best used in conjunction with this article (freely available on the Web sites of PLoS Medicine at <http://www.plosmedicine.org/>, Annals of Internal Medicine at <http://www.annals.org/>, and Epidemiology at <http://www.epidem.com/>). Information on the STROBE Initiative is available at [www.strobe-statement.org](http://www.strobe-statement.org).
